# Supplementary material for: Insights into the Genetic Architecture and Genomic Prediction of Powdery Mildew Resistance in Flax (Linum usitatissimum L.)
Source: MDPI journal article supplement (doi:10.3390/ijms23094960), 2022-04-29
Supplement: s1 [file s1]

**Table S5.** The number of common quantitative trait nucleotides (QTNs) with powdery mildew (PM) ratings identified by any two statistical models.

| <b>Methods</b> | <b>GLM</b> | <b>FASTmr<br/>MLM</b> | <b>FASTmr<br/>EMMA</b> | <b>ISIS EM-<br/>BLASSO</b> | <b>mrMLM</b> | <b>pKWmEB</b> | <b>pLARmEB</b> |
|----------------|------------|-----------------------|------------------------|----------------------------|--------------|---------------|----------------|
| FASTmrMLM      | 2          |                       |                        |                            |              |               |                |
| FASTmrEMMA     | 2          | 19                    |                        |                            |              |               |                |
| ISIS EM-BLASSO | 4          | 20                    | 13                     |                            |              |               |                |
| mrMLM          | 2          | 22                    | 16                     | 17                         |              |               |                |
| pKWmEB         | 4          | 19                    | 15                     | 29                         | 18           |               |                |
| pLARmEB        | 2          | 39                    | 19                     | 14                         | 20           |               |                |
| FarmCPU        | 3          | 3                     | 0                      | 3                          | 2            | 20            | 1              |
