# Supplementary material for: Insights into the Genetic Architecture and Genomic Prediction of Powdery Mildew Resistance in Flax (Linum usitatissimum L.)
Source: MDPI journal article supplement (doi:10.3390/ijms23094960), 2022-04-29
Supplement: s1 [file s1]

**Table S7.** Common quantitative trait nucleotides (QTNs) which were identified from two powdery mildew (PM) datasets.

| <b>Phenotype<br/>Dataset</b> | <b>PM-2012</b> | <b>PM-2013</b> | <b>PM-2014</b> | <b>PM-2015</b> | <b>PM-2016</b> |
|------------------------------|----------------|----------------|----------------|----------------|----------------|
| PM-2013                      | 0              |                |                |                |                |
| PM-2014                      | 0              | 1              |                |                |                |
| PM-2015                      | 0              | 0              | 1              |                |                |
| PM-2016                      | 0              | 0              | 1              | 1              |                |
| PM-Mean                      | 3              | 2              | 9              | 8              | 1              |
