# Supplementary material for: Insights into the Genetic Architecture and Genomic Prediction of Powdery Mildew Resistance in Flax (Linum usitatissimum L.)
Source: MDPI journal article supplement (doi:10.3390/ijms23094960), 2022-04-29
Supplement: s1 [file s1]

**Table S4.** Quantitative trait nucleotides (QTNs) associated with powdery mildew (PM) ratings identified using two single locus and seven multi-locus models from seven phenotype data sets. No QTNs were detected by MLM.

| <b>Statistical Model</b> | <b>No. of QTL/QTNs<br/>Identified</b> | <b>Average <math>R^2</math> (%)</b> | <b>Range of <math>R^2</math> (%)</b> |
|--------------------------|---------------------------------------|-------------------------------------|--------------------------------------|
| GLM                      | 9                                     | 11.34                               | 0.65 – 27.62                         |
| FASTmrEMMA               | 68                                    | 4.24                                | 0.02 – 21.28                         |
| FASTmrMLM                | 105                                   | 5.25                                | 0.02 – 29.67                         |
| ISIS EM-BLASSO           | 83                                    | 3.66                                | 0.02 – 17.28                         |
| mrMLM                    | 72                                    | 4.74                                | 0.02 – 26.93                         |
| pKWmeB                   | 90                                    | 3.19                                | 0.01 – 26.93                         |
| pLARmeB                  | 108                                   | 5.79                                | 0.02 – 30.20                         |
| FarmCPU                  | 15                                    | 9.07                                | 0.04 – 27.62                         |
| <b>Total unique</b>      | <b>349</b>                            | <b>4.53</b>                         | <b>0.01 – 30.20</b>                  |
