# Supplementary material for: Insights into the Genetic Architecture and Genomic Prediction of Powdery Mildew Resistance in Flax (Linum usitatissimum L.)
Source: MDPI journal article supplement (doi:10.3390/ijms23094960), 2022-04-29
Supplement: s1 [file s1]

**Table S6.** Quantitative trait nucleotides (QTNs) identified from various phenotypic datasets.

| <b>Phenotype Dataset</b> | <b>No. of QTNs Identified</b> | <b>Average <math>R^2</math> (%)</b> | <b>Range of <math>R^2</math> (%)</b> |
|--------------------------|-------------------------------|-------------------------------------|--------------------------------------|
| PM-2012                  | 45                            | 4.61                                | 0.03 – 20.89                         |
| PM-2013                  | 73                            | 6.57                                | 0.02 – 30.20                         |
| PM-2014                  | 84                            | 4.17                                | 0.02 – 21.28                         |
| PM-2015                  | 64                            | 4.34                                | 0.02 – 29.67                         |
| PM-2016                  | 43                            | 2.92                                | 0.01 - 15.67                         |
| PM-Mean                  | 63                            | 4.76                                | 0.01 – 26.93                         |
