# Supplementary material for: Insights into the Genetic Architecture and Genomic Prediction of Powdery Mildew Resistance in Flax (Linum usitatissimum L.)
Source: MDPI journal article supplement (doi:10.3390/ijms23094960), 2022-04-29
Supplement: s1 [file s1]

**Table S1.** Powdery mildew (PM) ratings of the 75 selected breeding lines across 8 years (2010-2017).

| <b>Year</b> | <b><math>\bar{x} \pm s</math></b> | <b>CV (%)</b> |
|-------------|-----------------------------------|---------------|
| 2010        | 1.70 $\pm$ 0.75                   | 44.12         |
| 2011        | 3.24 $\pm$ 1.12                   | 34.57         |
| 2012        | 2.59 $\pm$ 0.90                   | 34.75         |
| 2013        | 2.41 $\pm$ 0.98                   | 40.66         |
| 2014        | 2.27 $\pm$ 0.95                   | 41.85         |
| 2015        | 2.39 $\pm$ 0.78                   | 32.64         |
| 2016        | 2.24 $\pm$ 0.91                   | 40.63         |
| 2017        | 2.01 $\pm$ 0.77                   | 38.31         |
| Mean        | 2.34 $\pm$ 1.00                   | 42.74         |
