# Supplementary material for: Insights into the Genetic Architecture and Genomic Prediction of Powdery Mildew Resistance in Flax (Linum usitatissimum L.)
Source: MDPI journal article supplement (doi:10.3390/ijms23094960), 2022-04-29
Supplement: s1 [file s1]

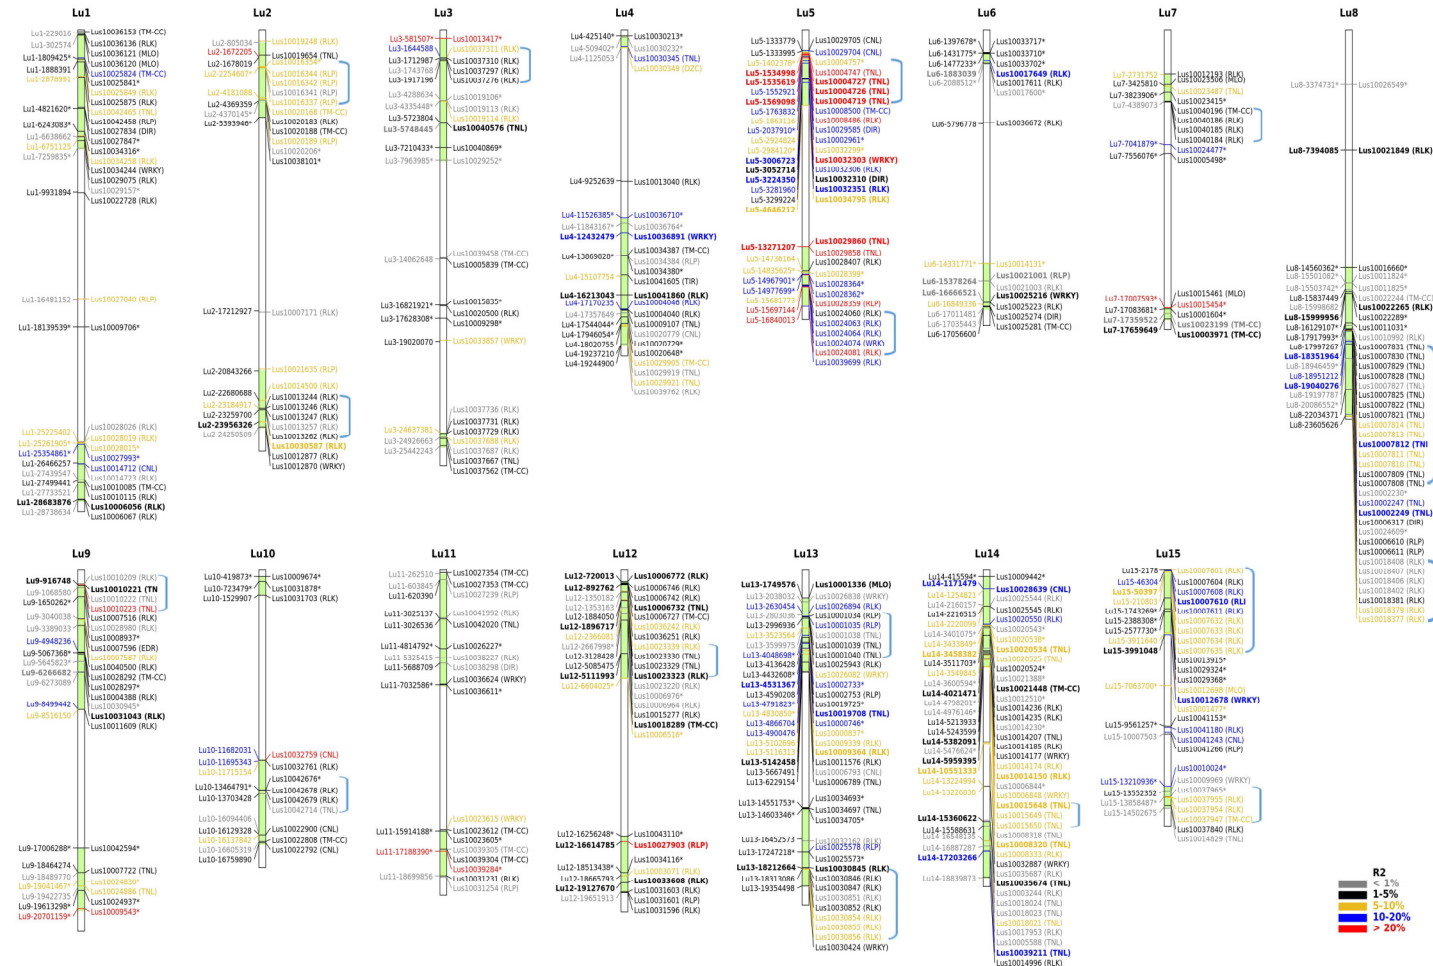

**Figure S2.** Chromosome distribution of 445 candidate resistance gene analogs (RGA) and 87 non-RGAs (labeled with ‘\*’) co-located with 269 quantitative trait nucleotides (QTNs) within 200 Kb genome regions of the QTNs.  $R^2$  represents the proportion of phenotypic variation explained by a QTN or a SNP on a candidate gene. The brackets show candidate gene clusters that contain at least three genes.
