# Supplementary material for: Insights into the Genetic Architecture and Genomic Prediction of Powdery Mildew Resistance in Flax (Linum usitatissimum L.)
Source: MDPI journal article supplement (doi:10.3390/ijms23094960), 2022-04-29
Supplement: s1 [file s1]

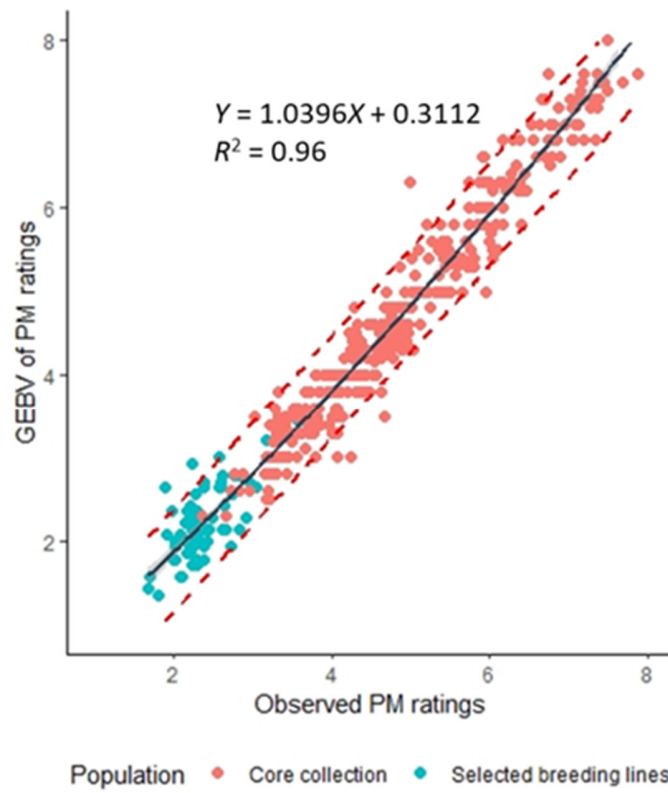

**Figure S5.** Relationship between the mean powdery mildew (PM) ratings over five years and the genomic estimated breeding value (GEBV) predicted by a GBLUP model constructed using 349 quantitative trait nucleotides (QTNs) and 447 accessions.
