# Supplementary material for: Insights into the Genetic Architecture and Genomic Prediction of Powdery Mildew Resistance in Flax (Linum usitatissimum L.)
Source: MDPI journal article supplement (doi:10.3390/ijms23094960), 2022-04-29
Supplement: s1 [file s1]

**Table S2.** Haplotype blocks identified from 247,160 single nucleotide polymorphisms (SNPs) in the core collection and selected breeding lines.

| Chr <sup>1</sup> | No of SNPs      | No of Blocks<br>(≥ 2 SNPs) | No of Singletons | Average SNPs per Block | Average Block Size (Kb) | Min – Max Size (Kb)    |
|------------------|-----------------|----------------------------|------------------|------------------------|-------------------------|------------------------|
|                  |                 |                            |                  |                        | -Exclude Singletons     |                        |
| Lu1              | 23, 584         | 4, 503                     | 8, 691           | 3.31                   | 2.00 ± 4.58             | 0.003 ± 112.851        |
| Lu2              | 17, 884         | 3, 389                     | 6, 408           | 3.39                   | 1.91 ± 5.85             | 0.003 ± 172.352        |
| Lu3              | 19, 564         | 3, 719                     | 7, 568           | 2.23                   | 2.09 ± 5.40             | 0.003 ± 119.824        |
| Lu4              | 12, 387         | 2, 383                     | 5, 134           | 3.04                   | 2.09 ± 4.59             | 0.003 ± 59.76          |
| Lu5              | 9, 251          | 1, 778                     | 5, 205           | 2.28                   | 1.73 ± 3.71             | 0.003 ± 60.963         |
| Lu6              | 17, 377         | 3, 282                     | 6, 471           | 3.32                   | 1.81 ± 3.83             | 0.003 ± 68.92          |
| Lu7              | 16, 570         | 3, 242                     | 6, 131           | 3.22                   | 1.69 ± 3.87             | 0.003 ± 90.713         |
| Lu8              | 14, 151         | 2, 774                     | 5, 719           | 3.04                   | 2.46 ± 4.46             | 0.003 ± 157.511        |
| Lu9              | 17, 417         | 3, 349                     | 6, 149           | 3.36                   | 1.91 ± 4.81             | 0.003 ± 105.901        |
| Lu10             | 13, 145         | 2, 463                     | 5, 154           | 3.24                   | 2.28 ± 4.59             | 0.003 ± 73.838         |
| Lu11             | 14, 284         | 2, 748                     | 5, 433           | 3.22                   | 1.90 ± 4.33             | 0.003 ± 114.884        |
| Lu12             | 19, 046         | 3, 743                     | 6, 669           | 3.31                   | 1.79 ± 4.00             | 0.003 ± 64.149         |
| Lu13             | 21, 242         | 4, 064                     | 8, 038           | 3.25                   | 1.81 ± 4.48             | 0.003 ± 106.751        |
| Lu14             | 17, 254         | 3, 341                     | 6, 316           | 3.27                   | 1.73 ± 4.08             | 0.003 ± 77.431         |
| Lu15             | 14, 004         | 2, 786                     | 5, 088           | 3.20                   | 1.77 ± 5.12             | 0.003 ± 99.929         |
| <b>Total</b>     | <b>247, 160</b> | <b>47, 564</b>             | <b>94, 174</b>   | <b>3.22</b>            | <b>1.93 ± 4.72</b>      | <b>0.003 ± 172.352</b> |

<sup>1</sup> Chr: chromosome
