# Supplementary material for: Insights into the Genetic Architecture and Genomic Prediction of Powdery Mildew Resistance in Flax (Linum usitatissimum L.)
Source: Int J Mol Sci. 2022 Apr 29;23(9):4960. doi: 10.3390/ijms23094960 (PMC9104541; doi:10.3390/ijms23094960)
Supplement: Supplementary file 1 [file ijms-23-04960-s001.zip]

Archive with 15 entries (15 files):
- FigureS1.pdf
- FigureS2.pdf
- FigureS3.pdf
- FigureS4.pdf
- FigureS5.pdf
- FigureS6.pdf
- TableS1.pdf
- TableS2.pdf
- TableS3.xls
- TableS4.pdf
- TableS5.pdf
- TableS6.pdf
- TableS7.pdf
- TableS8.xlsx
- TableS9.xlsx
