# Supplementary material for: Insights into the Genetic Architecture and Genomic Prediction of Powdery Mildew Resistance in Flax (Linum usitatissimum L.)
Source: Int J Mol Sci. 2022 Apr 29;23(9):4960. doi: 10.3390/ijms23094960 (PMC9104541; doi:10.3390/ijms23094960)
Supplement: Supplementary file 1 [file ijms-23-04960-s001.zip › TableS3.xls]

## Sheet: 349_QTN_candidate_genes
Table S3. 349 quantitative trait nucleotides (QTNs) and potential candidate genes associated with powdery mildew ratings identified from all SNPs
SNP set	QTL	tagQTN	Chr	Pos	Ref_allele	Alt_allele	FA	MAF	FAF	No_sig_ENVs	Effect CV (%)	Effect for PM-Mean dataset	R2 for PM-Mean dataset	Statistical_models	No_stat_models	Datasets	No_datasets	No candidate genesgenes	Candidate gene info	Genes with QTNs	RGA Genes with QTNs
All SNPs	1	Lu1-229016	1	229016	T	C	C	0.21	0.79	3	120.31	0.25	0.67	FarmCPU	1	PM_2013	1	3	Lus10036136/241089/242719/RLK;Lus10036139/229755/230220/RLK;Lus10036153/137341/149486/TM-CC
All SNPs	2	Lu1-302574	1	302574	T	C	T	0.35	0.35	1	169.59	-0.07	0.11	FASTmrEMMA	1	PM_Mean	1	4	Lus10036120/362286/366213/MLO;Lus10036121/357121/360754/MLO;Lus10036136/241089/242719/RLK;Lus10036139/229755/230220/RLK
All SNPs	3	Lu1-1809425	1	1809425	A	G	G	0.12	0.88	6	31.69	0.95	4.75	ISIS EM-BLASSO	1	PM_Mean	1	2	Lus10025824/1728943/1735992/TM-CC;Lus10025849/1841922/1845721/RLK	Lus10025841/1807358/1810368/vernalization5
All SNPs	4	Lu1-1888391	1	1888391	C	G	G	0.17	0.83	4	76.35	0.49	2.07	FarmCPU	1	PM_2013	1	2	Lus10025849/1841922/1845721/RLK;Lus10025875/1966159/1966953/RLK
All SNPs	5	Lu1-2878991	1	2878991	C	T	T	0.37	0.63	5	49.81	0.56	7.47	FASTmrMLM	1	PM_2012	1	2	Lus10042458/2871770/2873117/RLP;Lus10042465/2838377/2839771/TNL
All SNPs	6	Lu1-3076062	1	3076062	C	T	T	0.23	0.77	4	81.47	0.5	2.92	FASTmrEMMA,pLARmEB	2	PM_2012	1	1	Lus10042397/3132145/3134488/MLO
All SNPs	7	Lu1-3315790	1	3315790	G	A	A	0.24	0.76	4	49.23	0.62	4.91	FASTmrMLM	1	PM_Mean	1	1
All SNPs	8	Lu1-3956807	1	3956807	A	C	C	0.37	0.63	6	38.25	0.49	5.66	pKWmEB	1	PM_2014	1	1
All SNPs	9	Lu1-4614918	1	4614918	C	T	C	0.19	0.19	5	29.73	-0.58	3.2	mrMLM,pLARmEB	2	PM_2014	1	1
All SNPs	10	Lu1-4821620	1	4821620	A	C	A	0.29	0.29	5	34.64	-0.37	2.21	FASTmrEMMA,mrMLM,pKWmEB,pLARmEB	4	PM_2012	1	1	Lus10027834/4756223/4756906/DIR	Lus10027847/4820822/4821975/Basic-leucine zipper (bZIP) transcription factor family protein
All SNPs	11	Lu1-6243083	1	6243083	G	A	G	0.32	0.32	2	76.05	-0.24	1.03	FASTmrEMMA	1	PM_2015	1	1		Lus10034316/6242564/6243517/Integrase-type DNA-binding superfamily protein
All SNPs	12	Lu1-6638662	1	6638662	C	A	A	0.1	0.9	1	90.62	0.3	0.41	ISIS EM-BLASSO,pKWmEB	2	PM_2013	1	7	Lus10034217/6709334/6709681/RLK;Lus10034242/6599897/6600799/RLK;Lus10034244/6595129/6596522/WRKY;Lus10034245/6590687/6594268/WRKY;Lus10034246/6586729/6587413/RLK;Lus10034257/6548559/6550209/RLK;Lus10034258/6547628/6548218/RLK
All SNPs	13	Lu1-6751125	1	6751125	C	G	G	0.34	0.66	6	37.83	0.52	5.72	FASTmrMLM,pLARmEB	2	PM_2014	1	2	Lus10029075/6838254/6842414/RLK;Lus10034217/6709334/6709681/RLK
All SNPs	14	Lu1-7259835	1	7259835	C	T	T	0.42	0.58	1	391.38	0.03	0.03	pKWmEB	1	PM_2012	1	1		Lus10029157/7259773/7260338/Unknown
All SNPs	15	Lu1-7811292	1	7811292	C	T	T	0.22	0.78	4	57.41	0.63	4.57	pLARmEB	1	PM_2014	1	1
All SNPs	16	Lu1-9931894	1	9931894	A	G	A	0.24	0.24	5	46.64	-0.45	2.59	mrMLM,pLARmEB	2	PM_2014	1	3	Lus10022728/9947629/9950374/RLK;Lus10022736/9920158/9921484/WRKY;Lus10022738/9904469/9907409/RLK
All SNPs	17	Lu1-16481152	1	16481152	T	C	C	0.19	0.81	1	80.05	0.18	0.32	pKWmEB	1	PM_2015	1	1	Lus10027040/16459072/16459731/RLP
All SNPs	18	Lu1-18139539	1	18139539	T	C	T	0.48	0.52	4	61.51	-0.2	1.81	ISIS EM-BLASSO,pKWmEB	2	PM_2015	1	1	Lus10009703/18125241/18127926/RLK	Lus10009706/18138555/18140489/Tetratricopeptide repeat (TPR)-like superfamily protein
All SNPs	19	Lu1-18452203	1	18452203	A	T	T	0.41	0.59	6	29.84	0.39	4.18	pLARmEB	1	PM_Mean	1	1
All SNPs	20	Lu1-20253410	1	20253410	T	C	T	0.46	0.46	1	272.3	-0.03	0.04	FASTmrMLM,pLARmEB	2	PM_2016	1	2	Lus10020935/20188774/20191973/RLK;Lus10020936/20199563/20202012/RLK
All SNPs	21	Lu1-23922728	1	23922728	C	G	C	0.22	0.22	3	51.89	-0.38	1.6	mrMLM	1	PM_Mean	1	1
All SNPs	22	Lu1-25225402	1	25225402	A	G	A	0.46	0.46	6	28.79	-0.43	6.25	pLARmEB	1	PM_2014	1	2	Lus10028019/25231874/25232281/RLK;Lus10028026/25197319/25197735/RLK
All SNPs	23	Lu1-25261905	1	25261905	A	G	G	0.1	0.9	6	42.82	1.24	6.63	pKWmEB	1	PM_2013	1	2	Lus10028019/25231874/25232281/RLK;Lus10028026/25197319/25197735/RLK	Lus10028015/25260993/25262015/isopentenyltransferase 3
All SNPs	24	Lu1-25354861	1	25354861	C	G	G	0.14	0.86	6	39.25	1.31	11.14	FASTmrMLM,ISIS EM-BLASSO,mrMLM,pKWmEB	4	PM_2014	1	1		Lus10027993/25354591/25355612/C-8,7 sterol isomerase
All SNPs	25	Lu1-26466257	1	26466257	A	G	A	0.08	0.08	4	27.16	-0.7	1.79	ISIS EM-BLASSO	1	PM_Mean	1	2	Lus10014712/26487140/26490037/CNL;Lus10014723/26538142/26539029/RLK
All SNPs	26	Lu1-27439547	1	27439547	T	C	C	0.2	0.8	1	91.15	0.12	0.14	ISIS EM-BLASSO,pKWmEB	2	PM_2012	1	2	Lus10010085/27513205/27516324/TM-CC;Lus10010087/27524258/27527626/RLK
All SNPs	27	Lu1-27499441	1	27499441	C	T	C	0.25	0.25	6	61.11	-0.6	4.69	mrMLM	1	PM_2014	1	2	Lus10010085/27513205/27516324/TM-CC;Lus10010087/27524258/27527626/RLK
All SNPs	28	Lu1-27733521	1	27733521	C	T	T	0.27	0.73	1	142.44	0.17	0.44	pKWmEB	1	PM_2014	1	2	Lus10010115/27654934/27655257/RLK;Lus10018815/27823004/27824842/WRKY
All SNPs	29	Lu1-28738634	1	28738634	A	G	G	0.27	0.73	1	48.75	0.19	0.55	pKWmEB	1	PM_2013	1	3	Lus10006056/28681727/28684082/RLK;Lus10006057/28686182/28689003/RLK;Lus10006067/28745009/28748864/RLK
All SNPs	30	Lu2-805034	2	805034	A	G	G	0.1	0.9	3	130.44	0.43	0.86	FASTmrEMMA	1	PM_2013	1	1	Lus10019248/722575/726044/RLK
All SNPs	31	Lu2-1672205	2	1672205	T	C	T	0.32	0.32	6	30.67	-1.28	30.2	pLARmEB	1	PM_2013	1	1	Lus10019654/1583715/1588562/TNL
All SNPs	32	Lu2-1678019	2	1678019	T	G	T	0.22	0.22	5	28.72	-0.41	1.88	FASTmrMLM,pLARmEB	2	PM_2012,PM_Mean	2	1	Lus10019654/1583715/1588562/TNL
All SNPs	33	Lu2-2254607	2	2254607	G	A	G	0.5	0.5	6	53.54	-0.5	9.78	mrMLM	1	PM_2016	1	7	Lus10016337/2328690/2332210/RLP;Lus10016338/2324392/2326916/RLP;Lus10016339/2320228/2323230/RLP;Lus10016340/2316548/2319583/RLP;Lus10016341/2311709/2314696/RLP;Lus10016342/2307887/2310784/RLP;Lus10016344/2296482/2299289/RLP	Lus10016354/2253299/2256416/NAD(P)-binding Rossmann-fold superfamily protein
All SNPs	34	Lu2-2692095	2	2692095	C	T	C	0.5	0.5	5	70.87	-0.28	3.11	ISIS EM-BLASSO	1	PM_2016	1	1
All SNPs	35	Lu2-3371783	2	3371783	C	G	C	0.32	0.32	6	24.77	-0.78	11.56	FASTmrMLM	1	PM_Mean	1	1
All SNPs	36	Lu2-4181088	2	4181088	T	C	T	0.49	0.51	6	37.61	-0.44	8.17	pLARmEB	1	PM_Mean	1	2	Lus10020168/4164564/4170673/TM-CC;Lus10020183/4257022/4259288/RLK
All SNPs	37	Lu2-4369359	2	4369359	T	G	G	0.14	0.86	6	30.36	0.62	2.52	FASTmrMLM,pLARmEB	2	PM_2014	1	3	Lus10020188/4283474/4286653/TM-CC;Lus10020189/4289398/4291506/RLP;Lus10020215/4421980/4423988/WRKY
All SNPs	38	Lu2-4370145	2	4370145	A	T	T	0.09	0.91	3	75.67	0.5	0.94	mrMLM,pKWmEB,pLARmEB	3	PM_2014,PM_Mean	2	3	Lus10020188/4283474/4286653/TM-CC;Lus10020189/4289398/4291506/RLP;Lus10020215/4421980/4423988/WRKY	Lus10020206/4369777/4372400/serine carboxypeptidase-like 20
All SNPs	39	Lu2-4804138	2	4804138	T	C	C	0.23	0.77	4	122.4	0.26	0.79	FASTmrMLM	1	PM_2014	1	1
All SNPs	40	Lu2-5393946	2	5393946	A	G	G	0.41	0.59	6	34.09	0.35	3.48	FASTmrMLM,ISIS EM-BLASSO,pLARmEB	3	PM_2015	1	1	Lus10038107/5348911/5352631/RLP	Lus10038101/5393614/5394009/serine-rich protein-related
All SNPs	41	Lu2-7280299	2	7280299	A	G	G	0.1	0.9	6	40.75	1.36	8.3	FASTmrMLM	1	PM_2013	1	1
All SNPs	42	Lu2-10480142	2	10480142	A	T	T	0.09	0.91	5	49.81	0.72	2.01	pKWmEB	1	PM_2014	1	1
All SNPs	43	Lu2-16085403	2	16085403	T	G	G	0.09	0.91	1	253.96	0.1	0.04	FarmCPU	1	PM_Mean	1	1
All SNPs	44	Lu2-17100079	2	17100079	A	G	G	0.43	0.57	1	478.41	0.05	0.08	mrMLM	1	PM_2016	1	1
All SNPs	45	Lu2-17212927	2	17212927	G	T	T	0.41	0.59	5	41.54	0.33	3.06	FASTmrMLM	1	PM_2016	1	1	Lus10007171/17269174/17270105/RLK
All SNPs	46	Lu2-19593377	2	19593377	G	A	G	0.17	0.17	6	36.25	-1.02	8.75	pKWmEB,pLARmEB	2	PM_2015	1	1
All SNPs	47	Lu2-20843266	2	20843266	A	G	G	0.09	0.91	4	81.75	0.55	1.28	FASTmrMLM,pLARmEB	2	PM_2016	1	1	Lus10021635/20754888/20758057/RLP
All SNPs	48	Lu2-21814534	2	21814534	G	A	G	0.5	0.5	6	33.56	-0.3	3.63	FASTmrEMMA	1	PM_2014	1	1
All SNPs	49	Lu2-22680688	2	22680688	C	T	C	0.49	0.51	3	69.14	-0.19	1.45	FASTmrEMMA	1	PM_2015	1	1	Lus10014500/22683146/22686348/RLK
All SNPs	50	Lu2-22797844	2	22797844	T	C	T	0.32	0.32	6	53.11	-0.54	5.62	FASTmrMLM,mrMLM,pKWmEB	3	PM_2015	1	1
All SNPs	51	Lu2-23184917	2	23184917	T	C	C	0.21	0.79	6	42.03	0.76	6.31	FASTmrMLM,ISIS EM-BLASSO	2	PM_2014	1	5	Lus10013244/23157915/23160932/RLK;Lus10013246/23172063/23175081/RLK;Lus10013247/23175653/23177507/RLK;Lus10013257/23233618/23234049/RLK;Lus10013262/23254936/23257353/RLK
All SNPs	52	Lu2-23259700	2	23259700	G	C	C	0.29	0.71	5	53.17	0.46	3.47	ISIS EM-BLASSO	1	PM_2014	1	5	Lus10013244/23157915/23160932/RLK;Lus10013246/23172063/23175081/RLK;Lus10013247/23175653/23177507/RLK;Lus10013257/23233618/23234049/RLK;Lus10013262/23254936/23257353/RLK
All SNPs	53	Lu2-23956609	2	23956609	A	C	A	0.22	0.22	3	38.27	-0.35	1.39	FASTmrEMMA,pKWmEB	2	PM_Mean	1	2	Lus10030587/23955411/23958647/RLK;Lus10030589/23945145/23948006/RLK	Lus10030587/23955411/23958647/Leucine-rich repeat protein kinase family protein	Lus10030587/23955411/23958647/RLK
All SNPs	54	Lu2-24250509	2	24250509	C	T	T	0.28	0.72	1	96.33	0.12	0.22	pKWmEB	1	PM_2013	1	2	Lus10012870/24294640/24295903/WRKY;Lus10012877/24261497/24264627/RLK
All SNPs	55	Lu2-24547727	2	24547727	A	G	A	0.27	0.27	4	32.59	-0.35	1.87	FASTmrMLM,ISIS EM-BLASSO,pKWmEB	3	PM_2016	1	1
All SNPs	56	Lu2-25211413	2	25211413	C	A	A	0.43	0.57	6	44.69	0.48	7.17	FASTmrMLM	1	PM_2012	1	1	Lus10006445/25259433/25261671/RLK
All SNPs	57	Lu3-579712	3	579712	C	T	C	0.16	0.16	1	49.2	-0.19	0.29	ISIS EM-BLASSO,pKWmEB	2	PM_2016	1	1
All SNPs	58	Lu3-581507	3	581507	A	T	A	0.28	0.28	6	29.99	-1.34	27.62	FarmCPU,GLM	2	PM_2013	1	1		Lus10013417/580445/584432/sucrose synthase 3
All SNPs	59	Lu3-1644588	3	1644588	A	G	A	0.3	0.3	6	35.41	-0.84	11.92	FarmCPU	1	PM_2013	1	3	Lus10037310/1744034/1747357/RLK;Lus10037311/1738506/1742264/RLK;Lus10037339/1613460/1614125/RLK
All SNPs	60	Lu3-1712987	3	1712987	A	G	G	0.15	0.85	5	42.14	0.79	4.48	pLARmEB	1	PM_2015	1	3	Lus10037310/1744034/1747357/RLK;Lus10037311/1738506/1742264/RLK;Lus10037339/1613460/1614125/RLK
All SNPs	61	Lu3-1743768	3	1743768	G	A	A	0.29	0.71	4	153.6	0.2	0.67	ISIS EM-BLASSO,mrMLM,pKWmEB,pLARmEB	4	PM_2015	1	3	Lus10037297/1815017/1816267/RLK;Lus10037310/1744034/1747357/RLK;Lus10037311/1738506/1742264/RLK
All SNPs	62	Lu3-1917196	3	1917196	T	C	C	0.33	0.67	5	58.95	0.41	3.33	FASTmrEMMA,FASTmrMLM	2	PM_2012	1	1	Lus10037276/1897891/1900982/RLK
All SNPs	63	Lu3-4288634	3	4288634	T	G	T	0.47	0.53	1	180.28	-0.03	0.05	FASTmrMLM	1	PM_2015	1	2	Lus10019113/4369569/4371800/RLK;Lus10019114/4381523/4388318/RLK
All SNPs	64	Lu3-4335448	3	4335448	C	T	T	0.36	0.64	2	304.62	0.03	0.02	mrMLM	1	PM_2015	1	3	Lus10019113/4369569/4371800/RLK;Lus10019114/4381523/4388318/RLK;Lus10019120/4429497/4430153/TM-CC	Lus10019106/4335290/4335920/hydroxycinnamoyl-CoA shikimate
All SNPs	65	Lu3-5723804	3	5723804	A	G	A	0.36	0.36	4	101.29	-0.26	1.52	pLARmEB	1	PM_2014	1	1	Lus10040576/5746000/5750240/TNL
All SNPs	66	Lu3-6007426	3	6007426	A	T	T	0.31	0.69	2	157.32	0.14	0.34	FASTmrMLM,pLARmEB	2	PM_2015	1	1	Lus10040620/5998536/6001221/TM-CC
All SNPs	67	Lu3-7210433	3	7210433	G	A	A	0.08	0.92	4	43.93	0.86	2.59	pKWmEB	1	PM_2012	1	1		Lus10040869/7209207/7210604/Tetratricopeptide repeat (TPR)-like superfamily protein
All SNPs	68	Lu3-7242436	3	7242436	T	C	C	0.1	0.9	6	26.2	0.68	2.08	ISIS EM-BLASSO	1	PM_2014	1	1
All SNPs	69	Lu3-7621277	3	7621277	T	G	G	0.44	0.56	5	52.38	0.28	2.45	FASTmrMLM,pLARmEB	2	PM_2014	1	1
All SNPs	70	Lu3-7963985	3	7963985	A	T	T	0.13	0.87	1	311.43	0.04	0.01	pKWmEB	1	PM_Mean	1	2	Lus10029241/8054726/8057356/RLK;Lus10029252/7962622/7964220/WRKY	Lus10029252/7962622/7964220/WRKY DNA-binding protein 65
All SNPs	71	Lu3-8458910	3	8458910	C	A	A	0.36	0.64	2	134.03	0.12	0.31	mrMLM	1	PM_2015	1	1
All SNPs	72	Lu3-8499965	3	8499965	G	A	A	0.37	0.63	2	239.52	0.06	0.1	FASTmrMLM	1	PM_2015	1	1
All SNPs	73	Lu3-14062648	3	14062648	A	G	A	0.33	0.33	2	363.82	-0.06	0.07	FASTmrEMMA,ISIS EM-BLASSO	2	PM_2015	1	3	Lus10005833/14134018/14135147/TM-CC;Lus10005839/14027882/14033536/TM-CC;Lus10039458/13970596/13976209/TM-CC
All SNPs	74	Lu3-16498084	3	16498084	A	G	G	0.25	0.75	2	89.48	0.18	0.41	ISIS EM-BLASSO	1	PM_2014	1	1
All SNPs	75	Lu3-16821921	3	16821921	C	T	C	0.42	0.42	4	86.16	-0.24	1.63	FASTmrEMMA,mrMLM	2	PM_2012	1	3	Lus10008712/16736745/16739949/RLK;Lus10020500/16881292/16888832/RLK;Lus10033533/16901629/16905201/RLK	Lus10015835/16819966/16822993/phosphoglucomutase, putative
All SNPs	76	Lu3-17628308	3	17628308	T	C	T	0.46	0.46	4	97.36	-0.18	1.12	FASTmrEMMA	1	PM_2014	1	1		Lus10009298/17627547/17629455/LOB domain-containing protein 19
All SNPs	77	Lu3-19020070	3	19020070	A	G	G	0.06	0.94	3	87.55	0.64	1.05	FASTmrMLM	1	PM_2013	1	1	Lus10033857/18931785/18933361/WRKY
All SNPs	78	Lu3-24637381	3	24637381	C	T	T	0.43	0.57	5	48.87	0.48	6.99	FASTmrMLM,pLARmEB	2	PM_2013	1	4	Lus10037729/24681294/24684669/RLK;Lus10037730/24679982/24680260/RLK;Lus10037731/24676809/24679724/RLK;Lus10037736/24656841/24657803/RLK
All SNPs	79	Lu3-24926663	3	24926663	G	A	A	0.12	0.88	3	138.83	0.28	0.45	mrMLM	1	PM_2015	1	4	Lus10037667/25009138/25009785/TNL;Lus10037687/24906994/24907854/RLK;Lus10037688/24905388/24906946/RLK;Lus10037705/24826326/24827432/RLP
All SNPs	80	Lu3-25140484	3	25140484	A	T	T	0.11	0.89	4	55.9	0.77	2.94	pKWmEB	1	PM_Mean	1	1
All SNPs	81	Lu3-25278219	3	25278219	C	A	A	0.08	0.92	4	64.8	0.69	1.75	FASTmrMLM	1	PM_2013	1	1
All SNPs	82	Lu3-25442243	3	25442243	A	C	A	0.5	0.5	3	164.08	-0.08	0.27	mrMLM	1	PM_Mean	1	1	Lus10037562/25427779/25435263/TM-CC
All SNPs	83	Lu4-425140	4	425140	G	C	C	0.26	0.74	4	10.46	0.35	1.66	ISIS EM-BLASSO,mrMLM	2	PM_2014,PM_Mean	2	1		Lus10030213/423806/426390/Rho GTPase activating protein with PAK-box
All SNPs	84	Lu4-427667	4	427667	G	A	G	0.09	0.09	2	96.94	-0.39	0.56	mrMLM,pKWmEB	2	PM_2016	1	1
All SNPs	85	Lu4-509402	4	509402	C	T	C	0.16	0.16	1	71.23	-0.28	0.59	pKWmEB	1	PM_2013	1	1		Lus10030232/504274/509835/Rhamnogalacturonate lyase family protein
All SNPs	86	Lu4-1125053	4	1125053	T	C	C	0.44	0.56	1	228.26	0.03	0.03	ISIS EM-BLASSO,pKWmEB	2	PM_2016	1	2	Lus10030345/1049514/1056697/TNL;Lus10030349/1087389/1090380/DZC
All SNPs	87	Lu4-1960629	4	1960629	A	G	G	0.11	0.89	1	154.08	0.19	0.18	FASTmrEMMA,ISIS EM-BLASSO,pKWmEB	3	PM_2012,PM_Mean	2	1	Lus10009833/2032507/2032956/RLK
All SNPs	88	Lu4-9252639	4	9252639	A	C	C	0.29	0.71	3	31.18	0.3	1.53	pKWmEB	1	PM_2013	1	2	Lus10013039/9303097/9305517/RLK;Lus10013040/9299219/9301601/RLK
All SNPs	89	Lu4-11526385	4	11526385	A	G	A	0.27	0.27	6	33.53	-0.85	10.76	FASTmrEMMA	1	PM_2012	1	3	Lus10036697/11441987/11442748/RLK;Lus10036704/11468188/11468577/RLK;Lus10036725/11582820/11585160/WRKY	Lus10036710/11524694/11530066/nitrate transporter 1:2
All SNPs	90	Lu4-11843167	4	11843167	T	C	T	0.16	0.16	1	41.21	-0.32	0.79	FASTmrMLM,mrMLM,pKWmEB	3	PM_2015,PM_Mean	2	1		Lus10036764/11842218/11843598/RING
All SNPs	91	Lu4-13089700	4	13089700	C	T	T	0.17	0.83	4	110.15	0.32	0.87	FASTmrEMMA,FASTmrMLM,ISIS EM-BLASSO,pKWmEB,pLARmEB	5	PM_2015	1	1
All SNPs	92	Lu4-13869828	4	13869828	C	T	C	0.19	0.19	6	21.94	-0.55	2.85	mrMLM	1	PM_2015	1	2	Lus10034384/13844908/13846808/RLP;Lus10034387/13822157/13825163/TM-CC	Lus10034380/13868577/13869943/ataurora3
All SNPs	93	Lu4-15107754	4	15107754	T	C	T	0.17	0.17	6	38.11	-0.81	5.65	ISIS EM-BLASSO	1	PM_2013	1	3	Lus10041605/15019929/15020549/TIR;Lus10041606/15023270/15024256/TNL;Lus10041639/15185355/15189194/RLK
All SNPs	94	Lu4-15155007	4	15155007	A	C	A	0.47	0.47	4	52.24	-0.17	1.01	FASTmrEMMA,pLARmEB	2	PM_2016	1	1	Lus10041639/15185355/15189194/RLK
All SNPs	95	Lu4-17170235	4	17170235	C	T	T	0.29	0.71	6	42.76	0.81	10.75	mrMLM	1	PM_Mean	1	5	Lus10004040/17129426/17131616/RLK;Lus10004046/17091433/17094723/RLK;Lus10009107/17141532/17146187/TNL;Lus10009108/17146906/17147707/TNL;Lus10009109/17147750/17148367/TNL
All SNPs	96	Lu4-17357649	4	17357649	G	A	A	0.34	0.66	2	75.02	0.18	0.69	FASTmrMLM,pKWmEB,pLARmEB	3	PM_2016	1	1	Lus10020779/17305881/17309057/CNL
All SNPs	97	Lu4-17544044	4	17544044	C	T	C	0.17	0.17	5	41.35	-0.66	3.72	ISIS EM-BLASSO,pKWmEB	2	PM_2015	1	1		Lus10020729/17539568/17547070/PHYTOENE SYNTHASE
All SNPs	98	Lu4-17946054	4	17946054	A	G	G	0.06	0.94	4	74.98	0.83	1.72	pLARmEB	1	PM_2012	1	1	Lus10029905/18025000/18027107/TM-CC	Lus10020648/17945587/17947034/Rubber elongation factor protein (REF)
All SNPs	99	Lu4-18020755	4	18020755	A	G	G	0.22	0.78	6	50.03	0.65	4.85	ISIS EM-BLASSO	1	PM_2014	1	3	Lus10029905/18025000/18027107/TM-CC;Lus10029919/18100856/18101804/TNL;Lus10029921/18109092/18112034/TNL
All SNPs	100	Lu4-19237210	4	19237210	C	A	A	0.11	0.89	4	65.26	0.74	2.81	FASTmrMLM	1	PM_2014	1	2	Lus10039762/19186606/19189026/RLK;Lus10039767/19198756/19201861/RLK
All SNPs	101	Lu4-19244900	4	19244900	G	C	C	0.17	0.83	4	64.63	0.51	2.06	pKWmEB	1	PM_2014	1	2	Lus10039762/19186606/19189026/RLK;Lus10039767/19198756/19201861/RLK
All SNPs	102	Lu5-453626	5	453626	T	C	T	0.35	0.35	6	38.51	-0.9	17.52	FASTmrMLM	1	PM_2013	1	1
All SNPs	103	Lu5-1333779	5	1333779	A	T	T	0.16	0.84	5	59.83	0.69	3.63	FASTmrMLM	1	PM_2014	1	2	Lus10029704/1291080/1292029/CNL;Lus10029705/1289543/1290535/CNL
All SNPs	104	Lu5-1333995	5	1333995	C	T	C	0.45	0.55	5	55.15	-0.28	3.72	FarmCPU	1	PM_Mean	1	2	Lus10029704/1291080/1292029/CNL;Lus10029705/1289543/1290535/CNL
All SNPs	105	Lu5-1402378	5	1402378	A	G	A	0.48	0.52	6	38.97	-0.48	9.96	pLARmEB	1	PM_2016	1	1	Lus10004747/1449598/1453554/TNL	Lus10004757/1401419/1407279/alpha
All SNPs	107	Lu5-1552921	5	1552921	C	T	C	0.49	0.49	6	33.28	-0.62	15	pKWmEB	1	PM_2013	1	5	Lus10004719/1568734/1573096/TNL;Lus10004726/1535502/1538672/TNL;Lus10004727/1534218/1535440/TNL;Lus10004747/1449598/1453554/TNL;Lus10008500/1642118/1644046/TM-CC
All SNPs	108	Lu5-1763832	5	1763832	G	T	G	0.45	0.45	6	28.98	-0.7	16.34	ISIS EM-BLASSO	1	PM_Mean	1	1	Lus10008486/1714708/1718110/RLK
All SNPs	109	Lu5-1863116	5	1863116	T	C	T	0.36	0.36	6	46.03	-0.57	7.25	FarmCPU	1	PM_Mean	1	1	Lus10029585/1900103/1900468/DIR
All SNPs	110	Lu5-2037910	5	2037910	T	C	T	0.47	0.47	6	51.9	-0.55	10.65	FASTmrMLM	1	PM_2013	1	1		Lus10002961/2035323/2038464/hydroxymethylglutaryl-CoA synthase
All SNPs	111	Lu5-2924824	5	2924824	T	A	T	0.42	0.42	6	58.64	-0.51	7.82	FASTmrEMMA	1	PM_2013	1	2	Lus10032303/3005188/3006765/WRKY;Lus10032306/3015482/3018758/RLK
All SNPs	112	Lu5-2984120	5	2984120	T	C	T	0.48	0.52	6	57.6	-0.37	6.08	FASTmrEMMA	1	PM_2012	1	3	Lus10032303/3005188/3006765/WRKY;Lus10032306/3015482/3018758/RLK;Lus10032310/3052566/3053123/DIR	Lus10032299/2983902/2984287/S-adenosyl-L-methionine-dependent methyltransferases superfamily protein
All SNPs	113	Lu5-3281960	5	3281960	T	C	T	0.33	0.33	6	31.43	-0.96	18.38	mrMLM,pLARmEB	2	PM_2014	1	3	Lus10032345/3206387/3209792/TM-CC;Lus10032351/3223137/3225286/RLK;Lus10032372/3336787/3338055/WRKY
All SNPs	114	Lu5-3299224	5	3299224	G	A	A	0.19	0.81	5	76.19	0.51	2.42	pLARmEB	1	PM_2014	1	3	Lus10032345/3206387/3209792/TM-CC;Lus10032351/3223137/3225286/RLK;Lus10032372/3336787/3338055/WRKY
All SNPs	115	Lu5-3680984	5	3680984	C	T	T	0.17	0.83	5	41.59	0.61	3.06	ISIS EM-BLASSO,pKWmEB	2	PM_2015	1	1
All SNPs	116	Lu5-5549028	5	5549028	A	C	A	0.37	0.37	6	41.93	-0.85	17.3	FASTmrEMMA,FASTmrMLM	2	PM_2013	1	1
All SNPs	117	Lu5-9421448	5	9421448	G	A	G	0.48	0.52	6	50.93	-0.37	6.04	pKWmEB	1	PM_2015	1	1
All SNPs	118	Lu5-10415251	5	10415251	C	T	C	0.42	0.58	6	35.97	-0.46	11.87	FASTmrMLM,pLARmEB	2	PM_2015,PM_Mean	2	1
All SNPs	119	Lu5-11130392	5	11130392	A	G	A	0.24	0.24	6	28.27	-1.44	26.93	FarmCPU,mrMLM,pKWmEB	3	PM_2015,PM_Mean	2	1
All SNPs	120	Lu5-11927728	5	11927728	G	A	A	0.25	0.75	6	44.41	0.7	6.44	ISIS EM-BLASSO	1	PM_Mean	1	2	Lus10035284/11928683/11929954/RLK;Lus10035286/11946804/11949399/WRKY
All SNPs	121	Lu5-12090990	5	12090990	T	G	T	0.32	0.32	6	35.82	-1.07	21.28	FASTmrEMMA,FASTmrMLM,pLARmEB	3	PM_2014,PM_Mean	2	1
All SNPs	122	Lu5-12195919	5	12195919	T	C	T	0.34	0.34	6	38.89	-0.87	16.12	pLARmEB	1	PM_2014	1	1
All SNPs	123	Lu5-12213907	5	12213907	C	T	T	0.31	0.69	6	47.11	0.64	7.6	ISIS EM-BLASSO	1	PM_2014	1	1
All SNPs	124	Lu5-14736164	5	14736164	C	T	T	0.35	0.65	6	63.41	0.51	5.46	FarmCPU,GLM,ISIS EM-BLASSO	3	PM_2013	1	2	Lus10028407/14775502/14778154/RLK;Lus10028440/14645525/14648823/MLO
All SNPs	125	Lu5-14835625	5	14835625	G	C	G	0.5	0.5	5	66.5	-0.36	5.15	FASTmrEMMA,FASTmrMLM,ISIS EM-BLASSO,mrMLM	4	PM_2016	1	1	Lus10028407/14775502/14778154/RLK	Lus10028399/14834790/14837729/ankyrin repeat protein
All SNPs	126	Lu5-14967901	5	14967901	G	A	G	0.48	0.52	6	36	-0.63	17.28	ISIS EM-BLASSO,mrMLM	2	PM_2015	1	1	Lus10028359/15020577/15021749/RLP	Lus10028364/14967268/14969126/Pectin lyase-like superfamily protein
All SNPs	127	Lu5-14977699	5	14977699	G	A	G	0.46	0.54	6	31.84	-0.59	16.32	pLARmEB	1	PM_Mean	1	2	Lus10028347/15077659/15081716/RLK;Lus10028359/15020577/15021749/RLP	Lus10028362/14975372/14977773/Unknown
All SNPs	128	Lu5-15681773	5	15681773	C	T	C	0.41	0.41	6	40.21	-0.56	8.71	FASTmrEMMA	1	PM_2012	1	7	Lus10024060/15601599/15607466/RLK;Lus10024061/15611592/15617378/RLK;Lus10024062/15624852/15631121/RLK;Lus10024063/15635008/15648806/RLK;Lus10024064/15650262/15653487/RLK;Lus10024074/15698530/15699898/WRKY;Lus10024081/15725123/15728803/RLK
All SNPs	129	Lu5-15697144	5	15697144	T	C	T	0.33	0.33	6	36.88	-1.12	25.18	FASTmrMLM,GLM,pLARmEB	3	PM_2013	1	7	Lus10024060/15601599/15607466/RLK;Lus10024061/15611592/15617378/RLK;Lus10024062/15624852/15631121/RLK;Lus10024063/15635008/15648806/RLK;Lus10024064/15650262/15653487/RLK;Lus10024074/15698530/15699898/WRKY;Lus10024081/15725123/15728803/RLK
All SNPs	130	Lu5-16602027	5	16602027	T	C	T	0.31	0.31	6	37.01	-1.07	20.88	FASTmrEMMA	1	PM_2013	1	1	Lus10039641/16636867/16641182/RLK
All SNPs	131	Lu5-16840013	5	16840013	T	A	T	0.24	0.24	6	25.12	-1.52	29.67	FASTmrMLM	1	PM_2015	1	2	Lus10039698/16922051/16922660/RLK;Lus10039699/16923316/16925783/RLK
All SNPs	132	Lu6-958453	6	958453	T	C	C	0.11	0.89	1	163.06	0.16	0.13	FASTmrMLM,ISIS EM-BLASSO	2	PM_2014	1	1
All SNPs	133	Lu6-1397678	6	1397678	T	C	C	0.29	0.71	4	109.58	0.31	1.65	ISIS EM-BLASSO	1	PM_2014	1	1		Lus10033717/1396599/1398320/Chalcone and stilbene synthase family protein
All SNPs	134	Lu6-1409858	6	1409858	C	T	T	0.19	0.81	6	39.27	1.01	9.55	FASTmrMLM,pLARmEB	2	PM_2014	1	1
All SNPs	135	Lu6-1431775	6	1431775	A	C	C	0.06	0.94	5	38.44	1.06	2.66	FASTmrMLM,ISIS EM-BLASSO,pKWmEB	3	PM_2013,PM_Mean	2	1		Lus10033710/1428780/1434841/transducin family protein
All SNPs	136	Lu6-1477233	6	1477233	T	A	A	0.38	0.62	4	93.91	0.28	1.92	FASTmrEMMA,mrMLM	2	PM_2014	1	1		Lus10033702/1475818/1477503/Major facilitator superfamily protein
All SNPs	137	Lu6-2088512	6	2088512	T	C	C	0.19	0.81	1	101.09	0.26	0.62	FASTmrEMMA,ISIS EM-BLASSO,pKWmEB,pLARmEB	4	PM_2014	1	1	Lus10017611/2049388/2051511/RLK	Lus10017600/2086860/2088840/alpha
All SNPs	138	Lu6-3267375	6	3267375	T	C	C	0.13	0.87	6	52.54	0.92	5.14	FASTmrEMMA	1	PM_2013	1	1	Lus10019453/3366421/3373233/RLK
All SNPs	139	Lu6-5384325	6	5384325	A	T	T	0.16	0.84	3	74.8	0.45	1.6	mrMLM	1	PM_2014	1	2	Lus10032438/5482883/5483860/RLK;Lus10032449/5352043/5356399/TM-CC
All SNPs	140	Lu6-5796778	6	5796778	A	G	G	0.14	0.86	4	49.94	0.61	2.41	ISIS EM-BLASSO	1	PM_2013	1	2	Lus10017727/5829864/5832029/RLP;Lus10036672/5718165/5721746/RLK
All SNPs	141	Lu6-6053280	6	6053280	A	G	A	0.34	0.34	5	59.86	-0.33	2.34	mrMLM	1	PM_2015	1	1
All SNPs	142	Lu6-7534641	6	7534641	T	C	T	0.44	0.56	5	43.91	-0.31	5.09	pLARmEB	1	PM_2014	1	1
All SNPs	143	Lu6-9179733	6	9179733	A	G	A	0.45	0.45	5	49.95	-0.3	2.89	FASTmrEMMA,pLARmEB	2	PM_Mean	1	1
All SNPs	144	Lu6-14331771	6	14331771	G	T	G	0.44	0.44	6	37.12	-0.54	9.32	FarmCPU	1	PM_2013	1	1		Lus10014131/14330927/14332739/Unknown
All SNPs	145	Lu6-14339498	6	14339498	A	G	A	0.5	0.5	6	45.52	-0.46	8.44	mrMLM	1	PM_2015	1	3	Lus10025063/14432270/14433022/DIR;Lus10025064/14436889/14437416/DIR;Lus10025065/14438998/14439717/DIR
All SNPs	146	Lu6-14405712	6	14405712	T	A	T	0.46	0.46	6	35.41	-0.44	6.65	pLARmEB	1	PM_2014	1	4	Lus10025063/14432270/14433022/DIR;Lus10025064/14436889/14437416/DIR;Lus10025065/14438998/14439717/DIR;Lus10025067/14443424/14444014/DIR
All SNPs	147	Lu6-14925268	6	14925268	A	C	C	0.24	0.76	2	108.16	0.22	0.6	FASTmrMLM	1	PM_2013	1	1
All SNPs	148	Lu6-15632865	6	15632865	C	A	C	0.35	0.35	1	190.66	-0.05	0.05	FASTmrMLM,ISIS EM-BLASSO	2	PM_2016	1	1
All SNPs	149	Lu6-15634103	6	15634103	A	G	A	0.38	0.38	2	40.8	-0.23	1.26	FASTmrEMMA,FASTmrMLM,mrMLM,pLARmEB	4	PM_2014,PM_Mean	2	1
All SNPs	150	Lu6-16837004	6	16837004	G	A	G	0.44	0.44	6	41.09	-0.36	4.15	pLARmEB	1	PM_2013	1	1	Lus10025242/16773894/16774565/RLK
All SNPs	151	Lu6-16849336	6	16849336	T	G	T	0.28	0.28	6	18.48	-0.56	5.03	mrMLM	1	PM_2012	1	2	Lus10025242/16773894/16774565/RLK;Lus10025274/16937894/16938394/DIR
All SNPs	152	Lu6-17011481	6	17011481	T	C	T	0.43	0.43	1	135.46	-0.11	0.4	FASTmrEMMA	1	PM_2015	1	2	Lus10025274/16937894/16938394/DIR;Lus10025281/16958731/16960974/TM-CC
All SNPs	153	Lu6-17035443	6	17035443	T	C	C	0.44	0.56	1	459.21	0.03	0.02	FASTmrMLM	1	PM_2015	1	2	Lus10025274/16937894/16938394/DIR;Lus10025281/16958731/16960974/TM-CC
All SNPs	154	Lu6-17056600	6	17056600	A	G	G	0.24	0.76	2	86.84	0.28	1.01	ISIS EM-BLASSO,pKWmEB,pLARmEB	3	PM_2015	1	1	Lus10025281/16958731/16960974/TM-CC
All SNPs	155	Lu6-17111742	6	17111742	C	G	G	0.34	0.66	4	58.65	0.4	3.25	pLARmEB	1	PM_2014	1	1
All SNPs	156	Lu7-2731752	7	2731752	C	T	T	0.11	0.89	6	15.95	1.14	6.28	pKWmEB	1	PM_2014	1	1	Lus10012193/2695771/2698659/RLK
All SNPs	157	Lu7-2864158	7	2864158	A	G	G	0.36	0.64	4	76.25	0.32	2.41	FASTmrEMMA	1	PM_2015	1	1	Lus10011302/2838905/2841730/RLK
All SNPs	158	Lu7-3165532	7	3165532	T	C	C	0.08	0.92	3	32.42	0.66	1.53	pKWmEB	1	PM_2013	1	1
All SNPs	159	Lu7-3425810	7	3425810	A	T	T	0.33	0.67	4	23.32	0.29	1.7	FASTmrMLM,mrMLM	2	PM_2016	1	2	Lus10023487/3467614/3471603/TNL;Lus10023506/3368906/3372339/MLO
All SNPs	160	Lu7-3823906	7	3823906	G	A	A	0.15	0.85	3	79.44	0.4	1.14	pKWmEB	1	PM_2014	1	1		Lus10023415/3823122/3824021/ENTH
All SNPs	161	Lu7-3830168	7	3830168	C	A	C	0.34	0.34	6	35.6	-0.75	11.35	FASTmrEMMA,pLARmEB	2	PM_2013	1	1
All SNPs	162	Lu7-4199463	7	4199463	T	C	C	0.19	0.81	4	46.99	0.57	3.12	pKWmEB	1	PM_2015	1	1
All SNPs	163	Lu7-4199485	7	4199485	A	C	C	0.22	0.78	5	41.66	0.62	4.46	FASTmrMLM	1	PM_2015	1	1
All SNPs	164	Lu7-4389073	7	4389073	T	C	C	0.44	0.56	3	54.28	0.16	0.77	FASTmrEMMA,FASTmrMLM	2	PM_2016	1	6	Lus10040184/4450196/4451089/RLK;Lus10040185/4447672/4450144/RLK;Lus10040186/4443831/4446900/RLK;Lus10040196/4376947/4380527/TM-CC;Lus10040208/4311389/4312487/CNL;Lus10040210/4309085/4309381/CNL
All SNPs	165	Lu7-4927223	7	4927223	G	T	T	0.39	0.61	6	50.84	0.64	10.48	pLARmEB	1	PM_2014	1	1
All SNPs	166	Lu7-6128965	7	6128965	C	T	C	0.34	0.34	2	73.61	-0.15	0.47	FASTmrMLM	1	PM_2015	1	1
All SNPs	167	Lu7-6615824	7	6615824	G	A	A	0.2	0.8	4	63.78	0.65	4.39	FASTmrMLM	1	PM_2014	1	1
All SNPs	168	Lu7-7041879	7	7041879	T	A	T	0.44	0.44	6	42.67	-0.65	13.12	FASTmrMLM	1	PM_2012	1	1		Lus10024477/7040717/7044256/ERD (early-responsive to dehydration stress) family protein
All SNPs	169	Lu7-7556076	7	7556076	A	G	G	0.32	0.68	2	53.54	0.27	1.35	pLARmEB	1	PM_2015	1	1	Lus10006028/7619941/7623178/RLK	Lus10005498/7540217/7564575/ENTH
All SNPs	170	Lu7-13469592	7	13469592	G	A	G	0.35	0.35	4	105.53	-0.19	0.78	pLARmEB	1	PM_2012	1	1
All SNPs	171	Lu7-17007593	7	17007593	C	T	C	0.28	0.28	6	31.28	-1.21	22.62	pLARmEB	1	PM_2013	1	3	Lus10015461/16979755/16981169/MLO;Lus10015465/16967785/16968282/TNL;Lus10015472/16928445/16928858/RLK	Lus10015454/17006897/17014499/ZPR1 zinc-finger domain protein
All SNPs	172	Lu7-17083681	7	17083681	T	G	G	0.16	0.84	3	89.27	0.58	2.65	ISIS EM-BLASSO,mrMLM	2	PM_2012	1	1		Lus10001604/17078700/17088126/phototropin 2
All SNPs	173	Lu7-17221701	7	17221701	G	A	A	0.44	0.56	4	43.62	0.29	2.72	FASTmrEMMA,FASTmrMLM,ISIS EM-BLASSO,mrMLM,pKWmEB	5	PM_2015,PM_Mean	2	1
All SNPs	174	Lu7-17659649	7	17659649	A	G	G	0.09	0.91	6	26.37	1.12	4.85	FASTmrMLM,ISIS EM-BLASSO,pKWmEB,pLARmEB	4	PM_2015,PM_Mean	2	1	Lus10003971/17657006/17660870/TM-CC	Lus10003971/17657006/17660870/non-intrinsic ABC protein 9	Lus10003971/17657006/17660870/TM-CC
All SNPs	175	Lu8-3374731	8	3374731	C	A	C	0.11	0.11	1	427.17	-0.14	0.1	pKWmEB,pLARmEB	2	PM_2015	1	1		Lus10026549/3373907/3375181/Transmembrane amino acid transporter family protein
All SNPs	176	Lu8-9130049	8	9130049	T	A	T	0.46	0.46	6	44.7	-0.5	8.38	ISIS EM-BLASSO,mrMLM	2	PM_2014	1	1
All SNPs	177	Lu8-14560362	8	14560362	A	G	A	0.15	0.15	4	67.6	-0.39	1.12	mrMLM	1	PM_2013	1	1	Lus10016649/14505473/14508403/TM-CC	Lus10016660/14560110/14560543/2-oxoglutarate (2OG) and Fe(II)-dependent oxygenase superfamily protein
All SNPs	178	Lu8-15501082	8	15501082	T	C	T	0.15	0.15	1	48.63	-0.27	0.54	pKWmEB,pLARmEB	2	PM_2013	1	1		Lus10011824/15500471/15501143/phosphoenolpyruvate carboxylase kinase 1
All SNPs	179	Lu8-15503742	8	15503742	C	A	C	0.16	0.16	1	53.09	-0.31	0.7	FASTmrEMMA	1	PM_2013	1	1		Lus10011825/15502553/15503819/Unknown
All SNPs	180	Lu8-15837449	8	15837449	T	A	A	0.07	0.93	4	20.86	0.87	2.44	pKWmEB	1	PM_2016	1	2	Lus10022243/15884227/15885568/TM-CC;Lus10022244/15885633/15886882/TM-CC
All SNPs	181	Lu8-15998682	8	15998682	A	T	T	0.12	0.88	1	59.62	0.39	0.85	ISIS EM-BLASSO	1	PM_2016	1	2	Lus10022265/15999079/16001545/RLK;Lus10022278/16084319/16084564/WRKY
All SNPs	182	Lu8-16129107	8	16129107	T	C	T	0.12	0.12	5	52.01	-0.84	3.77	ISIS EM-BLASSO	1	PM_2014	1	3	Lus10022278/16084319/16084564/WRKY;Lus10022285/16118594/16119337/RLK;Lus10022286/16119574/16121020/RLK	Lus10022289/16128500/16131450/uridine kinase-like 5
All SNPs	183	Lu8-17273177	8	17273177	A	G	G	0.38	0.62	5	52.36	0.35	3.03	FASTmrEMMA	1	PM_2013	1	1
All SNPs	184	Lu8-17836195	8	17836195	C	T	T	0.33	0.67	4	109.17	0.26	1.37	ISIS EM-BLASSO	1	PM_2015	1	1
All SNPs	185	Lu8-17917993	8	17917993	A	G	A	0.38	0.38	5	56.75	-0.44	4.85	mrMLM	1	PM_2014	1	1		Lus10011031/17917831/17919029/myb domain protein 9
All SNPs	186	Lu8-17997267	8	17997267	A	C	A	0.39	0.39	3	87.2	-0.22	1.2	pKWmEB	1	PM_2014	1	1	Lus10010992/18086260/18088674/RLK
All SNPs	187	Lu8-18946459	8	18946459	C	A	C	0.36	0.36	1	478.07	-0.05	0.05	FASTmrEMMA,FASTmrMLM,pLARmEB	3	PM_2016	1	3	Lus10002247/19020694/19023979/TNL;Lus10002248/19028964/19030371/NL;Lus10002249/19037487/19042009/TNL	Lus10002230/18945736/18947725/tetraspanin10
All SNPs	188	Lu8-18951212	8	18951212	T	A	T	0.49	0.51	6	35.11	-0.55	12.48	pLARmEB	1	PM_2012,PM_Mean	2	4	Lus10002247/19020694/19023979/TNL;Lus10002248/19028964/19030371/NL;Lus10002249/19037487/19042009/TNL;Lus10002250/19046619/19047488/TNL
All SNPs	189	Lu8-19040276	8	19040276	G	A	G	0.19	0.19	6	28.07	-1.3	15.67	FASTmrEMMA,FASTmrMLM,mrMLM,pLARmEB	4	PM_2016	1	4	Lus10002247/19020694/19023979/TNL;Lus10002248/19028964/19030371/NL;Lus10002249/19037487/19042009/TNL;Lus10002250/19046619/19047488/TNL	Lus10002249/19037487/19042009/Disease resistance protein (TIR-NBS-LRR class) family	Lus10002249/19037487/19042009/TNL
All SNPs	190	Lu8-19197787	8	19197787	C	T	T	0.34	0.66	2	163.54	0.1	0.22	mrMLM	1	PM_2014	1	1	Lus10006317/19172422/19173282/DIR
All SNPs	191	Lu8-19331448	8	19331448	A	G	A	0.22	0.22	3	76.52	-0.29	0.97	FASTmrEMMA,mrMLM,pKWmEB	3	PM_2014,PM_Mean	2	1
All SNPs	192	Lu8-20086552	8	20086552	G	T	T	0.08	0.92	2	167.48	0.27	0.25	FASTmrMLM	1	PM_2015	1	1		Lus10024609/20085039/20087072/flavin-monooxygenase glucosinolate S-oxygenase 3
All SNPs	193	Lu8-22034371	8	22034371	A	G	G	0.39	0.61	5	31.83	0.3	2.27	mrMLM	1	PM_2015	1	2	Lus10006610/22013669/22014085/RLP;Lus10006611/22017713/22018966/RLP
All SNPs	194	Lu8-23605626	8	23605626	C	G	C	0.24	0.24	3	43.56	-0.32	1.31	FASTmrMLM,pKWmEB,pLARmEB	3	PM_2016	1	10	Lus10018377/23643099/23647937/RLK;Lus10018378/23642395/23642996/RLK;Lus10018379/23632142/23635799/RLK;Lus10018380/23628565/23630110/RLK;Lus10018381/23627590/23628563/RLK;Lus10018382/23623813/23626346/RLK;Lus10018402/23532325/23535966/RLK;Lus10018406/23513943/23517004/RLK;Lus10018407/23510740/23513809/RLK;Lus10018408/23505978/23510072/RLK
All SNPs	195	Lu9-1068580	9	1068580	A	G	A	0.37	0.37	4	106.18	-0.18	0.76	FASTmrEMMA,pLARmEB	2	PM_2012	1	2	Lus10007516/981387/984278/RLK;Lus10028980/1084029/1084604/RLK
All SNPs	196	Lu9-1650262	9	1650262	C	T	T	0.34	0.66	4	26.63	0.33	2.26	pLARmEB	1	PM_2014	1	1		Lus10008937/1648559/1652441/Plant invertase
All SNPs	197	Lu9-1696070	9	1696070	C	T	C	0.24	0.24	3	48.63	-0.36	1.69	pLARmEB	1	PM_2013	1	1
All SNPs	198	Lu9-1999100	9	1999100	T	G	G	0.29	0.71	5	34.45	0.27	1.21	mrMLM	1	PM_2015	1	1	Lus10017478/2046907/2049680/RLK
All SNPs	199	Lu9-2601769	9	2601769	T	C	T	0.2	0.2	4	60.48	-0.44	1.98	ISIS EM-BLASSO	1	PM_2016	1	1
All SNPs	200	Lu9-3040038	9	3040038	G	T	G	0.45	0.55	1	204.39	-0.07	0.22	FASTmrMLM	1	PM_2015	1	2	Lus10007587/3083474/3088890/RLK;Lus10007596/3042912/3049492/EDR
All SNPs	201	Lu9-3234392	9	3234392	A	C	C	0.12	0.88	1	84.53	0.33	0.59	mrMLM	1	PM_2014	1	1	Lus10007543/3295804/3298169/RLK
All SNPs	202	Lu9-3389033	9	3389033	A	G	A	0.42	0.42	2	102.22	-0.14	0.61	FASTmrEMMA,mrMLM,pKWmEB	3	PM_Mean	1	2	Lus10007543/3295804/3298169/RLK;Lus10040500/3458671/3461533/RLK
All SNPs	203	Lu9-3920670	9	3920670	T	C	T	0.15	0.15	6	27.31	-1.75	20.89	FASTmrMLM	1	PM_2012	1	1	Lus10040388/4010807/4014021/MLO
All SNPs	204	Lu9-4948236	9	4948236	T	C	C	0.21	0.79	6	43.43	1	10.59	mrMLM,pLARmEB	2	PM_2012	1	2	Lus10028279/4972365/4975644/CNL;Lus10028292/5039187/5042259/TM-CC
All SNPs	205	Lu9-5067368	9	5067368	A	G	A	0.44	0.44	6	61.85	-0.32	3.2	mrMLM	1	PM_2013	1	3	Lus10004388/5131906/5138235/RLK;Lus10028279/4972365/4975644/CNL;Lus10028292/5039187/5042259/TM-CC	Lus10028297/5064708/5069176/Cytochrome P450 superfamily protein
All SNPs	207	Lu9-5645823	9	5645823	T	G	G	0.13	0.87	2	153.82	0.29	0.49	pKWmEB	1	PM_2013	1	1		Lus10030945/5644271/5648856/nitrate transporter 1.5
All SNPs	208	Lu9-6273089	9	6273089	G	A	A	0.08	0.92	2	128.35	0.37	0.46	ISIS EM-BLASSO	1	PM_2015	1	1	Lus10031043/6265980/6269593/RLK
All SNPs	209	Lu9-8499442	9	8499442	T	G	T	0.43	0.43	6	36.77	-0.66	13.4	FASTmrMLM	1	PM_2014	1	1	Lus10011609/8529175/8532321/RLK
All SNPs	210	Lu9-8516150	9	8516150	T	C	T	0.48	0.52	6	51.3	-0.43	7.96	pKWmEB	1	PM_2012	1	1	Lus10011609/8529175/8532321/RLK
All SNPs	211	Lu9-12181658	9	12181658	G	A	G	0.44	0.56	5	64.29	-0.27	3.74	ISIS EM-BLASSO	1	PM_2012	1	1
All SNPs	212	Lu9-17006288	9	17006288	G	A	A	0.2	0.8	5	41.79	0.51	2.62	ISIS EM-BLASSO	1	PM_2012	1	1		Lus10042594/17006252/17006503/ARM repeat superfamily protein
All SNPs	213	Lu9-18464274	9	18464274	C	T	C	0.43	0.43	3	6.19	-0.25	1.87	FASTmrEMMA	1	PM_2016	1	1	Lus10007722/18512773/18516667/TNL
All SNPs	214	Lu9-18489770	9	18489770	A	G	A	0.23	0.23	2	175.72	-0.17	0.34	pLARmEB	1	PM_2016	1	1	Lus10007722/18512773/18516667/TNL
All SNPs	215	Lu9-19041467	9	19041467	C	T	T	0.39	0.61	6	49.87	0.61	9.78	FASTmrMLM,mrMLM	2	PM_2013	1	1		Lus10024830/19040399/19041541/calmodulin 8
All SNPs	216	Lu9-19185021	9	19185021	A	G	A	0.47	0.47	5	52.49	-0.33	3.99	FASTmrMLM	1	PM_2014	1	1	Lus10024864/19227035/19228510/WRKY
All SNPs	217	Lu9-19422735	9	19422735	G	A	A	0.32	0.68	1	215.85	0.04	0.03	mrMLM	1	PM_Mean	1	2	Lus10024886/19349782/19354051/TNL;Lus10024900/19428084/19428923/RLK
All SNPs	218	Lu9-19613298	9	19613298	T	C	C	0.08	0.92	4	109.49	0.57	1.1	FASTmrEMMA	1	PM_2012	1	1		Lus10024937/19611604/19613474/RNA-binding (RRM
All SNPs	219	Lu9-19697038	9	19697038	A	G	A	0.1	0.1	1	245.37	-0.07	0.02	FASTmrMLM,ISIS EM-BLASSO,pLARmEB	3	PM_2013	1	1	Lus10024965/19729257/19735152/TM-CC
All SNPs	220	Lu9-20701159	9	20701159	G	A	G	0.29	0.29	6	33.92	-1.11	20.69	FarmCPU	1	PM_2013	1	1		Lus10009543/20699726/20701390/Unknown
All SNPs	221	Lu10-419873	10	419873	C	T	T	0.22	0.78	4	61.18	0.5	2.95	ISIS EM-BLASSO	1	PM_Mean	1	1		Lus10009674/417212/420274/XB3 ortholog 5 in Arabidopsis thaliana
All SNPs	222	Lu10-723479	10	723479	G	C	C	0.3	0.7	5	53.49	0.51	4.52	FASTmrMLM	1	PM_2014	1	1	Lus10031860/777431/781117/RLK	Lus10031878/722289/723586/DNAse I-like superfamily protein
All SNPs	223	Lu10-1529907	10	1529907	T	C	T	0.43	0.57	5	65.07	-0.24	3.09	FASTmrMLM	1	PM_2016	1	2	Lus10031702/1554451/1554951/RLK;Lus10031703/1550969/1553607/RLK
All SNPs	224	Lu10-3343937	10	3343937	A	T	T	0.11	0.89	3	55.72	0.73	2.64	FASTmrEMMA	1	PM_2013	1	1
All SNPs	225	Lu10-4528006	10	4528006	G	C	G	0.43	0.43	6	50.21	-0.56	9.37	FASTmrMLM,pLARmEB	2	PM_2013	1	1
All SNPs	226	Lu10-4673669	10	4673669	T	C	T	0.39	0.39	6	41.99	-0.38	3.66	mrMLM	1	PM_2013	1	1
All SNPs	227	Lu10-5857747	10	5857747	G	T	G	0.39	0.39	4	39.19	-0.29	2.14	FASTmrMLM	1	PM_2015	1	1
All SNPs	228	Lu10-10155202	10	10155202	T	C	C	0.09	0.91	1	67.29	0.37	0.54	pKWmEB	1	PM_2013	1	1
All SNPs	229	Lu10-11682031	10	11682031	A	G	A	0.26	0.26	6	28.73	-0.93	11.97	FASTmrMLM,ISIS EM-BLASSO,mrMLM,pLARmEB	4	PM_2015	1	2	Lus10032759/11656882/11659758/CNL;Lus10032761/11673977/11677049/RLK
All SNPs	230	Lu10-11695343	10	11695343	T	C	C	0.44	0.56	6	39.44	0.64	13.03	FASTmrEMMA,FASTmrMLM,mrMLM,pKWmEB,pLARmEB	5	PM_2013	1	2	Lus10032759/11656882/11659758/CNL;Lus10032761/11673977/11677049/RLK
All SNPs	231	Lu10-11715154	10	11715154	G	A	A	0.29	0.71	5	48.1	0.68	7.51	pLARmEB	1	PM_2014	1	2	Lus10032759/11656882/11659758/CNL;Lus10032761/11673977/11677049/RLK
All SNPs	232	Lu10-13223783	10	13223783	T	C	C	0.17	0.83	2	194.21	0.13	0.15	FASTmrMLM	1	PM_2016	1	1
All SNPs	233	Lu10-13226627	10	13226627	A	T	A	0.2	0.2	6	18.38	-1.05	11.04	pLARmEB	1	PM_2014	1	1
All SNPs	234	Lu10-13464791	10	13464791	C	T	T	0.39	0.61	3	44.31	0.24	1.47	FASTmrEMMA,FASTmrMLM,pKWmEB,pLARmEB	4	PM_2016	1	2	Lus10042678/13473657/13475711/RLK;Lus10042679/13476414/13478339/RLK	Lus10042676/13461579/13465124/Major facilitator superfamily protein
All SNPs	235	Lu10-13583337	10	13583337	C	T	C	0.35	0.35	5	76.12	-0.35	2.69	FASTmrEMMA	1	PM_2014	1	1
All SNPs	236	Lu10-13703428	10	13703428	C	T	T	0.17	0.83	4	45.9	0.47	1.8	pLARmEB	1	PM_2015	1	1	Lus10042714/13695454/13699694/TNL
All SNPs	237	Lu10-16094406	10	16094406	A	T	A	0.49	0.51	2	64.21	-0.14	0.84	ISIS EM-BLASSO,pLARmEB	2	PM_2016	1	1	Lus10022900/16154230/16157202/CNL
All SNPs	238	Lu10-16129328	10	16129328	A	G	G	0.44	0.56	5	69.17	0.36	4.17	FASTmrEMMA,FASTmrMLM	2	PM_2013	1	1	Lus10022900/16154230/16157202/CNL
All SNPs	239	Lu10-16137842	10	16137842	T	G	T	0.5	0.5	6	54.84	-0.4	6.41	pLARmEB	1	PM_2013	1	1	Lus10022900/16154230/16157202/CNL
All SNPs	240	Lu10-16605319	10	16605319	C	T	C	0.42	0.42	1	81.29	-0.15	0.62	pLARmEB	1	PM_2016	1	2	Lus10022792/16697026/16699986/CNL;Lus10022808/16618069/16621111/TM-CC
All SNPs	241	Lu10-16759890	10	16759890	A	C	A	0.13	0.13	4	49.61	-0.57	1.96	pLARmEB	1	PM_2014	1	1	Lus10022792/16697026/16699986/CNL
All SNPs	242	Lu11-262510	11	262510	G	C	C	0.12	0.88	2	111.45	0.31	0.5	mrMLM	1	PM_2015	1	2	Lus10027353/174231/177125/TM-CC;Lus10027354/169159/172623/TM-CC
All SNPs	243	Lu11-603845	11	603845	A	G	G	0.09	0.91	1	69.06	0.28	0.32	FarmCPU	1	PM_Mean	1	2	Lus10027230/665690/667318/RLK;Lus10027239/634273/635683/RLP
All SNPs	244	Lu11-620390	11	620390	G	T	T	0.3	0.7	5	45.19	0.43	3.22	FASTmrMLM,pKWmEB	2	PM_2012	1	2	Lus10027230/665690/667318/RLK;Lus10027239/634273/635683/RLP
All SNPs	245	Lu11-2310694	11	2310694	A	G	G	0.11	0.89	3	67	0.56	1.46	pLARmEB	1	PM_2013	1	1
All SNPs	246	Lu11-3025137	11	3025137	T	G	G	0.38	0.62	3	56.68	0.24	1.39	ISIS EM-BLASSO	1	PM_2012	1	4	Lus10041991/2950827/2951681/RLK;Lus10041992/2951911/2953009/RLK;Lus10042020/3057004/3059686/TNL;Lus10042023/3065596/3070805/TM-CC
All SNPs	247	Lu11-3026536	11	3026536	T	C	C	0.42	0.58	3	38.01	0.23	1.54	FASTmrMLM,pKWmEB,pLARmEB	3	PM_2012	1	4	Lus10041991/2950827/2951681/RLK;Lus10041992/2951911/2953009/RLK;Lus10042020/3057004/3059686/TNL;Lus10042023/3065596/3070805/TM-CC
All SNPs	248	Lu11-4427583	11	4427583	C	G	G	0.28	0.72	6	44.66	0.74	8.39	pLARmEB	1	PM_2015	1	1
All SNPs	249	Lu11-4814792	11	4814792	C	T	T	0.11	0.89	5	42.58	0.78	2.92	pKWmEB	1	PM_2012	1	1	Lus10026208/4900247/4901703/RLP	Lus10026227/4813057/4815805/calmodulin-binding protein-related
All SNPs	250	Lu11-5325415	11	5325415	C	A	A	0.32	0.68	2	196.71	0.11	0.21	FASTmrEMMA	1	PM_2014	1	3	Lus10038174/5231036/5234068/RLK;Lus10038212/5356986/5357735/RLK;Lus10038227/5399813/5400616/RLK
All SNPs	251	Lu11-5688709	11	5688709	A	G	A	0.28	0.28	5	39.37	-0.45	3.26	FASTmrEMMA,FASTmrMLM,ISIS EM-BLASSO,mrMLM,pKWmEB,pLARmEB	6	PM_2014	1	1	Lus10038298/5687006/5687548/DIR
All SNPs	252	Lu11-7032586	11	7032586	G	C	G	0.14	0.14	6	20.49	-0.87	4.95	FASTmrMLM	1	PM_2016	1	4	Lus10036608/7044746/7047325/RLK;Lus10036616/7008888/7010120/TM-CC;Lus10036617/7005870/7008825/TM-CC;Lus10036624/6974408/6975511/WRKY	Lus10036611/7029980/7033782/Reticulon family protein
All SNPs	253	Lu11-15914188	11	15914188	T	C	T	0.39	0.39	6	20.01	-0.28	2.04	FASTmrMLM,mrMLM	2	PM_2016	1	2	Lus10023612/15865060/15871920/TM-CC;Lus10023615/15848418/15850533/WRKY	Lus10023605/15913274/15914547/HVA22 homologue A
All SNPs	254	Lu11-17188390	11	17188390	C	T	C	0.25	0.25	6	27.64	-1.44	27.82	pLARmEB	1	PM_2013	1	3	Lus10039295/17129539/17131415/WRKY;Lus10039304/17096922/17098155/TM-CC;Lus10039305/17096179/17096850/TM-CC	Lus10039284/17188293/17191771/Homeodomain-like superfamily protein
All SNPs	255	Lu11-18699856	11	18699856	G	A	G	0.08	0.08	1	50.55	-0.44	0.65	FASTmrEMMA,GLM	2	PM_2013	1	4	Lus10031228/18693790/18694870/RLK;Lus10031230/18696229/18699398/RLK;Lus10031231/18700928/18703536/RLK;Lus10031254/18796297/18797480/RLP
All SNPs	256	Lu11-18955548	11	18955548	G	T	T	0.43	0.57	2	123.72	0.1	0.32	FASTmrMLM	1	PM_2014	1	1	Lus10031290/19014401/19016992/RLK
All SNPs	257	Lu12-720013	12	720013	A	G	G	0.2	0.8	4	61.75	0.5	2.61	mrMLM	1	PM_2014	1	3	Lus10006746/819557/822893/RLK;Lus10006752/799664/800605/RLK;Lus10006772/719787/720446/RLK	Lus10006772/719787/720446/S-locus lectin protein kinase family protein	Lus10006772/719787/720446/RLK
All SNPs	258	Lu12-1350182	12	1350182	T	A	A	0.35	0.65	1	125.79	0.17	0.64	ISIS EM-BLASSO	1	PM_Mean	1	2	Lus10036242/1319984/1324083/RLK;Lus10036251/1369197/1373122/RLK
All SNPs	259	Lu12-1353163	12	1353163	A	C	C	0.39	0.61	2	224.44	0.05	0.07	pLARmEB	1	PM_Mean	1	2	Lus10036242/1319984/1324083/RLK;Lus10036251/1369197/1373122/RLK
All SNPs	260	Lu12-1884050	12	1884050	T	C	C	0.19	0.81	5	43.36	0.59	3.32	ISIS EM-BLASSO,pKWmEB	2	PM_2013	1	5	Lus10023323/1893862/1897997/RLK;Lus10023329/1873149/1874696/TNL;Lus10023330/1872009/1872841/TNL;Lus10023335/1851546/1852296/RLK;Lus10023339/1833679/1837008/RLK
All SNPs	261	Lu12-2366081	12	2366081	A	G	G	0.28	0.72	6	40.43	0.58	5.33	pLARmEB	1	PM_Mean	1	1	Lus10023220/2345190/2348295/RLK
All SNPs	262	Lu12-2667998	12	2667998	G	A	A	0.11	0.89	2	178.81	0.21	0.23	ISIS EM-BLASSO,mrMLM,pKWmEB	3	PM_2015	1	1	Lus10006964/2735614/2737721/RLK	Lus10006976/2667438/2669994/regulatory particle AAA-ATPase 2A
All SNPs	263	Lu12-3128428	12	3128428	C	T	T	0.07	0.93	3	39	0.84	2.14	ISIS EM-BLASSO,pKWmEB	2	PM_2016	1	1	Lus10015277/3133318/3136716/RLK
All SNPs	264	Lu12-4755639	12	4755639	C	G	G	0.1	0.9	6	38.32	1	4.26	FASTmrMLM,FarmCPU,ISIS EM-BLASSO	3	PM_2013,PM_2014,PM_Mean	3	1
All SNPs	265	Lu12-5085475	12	5085475	T	C	T	0.34	0.34	4	43.78	-0.31	2	FASTmrMLM,FarmCPU	2	PM_Mean	1	1	Lus10018289/5110353/5112941/TM-CC
All SNPs	266	Lu12-5679609	12	5679609	A	G	A	0.26	0.26	6	36.69	-0.68	6.6	pLARmEB	1	PM_2012	1	1
All SNPs	267	Lu12-6604025	12	6604025	T	G	T	0.31	0.31	6	37.79	-0.6	6.62	pLARmEB	1	PM_2012	1	1		Lus10006516/6600748/6604770/homolog of yeast sucrose nonfermenting 4
All SNPs	268	Lu12-16256248	12	16256248	T	C	C	0.44	0.56	5	72.77	0.33	3.39	pKWmEB	1	PM_Mean	1	1		Lus10043110/16252921/16257023/RNI-like superfamily protein
All SNPs	269	Lu12-18491384	12	18491384	A	G	G	0.11	0.89	5	57.46	0.99	4.83	pKWmEB	1	PM_2014	1	1	Lus10034108/18562139/18564322/RLK
All SNPs	270	Lu12-18513438	12	18513438	A	G	A	0.28	0.28	3	68.46	-0.31	1.54	FASTmrEMMA,FASTmrMLM,mrMLM,pLARmEB	4	PM_2015,PM_Mean	2	1	Lus10034108/18562139/18564322/RLK	Lus10034116/18507755/18513588/alpha-N-acetylglucosaminidase family
All SNPs	271	Lu12-18665793	12	18665793	A	G	A	0.29	0.29	5	64.72	-0.49	3.83	pLARmEB	1	PM_2013	1	2	Lus10003071/18723348/18723653/RLK;Lus10003072/18723654/18726224/RLK
All SNPs	272	Lu12-19127670	12	19127670	G	A	A	0.23	0.77	5	93.09	0.34	1.35	pKWmEB	1	PM_2016	1	1	Lus10033608/19122119/19129113/RLK	Lus10033608/19122119/19129113/Mitogen activated protein kinase kinase kinase-related	Lus10033608/19122119/19129113/RLK
All SNPs	273	Lu12-19651913	12	19651913	A	G	G	0.19	0.81	1	194.5	0.07	0.05	ISIS EM-BLASSO	1	PM_Mean	1	6	Lus10031592/19745794/19749828/RLK;Lus10031596/19725356/19727904/RLK;Lus10031601/19708556/19709680/RLP;Lus10031602/19706543/19707946/RLK;Lus10031603/19703176/19705988/RLK;Lus10031605/19698875/19699270/RLK
All SNPs	274	Lu13-331509	13	331509	T	C	C	0.07	0.93	5	40.84	1.14	3.78	FASTmrMLM	1	PM_2014	1	1	Lus10000744/313767/314614/TNL
All SNPs	275	Lu13-348196	13	348196	G	A	A	0.38	0.62	6	30.82	0.44	4.79	FASTmrEMMA	1	PM_Mean	1	1	Lus10000744/313767/314614/TNL
All SNPs	276	Lu13-357119	13	357119	T	C	C	0.34	0.66	6	30.02	0.65	8.88	FASTmrEMMA,GLM,ISIS EM-BLASSO,mrMLM	4	PM_2015,PM_Mean	2	1	Lus10000744/313767/314614/TNL
All SNPs	277	Lu13-633690	13	633690	T	C	T	0.43	0.43	1	96.54	-0.14	0.62	FASTmrMLM,mrMLM,pLARmEB	3	PM_2016	1	1
All SNPs	278	Lu13-2038032	13	2038032	T	C	T	0.27	0.27	2	113.73	-0.2	0.59	FASTmrEMMA,mrMLM	2	PM_Mean	1	4	Lus10026838/1981440/1985178/WRKY;Lus10026845/1944672/1945903/TNL;Lus10026992/2109984/2112573/TM-CC;Lus10026993/2107200/2109308/RLP
All SNPs	279	Lu13-2630454	13	2630454	G	C	G	0.47	0.47	6	43.51	-0.61	13.26	mrMLM,pLARmEB	2	PM_2013	1	1	Lus10026894/2695609/2696436/RLK
All SNPs	280	Lu13-2803036	13	2803036	T	C	C	0.33	0.67	1	46.5	0.2	0.81	FASTmrEMMA	1	PM_2012	1	2	Lus10001034/2873870/2876374/RLP;Lus10001035/2877002/2882692/RLP
All SNPs	281	Lu13-2996936	13	2996936	T	C	T	0.36	0.36	3	58.8	-0.22	1.06	ISIS EM-BLASSO	1	PM_Mean	1	4	Lus10001038/2910946/2911827/TNL;Lus10001039/2911982/2914272/TNL;Lus10001040/2914341/2915277/TNL;Lus10025943/3001560/3004717/RLK
All SNPs	282	Lu13-3523564	13	3523564	C	A	C	0.48	0.48	6	28.53	-0.39	5.79	pLARmEB	1	PM_2014	1	1	Lus10026082/3605340/3606813/WRKY
All SNPs	283	Lu13-3599975	13	3599975	T	G	G	0.12	0.88	2	108.52	0.32	0.54	ISIS EM-BLASSO	1	PM_2013	1	1	Lus10026082/3605340/3606813/WRKY
All SNPs	284	Lu13-4048698	13	4048698	T	G	G	0.14	0.86	6	37.27	1.37	12.66	GLM	1	PM_Mean	1	7	Lus10002736/4064480/4065781/CNL;Lus10002737/4066720/4068303/CNL;Lus10002743/4086952/4089951/RLP;Lus10002753/4136784/4140702/RLP;Lus10002754/4141596/4143026/RLP;Lus10002755/4144251/4147241/RLP;Lus10026169/3997321/3997740/RLK	Lus10002733/4047735/4049731/DNAJ homologue 2
All SNPs	285	Lu13-4136428	13	4136428	A	C	C	0.19	0.81	3	70.89	0.39	1.44	FASTmrEMMA	1	PM_2013	1	8	Lus10002736/4064480/4065781/CNL;Lus10002737/4066720/4068303/CNL;Lus10002743/4086952/4089951/RLP;Lus10002753/4136784/4140702/RLP;Lus10002754/4141596/4143026/RLP;Lus10002755/4144251/4147241/RLP;Lus10002757/4155858/4156274/RLP;Lus10002758/4156861/4159803/RLP
All SNPs	286	Lu13-4432608	13	4432608	T	C	C	0.44	0.56	6	29.66	0.35	3.97	pLARmEB	1	PM_2012	1	2	Lus10019708/4520377/4539065/TNL;Lus10019722/4448610/4451882/RLK	Lus10019725/4430141/4433821/polyamine oxidase 1
All SNPs	287	Lu13-4590208	13	4590208	G	T	T	0.19	0.81	5	49.65	0.57	2.99	pKWmEB	1	PM_2013	1	1	Lus10019708/4520377/4539065/TNL
All SNPs	288	Lu13-4791823	13	4791823	T	C	C	0.14	0.86	6	33.85	1.43	13.79	FASTmrMLM,FarmCPU,GLM,ISIS EM-BLASSO,mrMLM,pKWmEB,pLARmEB	7	PM_2014,PM_2015,PM_2016,PM_Mean	4	3	Lus10000835/4813804/4814638/RPW8;Lus10000836/4816848/4818268/RPW8;Lus10009328/4871884/4875204/RPW8	Lus10000746/4791559/4792034/AP2
All SNPs	289	Lu13-4830850	13	4830850	G	A	A	0.25	0.75	5	50.86	0.73	7.17	FASTmrEMMA	1	PM_2014	1	3	Lus10000835/4813804/4814638/RPW8;Lus10000836/4816848/4818268/RPW8;Lus10009328/4871884/4875204/RPW8	Lus10000837/4820231/4835279/SKU5 similar 16
All SNPs	290	Lu13-4866704	13	4866704	G	A	A	0.43	0.57	6	33.14	0.64	12.24	FASTmrMLM,pLARmEB	2	PM_Mean	1	4	Lus10000835/4813804/4814638/RPW8;Lus10000836/4816848/4818268/RPW8;Lus10009328/4871884/4875204/RPW8;Lus10009339/4940816/4945877/RLK
All SNPs	291	Lu13-4900476	13	4900476	T	G	G	0.14	0.86	6	35.47	1.27	10.9	FASTmrEMMA	1	PM_2012	1	4	Lus10000835/4813804/4814638/RPW8;Lus10000836/4816848/4818268/RPW8;Lus10009328/4871884/4875204/RPW8;Lus10009339/4940816/4945877/RLK
All SNPs	292	Lu13-5102696	13	5102696	T	C	C	0.45	0.55	6	43.04	0.47	7.14	pLARmEB	1	PM_2013	1	1	Lus10009364/5141681/5142476/RLK
All SNPs	293	Lu13-5116313	13	5116313	T	C	C	0.39	0.61	6	42.83	0.57	8.33	FASTmrEMMA,FASTmrMLM	2	PM_2016	1	1	Lus10009364/5141681/5142476/RLK
All SNPs	294	Lu13-5667491	13	5667491	T	C	C	0.28	0.72	4	76.56	0.38	2.29	FASTmrMLM,mrMLM	2	PM_2012	1	2	Lus10011576/5672600/5675656/RLK;Lus10011577/5675880/5676698/RLK
All SNPs	295	Lu13-6229154	13	6229154	C	T	T	0.29	0.71	4	58.59	0.27	1.19	ISIS EM-BLASSO	1	PM_2014	1	3	Lus10006789/6251251/6254906/TNL;Lus10006793/6215024/6217123/CNL;Lus10006794/6213590/6214996/CNL
All SNPs	296	Lu13-14031479	13	14031479	C	A	A	0.12	0.88	6	35.73	1.01	5.45	ISIS EM-BLASSO,pKWmEB	2	PM_2015	1	1
All SNPs	297	Lu13-14413877	13	14413877	T	C	C	0.07	0.93	6	32.56	1.66	8.27	pLARmEB	1	PM_2015	1	1
All SNPs	298	Lu13-14551753	13	14551753	T	G	G	0.23	0.77	6	30.37	0.61	4.48	FASTmrMLM,ISIS EM-BLASSO	2	PM_Mean	1	2	Lus10034697/14567316/14570767/TNL;Lus10034711/14643104/14643559/RLK	Lus10034693/14549067/14553181/Unknown
All SNPs	299	Lu13-14603346	13	14603346	T	A	A	0.21	0.79	4	81.8	0.51	2.75	ISIS EM-BLASSO,pKWmEB	2	PM_2012	1	2	Lus10034697/14567316/14570767/TNL;Lus10034711/14643104/14643559/RLK	Lus10034705/14602052/14604234/soluble N-ethylmaleimide-sensitive factor adaptor protein 33
All SNPs	300	Lu13-16452573	13	16452573	A	G	G	0.08	0.92	5	51.26	0.93	2.87	FASTmrMLM,pKWmEB	2	PM_2012	1	1	Lus10032162/16548757/16551846/RLK
All SNPs	301	Lu13-16685086	13	16685086	T	C	T	0.45	0.45	1	118.78	-0.13	0.57	FASTmrEMMA	1	PM_2013	1	1
All SNPs	302	Lu13-17247218	13	17247218	A	T	T	0.07	0.93	5	11.73	0.86	2.32	FASTmrMLM,pLARmEB	2	PM_2014	1	1	Lus10025578/17222805/17224022/RLP	Lus10025573/17243645/17249252/RNA-binding (RRM
All SNPs	303	Lu13-18313086	13	18313086	T	C	T	0.48	0.48	3	70.19	-0.23	1.9	pKWmEB	1	PM_2013	1	8	Lus10030845/18211794/18215062/RLK;Lus10030846/18218174/18221600/RLK;Lus10030847/18222200/18225706/RLK;Lus10030851/18251116/18254564/RLK;Lus10030852/18256874/18259161/RLK;Lus10030854/18273840/18276900/RLK;Lus10030855/18277829/18280950/RLK;Lus10030856/18281785/18285734/RLK
All SNPs	304	Lu13-19354498	13	19354498	C	T	T	0.16	0.84	4	62.5	0.45	1.51	ISIS EM-BLASSO	1	PM_2013	1	2	Lus10026651/19445767/19447677/RLP;Lus10030424/19358334/19360266/WRKY
All SNPs	305	Lu14-415594	14	415594	A	G	A	0.27	0.27	6	21.8	-0.56	4.72	FASTmrMLM,pLARmEB	2	PM_2016	1	1	Lus10009429/457234/460472/RLK	Lus10009442/413359/416116/O-methyltransferase family protein
All SNPs	306	Lu14-1254821	14	1254821	G	A	G	0.28	0.28	6	44.58	-0.8	9.79	FASTmrMLM,mrMLM	2	PM_2012	1	1	Lus10028639/1171345/1174215/CNL
All SNPs	307	Lu14-2160157	14	2160157	T	A	A	0.11	0.89	1	129.66	0.43	0.9	mrMLM,pKWmEB,pLARmEB	3	PM_Mean	1	3	Lus10025541/2222430/2225632/RLK;Lus10025544/2230403/2232708/RLK;Lus10025545/2235555/2236556/RLK
All SNPs	308	Lu14-2216515	14	2216515	A	G	G	0.08	0.92	6	44.47	1.19	4.87	FASTmrEMMA	1	PM_2014,PM_Mean	2	3	Lus10025541/2222430/2225632/RLK;Lus10025544/2230403/2232708/RLK;Lus10025545/2235555/2236556/RLK
All SNPs	309	Lu14-2220099	14	2220099	T	C	C	0.07	0.93	6	30.66	1.52	6.89	GLM,ISIS EM-BLASSO	2	PM_Mean	1	3	Lus10025541/2222430/2225632/RLK;Lus10025544/2230403/2232708/RLK;Lus10025545/2235555/2236556/RLK
All SNPs	310	Lu14-2650923	14	2650923	C	T	T	0.25	0.75	6	39.85	0.72	6.85	pKWmEB	1	PM_2013	1	1	Lus10013342/2629331/2632518/RLK
All SNPs	311	Lu14-3401075	14	3401075	C	T	T	0.22	0.78	1	77.27	0.19	0.43	FASTmrMLM	1	PM_2013	1	3	Lus10020534/3457175/3462957/TNL;Lus10020546/3375494/3376985/RLK;Lus10020550/3341499/3348692/RLK	Lus10020543/3400517/3402048/histone deacetylase 2B
All SNPs	312	Lu14-3433849	14	3433849	A	T	T	0.13	0.87	6	37.55	1.02	5.97	ISIS EM-BLASSO	1	PM_2014	1	4	Lus10020525/3504202/3505209/TNL;Lus10020534/3457175/3462957/TNL;Lus10020546/3375494/3376985/RLK;Lus10020550/3341499/3348692/RLK	Lus10020538/3432316/3433950/Protein of unknown function (DUF295)
All SNPs	313	Lu14-3511703	14	3511703	C	A	C	0.27	0.27	4	77.66	-0.44	2.89	FASTmrMLM	1	PM_2014	1	2	Lus10020525/3504202/3505209/TNL;Lus10020534/3457175/3462957/TNL	Lus10020524/3509735/3513339/transmembrane receptors;ATP binding
All SNPs	314	Lu14-3549845	14	3549845	A	T	A	0.4	0.4	6	18.31	-0.61	9.76	pLARmEB	1	PM_2015	1	2	Lus10020525/3504202/3505209/TNL;Lus10020534/3457175/3462957/TNL
All SNPs	315	Lu14-3600594	14	3600594	T	C	T	0.16	0.16	1	65.89	-0.35	0.94	FASTmrMLM	1	PM_Mean	1	1	Lus10020525/3504202/3505209/TNL	Lus10021388/3594233/3602908/HXXXD-type acyl-transferase family protein
All SNPs	316	Lu14-3632276	14	3632276	A	C	A	0.38	0.38	6	36.35	-0.54	6.95	ISIS EM-BLASSO	1	PM_2015	1	1
All SNPs	317	Lu14-4798201	14	4798201	A	C	C	0.31	0.69	1	143.38	0.11	0.22	pKWmEB	1	PM_Mean	1	1	Lus10012508/4807215/4810409/RLK	Lus10012510/4795861/4801594/tetratricopeptide repeat (TPR)-containing protein
All SNPs	318	Lu14-4976146	14	4976146	C	T	C	0.5	0.5	1	105.81	-0.11	0.47	mrMLM	1	PM_2014	1	3	Lus10014207/5061029/5065135/TNL;Lus10014235/4957874/4960241/RLK;Lus10014236/4954671/4957103/RLK	Lus10014230/4975233/4978786/S-adenosyl-L-methionine-dependent methyltransferases superfamily protein
All SNPs	319	Lu14-5213933	14	5213933	A	G	G	0.31	0.69	5	86.49	0.29	1.49	pKWmEB	1	PM_2016	1	3	Lus10014174/5183018/5185961/RLK;Lus10014177/5170010/5171567/WRKY;Lus10014185/5145249/5147954/RLK
All SNPs	320	Lu14-5243599	14	5243599	A	G	G	0.29	0.71	3	91.9	0.28	1.3	pLARmEB	1	PM_Mean	1	3	Lus10014174/5183018/5185961/RLK;Lus10014177/5170010/5171567/WRKY;Lus10014185/5145249/5147954/RLK
All SNPs	321	Lu14-5476624	14	5476624	G	A	A	0.23	0.77	1	115.83	0.23	0.65	FASTmrMLM	1	PM_2012	1	2	Lus10006848/5496899/5497839/WRKY;Lus10014150/5375403/5382647/RLK	Lus10006844/5476026/5479364/nuclear poly(a) polymerase
All SNPs	322	Lu14-5960489	14	5960489	G	A	A	0.26	0.74	5	56.87	0.47	3.08	pKWmEB	1	PM_2012	1	3	Lus10015648/5955689/5959658/TNL;Lus10015649/5960004/5963280/TNL;Lus10015650/5963346/5966177/TNL	Lus10015649/5960004/5963280/disease resistance protein (TIR-NBS-LRR class)	Lus10015649/5960004/5963280/TNL
All SNPs	323	Lu14-13224994	14	13224994	C	T	C	0.48	0.52	6	34.58	-0.38	6.31	FASTmrMLM	1	PM_2015	1	1	Lus10032887/13232982/13235646/WRKY
All SNPs	324	Lu14-13226830	14	13226830	A	C	A	0.45	0.55	6	36.2	-0.35	6.22	FASTmrEMMA,ISIS EM-BLASSO,pKWmEB,pLARmEB	4	PM_2015	1	1	Lus10032887/13232982/13235646/WRKY
All SNPs	325	Lu14-15588631	14	15588631	A	G	G	0.19	0.81	4	36.7	0.45	1.93	ISIS EM-BLASSO	1	PM_2012	1	1	Lus10003244/15659036/15664924/RLK
All SNPs	326	Lu14-16548135	14	16548135	T	C	C	0.34	0.66	2	381.07	0.02	0.01	pKWmEB	1	PM_2016	1	4	Lus10018021/16558322/16562253/TNL;Lus10018023/16554809/16555030/TNL;Lus10018024/16552178/16554133/TNL;Lus10018027/16539146/16544259/TM-CC
All SNPs	327	Lu14-16744523	14	16744523	A	G	G	0.21	0.79	5	61.1	0.68	4.79	FASTmrEMMA,ISIS EM-BLASSO	2	PM_Mean	1	2	Lus10017963/16826426/16828276/RLK;Lus10017996/16656320/16658772/RLK
All SNPs	328	Lu14-16887287	14	16887287	A	G	A	0.07	0.07	1	211.54	-0.29	0.24	pLARmEB	1	PM_2014	1	2	Lus10017953/16863716/16866294/RLK;Lus10017963/16826426/16828276/RLK
All SNPs	329	Lu14-17320441	14	17320441	C	T	T	0.19	0.81	1	367.11	0.04	0.02	FASTmrEMMA,ISIS EM-BLASSO,pKWmEB	3	PM_2014	1	1
All SNPs	330	Lu14-18839873	14	18839873	A	G	G	0.39	0.61	3	79.9	0.19	0.93	FASTmrMLM,pLARmEB	2	PM_2015	1	2	Lus10014996/18803623/18807690/RLK;Lus10015007/18754596/18758418/TM-CC
All SNPs	331	Lu15-2178	15	2178	G	T	G	0.32	0.32	6	54.02	-0.42	3.4	ISIS EM-BLASSO,mrMLM	2	PM_2015	1	6	Lus10007601/11369/14331/RLK;Lus10007604/29008/31923/RLK;Lus10007608/43694/46128/RLK;Lus10007609/46613/47143/RLK;Lus10007610/47907/50779/RLK;Lus10007611/51620/55118/RLK
All SNPs	332	Lu15-46304	15	46304	C	A	C	0.49	0.49	6	42.89	-0.55	11.6	FASTmrEMMA,FASTmrMLM,ISIS EM-BLASSO,mrMLM,pKWmEB	5	PM_2013	1	9	Lus10007601/11369/14331/RLK;Lus10007604/29008/31923/RLK;Lus10007608/43694/46128/RLK;Lus10007609/46613/47143/RLK;Lus10007610/47907/50779/RLK;Lus10007611/51620/55118/RLK;Lus10007631/134861/137811/RLK;Lus10007632/138808/141347/RLK;Lus10007633/144985/147520/RLK
All SNPs	333	Lu15-210803	15	210803	T	C	T	0.32	0.32	6	49.58	-0.7	9.28	FASTmrMLM,ISIS EM-BLASSO,mrMLM,pLARmEB	4	PM_2015	1	5	Lus10007631/134861/137811/RLK;Lus10007632/138808/141347/RLK;Lus10007633/144985/147520/RLK;Lus10007634/148939/151622/RLK;Lus10007635/152797/159648/RLK
All SNPs	334	Lu15-495161	15	495161	T	G	G	0.18	0.82	4	38.04	0.46	1.92	FASTmrMLM,mrMLM,pLARmEB	3	PM_2016	1	1
All SNPs	335	Lu15-515011	15	515011	C	T	T	0.2	0.8	5	39.08	0.47	2.27	pLARmEB	1	PM_2015	1	1
All SNPs	336	Lu15-1743269	15	1743269	G	T	G	0.21	0.21	2	57.24	-0.35	1.3	FASTmrMLM,pLARmEB	2	PM_2014	1	1	Lus10013910/1752890/1755753/RLK	Lus10013915/1741499/1744162/ACD1-like
All SNPs	337	Lu15-1750689	15	1750689	A	T	A	0.26	0.26	5	27.27	-0.33	1.55	mrMLM	1	PM_2013	1	1	Lus10013910/1752890/1755753/RLK
All SNPs	338	Lu15-2267652	15	2267652	G	C	G	0.33	0.33	6	44.83	-0.77	11.81	pLARmEB	1	PM_2013	1	2	Lus10029306/2287700/2288290/DIR;Lus10029312/2328170/2328667/DIR
All SNPs	339	Lu15-2388308	15	2388308	A	C	A	0.38	0.38	6	22.43	-0.41	4.08	pKWmEB	1	PM_2016	1	1	Lus10029312/2328170/2328667/DIR	Lus10029324/2387548/2390745/calmodulin-binding family protein
All SNPs	340	Lu15-2577730	15	2577730	C	A	C	0.5	0.5	4	41.14	-0.22	1.89	ISIS EM-BLASSO	1	PM_2013	1	1		Lus10029368/2577466/2578269/NAD(P)-binding Rossmann-fold superfamily protein
All SNPs	341	Lu15-2841498	15	2841498	G	A	G	0.17	0.17	6	50.37	-0.74	4.58	ISIS EM-BLASSO,pKWmEB	2	PM_2014	1	1
All SNPs	342	Lu15-3575459	15	3575459	C	T	T	0.47	0.53	2	230.03	0.09	0.32	ISIS EM-BLASSO	1	PM_2014	1	1
All SNPs	343	Lu15-3911640	15	3911640	T	C	C	0.38	0.62	6	61.99	0.54	7.09	FASTmrEMMA,FASTmrMLM,ISIS EM-BLASSO,mrMLM,pKWmEB,pLARmEB	6	PM_2012	1	2	Lus10012678/3990588/4001681/WRKY;Lus10012698/3866177/3870320/MLO
All SNPs	345	Lu15-7063700	15	7063700	A	G	G	0.13	0.87	6	41.73	1.04	6.46	FASTmrMLM	1	PM_2013	1	1	Lus10001489/6987299/6990719/RLK	Lus10001477/7061429/7064119/Remorin family protein
All SNPs	346	Lu15-7064467	15	7064467	T	C	T	0.17	0.17	1	257.06	-0.23	0.44	pKWmEB	1	PM_2012	1	1	Lus10001489/6987299/6990719/RLK
All SNPs	347	Lu15-9561257	15	9561257	T	C	C	0.39	0.61	5	39.08	0.41	4.4	FASTmrEMMA,FASTmrMLM,pLARmEB	3	PM_2014,PM_Mean	2	1	Lus10041180/9652963/9658293/RLK	Lus10041153/9560578/9561312/3-hydroxyacyl-CoA dehydratase 1
All SNPs	348	Lu15-10007503	15	10007503	T	G	G	0.08	0.92	3	118.14	0.52	0.91	GLM,pKWmEB	2	PM_2013	1	2	Lus10041243/9929463/9932255/CNL;Lus10041266/10053796/10055048/RLP
All SNPs	349	Lu15-13210936	15	13210936	G	A	G	0.47	0.47	6	30.69	-0.53	10.02	pKWmEB	1	PM_2016	1	1		Lus10010024/13209088/13213426/cellulose synthase-like D5
All SNPs	350	Lu15-13552352	15	13552352	A	G	G	0.32	0.68	4	69.54	0.35	2.29	FASTmrEMMA	1	PM_2014	1	2	Lus10009969/13510053/13511304/WRKY;Lus10038017/13607216/13610043/TM-CC
All SNPs	351	Lu15-13858487	15	13858487	A	C	A	0.06	0.06	1	232.52	-0.27	0.18	pKWmEB	1	PM_Mean	1	3	Lus10037947/13937325/13940541/TM-CC;Lus10037954/13907069/13908039/RLK;Lus10037955/13904865/13906814/RLK	Lus10037965/13854484/13862057/armadillo repeat kinesin 2
All SNPs	352	Lu15-14502675	15	14502675	G	T	G	0.1	0.1	1	461.94	-0.1	0.05	pLARmEB	1	PM_2014	1	2	Lus10014829/14581443/14587086/TNL;Lus10037840/14432061/14436021/RLK
