# Supplementary material for: Insights into the Genetic Architecture and Genomic Prediction of Powdery Mildew Resistance in Flax (Linum usitatissimum L.)
Source: Int J Mol Sci. 2022 Apr 29;23(9):4960. doi: 10.3390/ijms23094960 (PMC9104541; doi:10.3390/ijms23094960)
Supplement: Supplementary file 1 [file ijms-23-04960-s001.zip › TableS8.xlsx]

## Sheet: Candidate genes
Table S8. Candidate genes of 269 quantitative trait nucleotides (QTNs) associated with flax powdery mildew resistance
QTN id	Chr	tagQTN pos	Block start	Block end	QTN R2	Gene id	Gene start	Gene end	Gene_family	tagSNP id	tagSNP pos	TagSNP R2	Gene with sig SNP/QTN	Distance between QTN and gene	QTN in gene	QTN with sig SNP	Min distance	QTN id	Gene_gamily	Gene with sig SNP/QTN	Gene cluster
Lu1-229016	1	229016	229755	230220	0.67	Lus10036139	229755	230220	RLK				Lus10036139	739	N	N		Lu1-229016	RLK	Lus10036139
Lu1-229016	1	229016	241089	242719	0.67	Lus10036136	241089	242719	RLK	Lu1-242564	242564	3.65	Lus10036136*	12073	N	Y	1	Lu1-229016	RLK	Lus10036136*
Lu1-229016	1	229016	137341	149486	0.67	Lus10036153	137341	149486	TM-CC	Lu1-146864	146864	1.38	Lus10036153*	79530	N	Y		Lu1-229016	TM-CC	Lus10036153*
Lu1-302574	1	302574	229755	230220	0.11	Lus10036139	229755	230220	RLK				Lus10036139	72354	N	N		Lu1-302574	RLK	Lus10036139
Lu1-302574	1	302574	357121	360754	0.11	Lus10036121	357121	360754	MLO	Lu1-360482	360482	1.01	Lus10036121*	54547	N	Y	1	Lu1-302574	MLO	Lus10036121*
Lu1-302574	1	302574	362286	366213	0.11	Lus10036120	362286	366213	MLO	Lu1-365431	365431	1.27	Lus10036120*	59712	N	Y		Lu1-302574	MLO	Lus10036120*
Lu1-302574	1	302574	241089	242719	0.11	Lus10036136	241089	242719	RLK	Lu1-242564	242564	3.65	Lus10036136*	59855	N	Y		Lu1-302574	RLK	Lus10036136*
Lu1-1809425	1	1809425	1841922	1845721	4.75	Lus10025849	1841922	1845721	RLK	Lu1-1845411	1845411	6.11	Lus10025849*	32497	N	Y	1	Lu1-1809425	RLK	Lus10025849*
Lu1-1809425	1	1809425	1728943	1735992	4.75	Lus10025824	1728943	1735992	TM-CC	Lu1-1735137	1735137	16.26	Lus10025824*	73433	N	Y		Lu1-1809425	TM-CC	Lus10025824*
Lu1-1888391	1	1888391	1841922	1845721	2.07	Lus10025849	1841922	1845721	RLK	Lu1-1845411	1845411	6.11	Lus10025849*	42670	N	Y	1	Lu1-1888391	RLK	Lus10025849*
Lu1-1888391	1	1888391	1966159	1966953	2.07	Lus10025875	1966159	1966953	RLK	Lu1-1966369	1966369	2.69	Lus10025875*	77768	N	Y		Lu1-1888391	RLK	Lus10025875*
Lu1-2878991	1	2878991	2871770	2873117	7.47	Lus10042458	2871770	2873117	RLP	Lu1-2872277	2872277	4.79	Lus10042458*	5874	N	Y	1	Lu1-2878991	RLP	Lus10042458*
Lu1-2878991	1	2878991	2838377	2839771	7.47	Lus10042465	2838377	2839771	TNL	Lu1-2839429	2839429	8.54	Lus10042465*	39220	N	Y		Lu1-2878991	TNL	Lus10042465*
Lu1-3076062	1	3076062	3132145	3134488	2.92	Lus10042397	3132145	3134488	MLO				Lus10042397	56083	N	N	1	Lu1-3076062	MLO	Lus10042397
Lu1-4821620	1	4821620	4756223	4756906	2.21	Lus10027834	4756223	4756906	DIR	Lu1-4756766	4756766	2.78	Lus10027834*	64714	N	Y	1	Lu1-4821620	DIR	Lus10027834*
Lu1-6638662	1	6638662	6599897	6600799	0.41	Lus10034242	6599897	6600799	RLK				Lus10034242	37863	N	N		Lu1-6638662	RLK	Lus10034242
Lu1-6638662	1	6638662	6590687	6594268	0.41	Lus10034245	6590687	6594268	WRKY				Lus10034245	44394	N	N		Lu1-6638662	WRKY	Lus10034245
Lu1-6638662	1	6638662	6586729	6587413	0.41	Lus10034246	6586729	6587413	RLK				Lus10034246	51249	N	N		Lu1-6638662	RLK	Lus10034246
Lu1-6638662	1	6638662	6709334	6709681	0.41	Lus10034217	6709334	6709681	RLK				Lus10034217	70672	N	N		Lu1-6638662	RLK	Lus10034217
Lu1-6638662	1	6638662	6548559	6550209	0.41	Lus10034257	6548559	6550209	RLK				Lus10034257	88453	N	N		Lu1-6638662	RLK	Lus10034257
Lu1-6638662	1	6638662	6595129	6596522	0.41	Lus10034244	6595129	6596522	WRKY	Lu1-6595261	6595261	4.04	Lus10034244*	42140	N	Y	1	Lu1-6638662	WRKY	Lus10034244*
Lu1-6638662	1	6638662	6547628	6548218	0.41	Lus10034258	6547628	6548218	RLK	Lu1-6547923	6547923	6.81	Lus10034258*	90444	N	Y		Lu1-6638662	RLK	Lus10034258*
Lu1-6751125	1	6751125	6709334	6709681	5.72	Lus10034217	6709334	6709681	RLK				Lus10034217	41444	N	N		Lu1-6751125	RLK	Lus10034217
Lu1-6751125	1	6751125	6838254	6842414	5.72	Lus10029075	6838254	6842414	RLK	Lu1-6839573	6839573	1.34	Lus10029075*	87129	N	Y	1	Lu1-6751125	RLK	Lus10029075*
Lu1-9931894	1	9931894	9920158	9921484	2.59	Lus10022736	9920158	9921484	WRKY				Lus10022736	10410	N	N		Lu1-9931894	WRKY	Lus10022736
Lu1-9931894	1	9931894	9904469	9907409	2.59	Lus10022738	9904469	9907409	RLK				Lus10022738	24485	N	N		Lu1-9931894	RLK	Lus10022738
Lu1-9931894	1	9931894	9947629	9950374	2.59	Lus10022728	9947629	9950374	RLK	Lu1-9948943	9948943	1.88	Lus10022728*	15735	N	Y	1	Lu1-9931894	RLK	Lus10022728*
Lu1-16481152	1	16481152	16459072	16459731	0.32	Lus10027040	16459072	16459731	RLP	Lu1-16459114	16459114	6.74	Lus10027040*	21421	N	Y	1	Lu1-16481152	RLP	Lus10027040*
Lu1-18139539	1	18139539	18125241	18127926	1.81	Lus10009703	18125241	18127926	RLK				Lus10009703	11613	N	N	1	Lu1-18139539	RLK	Lus10009703
Lu1-20253410	1	20253410	20188774	20191973	0.04	Lus10020935	20188774	20191973	RLK				Lus10020935	61437	N	N	1	Lu1-20253410	RLK	Lus10020935
Lu1-20253410	1	20253410	20199563	20202012	0.04	Lus10020936	20199563	20202012	RLK				Lus10020936	51398	N	N		Lu1-20253410	RLK	Lus10020936
Lu1-25225402	1	25225402	25231874	25232281	6.25	Lus10028019	25231874	25232281	RLK	Lu1-25231913	25231913	6.42	Lus10028019*	6472	N	Y	1	Lu1-25225402	RLK	Lus10028019*
Lu1-25225402	1	25225402	25197319	25197735	6.25	Lus10028026	25197319	25197735	RLK	Lu1-25197468	25197468	0.43	Lus10028026*	27667	N	Y		Lu1-25225402	RLK	Lus10028026*
Lu1-25261905	1	25261905	25231874	25232281	6.63	Lus10028019	25231874	25232281	RLK	Lu1-25231913	25231913	6.42	Lus10028019*	29624	N	Y	1	Lu1-25261905	RLK	Lus10028019*
Lu1-25261905	1	25261905	25197319	25197735	6.63	Lus10028026	25197319	25197735	RLK	Lu1-25197468	25197468	0.43	Lus10028026*	64170	N	Y		Lu1-25261905	RLK	Lus10028026*
Lu1-26466257	1	26466257	26487140	26490037	1.79	Lus10014712	26487140	26490037	CNL	Lu1-26487837	26487837	11.69	Lus10014712*	20883	N	Y	1	Lu1-26466257	CNL	Lus10014712*
Lu1-26466257	1	26466257	26538142	26539029	1.79	Lus10014723	26538142	26539029	RLK	Lu1-26538572	26538572	0.8	Lus10014723*	71885	N	Y		Lu1-26466257	RLK	Lus10014723*
Lu1-27439547	1	27439547	27524258	27527626	0.14	Lus10010087	27524258	27527626	RLK				Lus10010087	84711	N	N		Lu1-27439547	RLK	Lus10010087
Lu1-27439547	1	27439547	27513205	27516324	0.14	Lus10010085	27513205	27516324	TM-CC	Lu1-27513492	27513492	1.57	Lus10010085*	73658	N	Y	1	Lu1-27439547	TM-CC	Lus10010085*
Lu1-27499441	1	27499441	27524258	27527626	4.69	Lus10010087	27524258	27527626	RLK				Lus10010087	24817	N	N		Lu1-27499441	RLK	Lus10010087
Lu1-27499441	1	27499441	27513205	27516324	4.69	Lus10010085	27513205	27516324	TM-CC	Lu1-27513492	27513492	1.57	Lus10010085*	13764	N	Y	1	Lu1-27499441	TM-CC	Lus10010085*
Lu1-27733521	1	27733521	27823004	27824842	0.44	Lus10018815	27823004	27824842	WRKY				Lus10018815	89483	N	N		Lu1-27733521	WRKY	Lus10018815
Lu1-27733521	1	27733521	27654934	27655257	0.44	Lus10010115	27654934	27655257	RLK	Lu1-27655097	27655097	2.89	Lus10010115*	78264	N	Y	1	Lu1-27733521	RLK	Lus10010115*
Lu1-28683876	1	28683876	28686182	28689003	4.44	Lus10006057	28686182	28689003	RLK				Lus10006057	2306	N	N		Lu1-28683876	RLK	Lus10006057
Lu1-28683876	1	28683876	28681727	28684082	4.44	Lus10006056	28681727	28684082	RLK	Lu1-28683876	28683876	4.44	Lus10006056**	0	Y	Y	1	Lu1-28683876	RLK	Lus10006056**
Lu1-28683876	1	28683876	28745009	28748864	4.44	Lus10006067	28745009	28748864	RLK	Lu1-28747065	28747065	4.92	Lus10006067*	61133	N	Y		Lu1-28683876	RLK	Lus10006067*
Lu1-28738634	1	28738634	28686182	28689003	0.55	Lus10006057	28686182	28689003	RLK				Lus10006057	49631	N	N		Lu1-28738634	RLK	Lus10006057
Lu1-28738634	1	28738634	28745009	28748864	0.55	Lus10006067	28745009	28748864	RLK	Lu1-28747065	28747065	4.92	Lus10006067*	6375	N	Y	1	Lu1-28738634	RLK	Lus10006067*
Lu1-28738634	1	28738634	28681727	28684082	0.55	Lus10006056	28681727	28684082	RLK	Lu1-28683876	28683876	4.44	Lus10006056*	54552	N	Y		Lu1-28738634	RLK	Lus10006056*
Lu2-805034	2	805034	722575	726044	0.86	Lus10019248	722575	726044	RLK	Lu2-723144	723144	5.23	Lus10019248*	78990	N	Y	1	Lu2-805034	RLK	Lus10019248*
Lu2-1672205	2	1672205	1583715	1588562	30.2	Lus10019654	1583715	1588562	TNL	Lu2-1584853	1584853	2.01	Lus10019654*	83643	N	Y	1	Lu2-1672205	TNL	Lus10019654*
Lu2-1678019	2	1678019	1583715	1588562	1.88	Lus10019654	1583715	1588562	TNL	Lu2-1584853	1584853	2.01	Lus10019654*	89457	N	Y	1	Lu2-1678019	TNL	Lus10019654*
Lu2-2254607	2	2254607	2316548	2319583	9.78	Lus10016340	2316548	2319583	RLP				Lus10016340	61941	N	N		Lu2-2254607	RLP	Lus10016340
Lu2-2254607	2	2254607	2320228	2323230	9.78	Lus10016339	2320228	2323230	RLP				Lus10016339	65621	N	N		Lu2-2254607	RLP	Lus10016339
Lu2-2254607	2	2254607	2324392	2326916	9.78	Lus10016338	2324392	2326916	RLP				Lus10016338	69785	N	N		Lu2-2254607	RLP	Lus10016338
Lu2-2254607	2	2254607	2296482	2299289	9.78	Lus10016344	2296482	2299289	RLP	Lu2-2298633	2298633	5.87	Lus10016344*	41875	N	Y	1	Lu2-2254607	RLP	Lus10016344*
Lu2-2254607	2	2254607	2307887	2310784	9.78	Lus10016342	2307887	2310784	RLP	Lu2-2308787	2308787	8.17	Lus10016342*	53280	N	Y		Lu2-2254607	RLP	Lus10016342*
Lu2-2254607	2	2254607	2311709	2314696	9.78	Lus10016341	2311709	2314696	RLP	Lu2-2312659	2312659	0.69	Lus10016341*	57102	N	Y		Lu2-2254607	RLP	Lus10016341*
Lu2-2254607	2	2254607	2328690	2332210	9.78	Lus10016337	2328690	2332210	RLP	Lu2-2331717	2331717	6.15	Lus10016337*	74083	N	Y		Lu2-2254607	RLP	Lus10016337*
Lu2-4181088	2	4181088	4164564	4170673	8.17	Lus10020168	4164564	4170673	TM-CC	Lu2-4164574	4164574	7.48	Lus10020168*	10415	N	Y	1	Lu2-4181088	TM-CC	Lus10020168*
Lu2-4181088	2	4181088	4257022	4259288	8.17	Lus10020183	4257022	4259288	RLK	Lu2-4257591	4257591	1.62	Lus10020183*	75934	N	Y		Lu2-4181088	RLK	Lus10020183*
Lu2-4369359	2	4369359	4421980	4423988	2.52	Lus10020215	4421980	4423988	WRKY				Lus10020215	52621	N	N		Lu2-4369359	WRKY	Lus10020215
Lu2-4369359	2	4369359	4289398	4291506	2.52	Lus10020189	4289398	4291506	RLP	Lu2-4290493	4290493	6.25	Lus10020189*	77853	N	Y	1	Lu2-4369359	RLP	Lus10020189*
Lu2-4369359	2	4369359	4283474	4286653	2.52	Lus10020188	4283474	4286653	TM-CC	Lu2-4286402	4286402	4.2	Lus10020188*	82706	N	Y		Lu2-4369359	TM-CC	Lus10020188*
Lu2-4370145	2	4370145	4421980	4423988	0.94	Lus10020215	4421980	4423988	WRKY				Lus10020215	51835	N	N		Lu2-4370145	WRKY	Lus10020215
Lu2-4370145	2	4370145	4289398	4291506	0.94	Lus10020189	4289398	4291506	RLP	Lu2-4290493	4290493	6.25	Lus10020189*	78639	N	Y	1	Lu2-4370145	RLP	Lus10020189*
Lu2-4370145	2	4370145	4283474	4286653	0.94	Lus10020188	4283474	4286653	TM-CC	Lu2-4286402	4286402	4.2	Lus10020188*	83492	N	Y		Lu2-4370145	TM-CC	Lus10020188*
Lu2-5393946	2	5393946	5348911	5352631	3.48	Lus10038107	5348911	5352631	RLP				Lus10038107	41315	N	N	1	Lu2-5393946	RLP	Lus10038107
Lu2-17212927	2	17212927	17269174	17270105	3.06	Lus10007171	17269174	17270105	RLK	Lu2-17270047	17270047	0.16	Lus10007171*	56247	N	Y	1	Lu2-17212927	RLK	Lus10007171*
Lu2-20843266	2	20843266	20754888	20758057	1.28	Lus10021635	20754888	20758057	RLP	Lu2-20755651	20755651	5.46	Lus10021635*	85209	N	Y	1	Lu2-20843266	RLP	Lus10021635*
Lu2-22680688	2	22680688	22683146	22686348	1.45	Lus10014500	22683146	22686348	RLK	Lu2-22686060	22686060	8.5	Lus10014500*	2458	N	Y	1	Lu2-22680688	RLK	Lus10014500*
Lu2-23184917	2	23184917	23175653	23177507	6.31	Lus10013247	23175653	23177507	RLK	Lu2-23176480	23176480	3.32	Lus10013247*	7410	N	Y	1	Lu2-23184917	RLK	Lus10013247*
Lu2-23184917	2	23184917	23172063	23175081	6.31	Lus10013246	23172063	23175081	RLK	Lu2-23174256	23174256	2.71	Lus10013246*	9836	N	Y		Lu2-23184917	RLK	Lus10013246*
Lu2-23184917	2	23184917	23157915	23160932	6.31	Lus10013244	23157915	23160932	RLK	Lu2-23157954	23157954	4.44	Lus10013244*	23985	N	Y		Lu2-23184917	RLK	Lus10013244*
Lu2-23184917	2	23184917	23233618	23234049	6.31	Lus10013257	23233618	23234049	RLK	Lu2-23233825	23233825	0.54	Lus10013257*	48701	N	Y		Lu2-23184917	RLK	Lus10013257*
Lu2-23184917	2	23184917	23254936	23257353	6.31	Lus10013262	23254936	23257353	RLK	Lu2-23256771	23256771	2.42	Lus10013262*	70019	N	Y		Lu2-23184917	RLK	Lus10013262*
Lu2-23259700	2	23259700	23254936	23257353	3.47	Lus10013262	23254936	23257353	RLK	Lu2-23256771	23256771	2.42	Lus10013262*	2347	N	Y	1	Lu2-23259700	RLK	Lus10013262*
Lu2-23259700	2	23259700	23233618	23234049	3.47	Lus10013257	23233618	23234049	RLK	Lu2-23233825	23233825	0.54	Lus10013257*	25651	N	Y		Lu2-23259700	RLK	Lus10013257*
Lu2-23259700	2	23259700	23175653	23177507	3.47	Lus10013247	23175653	23177507	RLK	Lu2-23176480	23176480	3.32	Lus10013247*	82193	N	Y		Lu2-23259700	RLK	Lus10013247*
Lu2-23259700	2	23259700	23172063	23175081	3.47	Lus10013246	23172063	23175081	RLK	Lu2-23174256	23174256	2.71	Lus10013246*	84619	N	Y		Lu2-23259700	RLK	Lus10013246*
Lu2-23259700	2	23259700	23157915	23160932	3.47	Lus10013244	23157915	23160932	RLK	Lu2-23157954	23157954	4.44	Lus10013244*	98768	N	Y		Lu2-23259700	RLK	Lus10013244*
Lu2-23956326	2	23956326	23945145	23948006	3.53	Lus10030589	23945145	23948006	RLK				Lus10030589	8320	N	N		Lu2-23956326	RLK	Lus10030589
Lu2-23956326	2	23956326	23955411	23958647	3.53	Lus10030587	23955411	23958647	RLK	Lu2-23955566	23955566	5.68	Lus10030587**	0	Y	Y	1	Lu2-23956326	RLK	Lus10030587**
Lu2-24250509	2	24250509	24261497	24264627	0.22	Lus10012877	24261497	24264627	RLK	Lu2-24264118	24264118	2.37	Lus10012877*	10988	N	Y	1	Lu2-24250509	RLK	Lus10012877*
Lu2-24250509	2	24250509	24294640	24295903	0.22	Lus10012870	24294640	24295903	WRKY	Lu2-24295698	24295698	2.01	Lus10012870*	44131	N	Y		Lu2-24250509	WRKY	Lus10012870*
Lu2-25211413	2	25211413	25259433	25261671	7.17	Lus10006445	25259433	25261671	RLK				Lus10006445	48020	N	N	1	Lu2-25211413	RLK	Lus10006445
Lu3-1644588	3	1644588	1613460	1614125	11.92	Lus10037339	1613460	1614125	RLK				Lus10037339	30463	N	N		Lu3-1644588	RLK	Lus10037339
Lu3-1644588	3	1644588	1738506	1742264	11.92	Lus10037311	1738506	1742264	RLK	Lu3-1739395	1739395	5.14	Lus10037311*	93918	N	Y	1	Lu3-1644588	RLK	Lus10037311*
Lu3-1644588	3	1644588	1744034	1747357	11.92	Lus10037310	1744034	1747357	RLK	Lu3-1744604	1744604	4.65	Lus10037310*	99446	N	Y		Lu3-1644588	RLK	Lus10037310*
Lu3-1712987	3	1712987	1613460	1614125	4.48	Lus10037339	1613460	1614125	RLK				Lus10037339	98862	N	N		Lu3-1712987	RLK	Lus10037339
Lu3-1712987	3	1712987	1738506	1742264	4.48	Lus10037311	1738506	1742264	RLK	Lu3-1739395	1739395	5.14	Lus10037311*	25519	N	Y	1	Lu3-1712987	RLK	Lus10037311*
Lu3-1712987	3	1712987	1744034	1747357	4.48	Lus10037310	1744034	1747357	RLK	Lu3-1744604	1744604	4.65	Lus10037310*	31047	N	Y		Lu3-1712987	RLK	Lus10037310*
Lu3-1743768	3	1743768	1744034	1747357	0.67	Lus10037310	1744034	1747357	RLK	Lu3-1744604	1744604	4.65	Lus10037310*	266	N	Y	1	Lu3-1743768	RLK	Lus10037310*
Lu3-1743768	3	1743768	1738506	1742264	0.67	Lus10037311	1738506	1742264	RLK	Lu3-1739395	1739395	5.14	Lus10037311*	1504	N	Y		Lu3-1743768	RLK	Lus10037311*
Lu3-1743768	3	1743768	1815017	1816267	0.67	Lus10037297	1815017	1816267	RLK	Lu3-1816232	1816232	1.04	Lus10037297*	71249	N	Y		Lu3-1743768	RLK	Lus10037297*
Lu3-1917196	3	1917196	1897891	1900982	3.33	Lus10037276	1897891	1900982	RLK	Lu3-1898475	1898475	2.13	Lus10037276*	16214	N	Y	1	Lu3-1917196	RLK	Lus10037276*
Lu3-4288634	3	4288634	4369569	4371800	0.05	Lus10019113	4369569	4371800	RLK	Lu3-4371542	4371542	0.87	Lus10019113*	80935	N	Y	1	Lu3-4288634	RLK	Lus10019113*
Lu3-4288634	3	4288634	4381523	4388318	0.05	Lus10019114	4381523	4388318	RLK	Lu3-4383881	4383881	7.48	Lus10019114*	92889	N	Y		Lu3-4288634	RLK	Lus10019114*
Lu3-4335448	3	4335448	4429497	4430153	0.02	Lus10019120	4429497	4430153	TM-CC				Lus10019120	94049	N	N		Lu3-4335448	TM-CC	Lus10019120
Lu3-4335448	3	4335448	4369569	4371800	0.02	Lus10019113	4369569	4371800	RLK	Lu3-4371542	4371542	0.87	Lus10019113*	34121	N	Y	1	Lu3-4335448	RLK	Lus10019113*
Lu3-4335448	3	4335448	4381523	4388318	0.02	Lus10019114	4381523	4388318	RLK	Lu3-4383881	4383881	7.48	Lus10019114*	46075	N	Y		Lu3-4335448	RLK	Lus10019114*
Lu3-5723804	3	5723804	5746000	5750240	1.52	Lus10040576	5746000	5750240	TNL	Lu3-5747087	5747087	1.19	Lus10040576*	22196	N	Y	1	Lu3-5723804	TNL	Lus10040576*
Lu3-5748445	3	5748445	5828704	5830680	0.37	Lus10040592	5828704	5830680	RLP				Lus10040592	80259	N	N		Lu3-5748445	RLP	Lus10040592
Lu3-5748445	3	5748445	5746000	5750240	0.37	Lus10040576	5746000	5750240	TNL	Lu3-5747087	5747087	1.19	Lus10040576**	0	Y	Y	1	Lu3-5748445	TNL	Lus10040576**
Lu3-6007426	3	6007426	5998536	6001221	0.34	Lus10040620	5998536	6001221	TM-CC				Lus10040620	6205	N	N	1	Lu3-6007426	TM-CC	Lus10040620
Lu3-7963985	3	7963985	8054726	8057356	0.01	Lus10029241	8054726	8057356	RLK				Lus10029241	90741	N	N		Lu3-7963985	RLK	Lus10029241
Lu3-7963985	3	7963985	7962622	7964220	0.01	Lus10029252	7962622	7964220	WRKY	Lu3-7963314	7963314	1.22	Lus10029252*	235	N	Y	1	Lu3-7963985	WRKY	Lus10029252*
Lu3-14062648	3	14062648	14134018	14135147	0.07	Lus10005833	14134018	14135147	TM-CC				Lus10005833	71370	N	N		Lu3-14062648	TM-CC	Lus10005833
Lu3-14062648	3	14062648	14027882	14033536	0.07	Lus10005839	14027882	14033536	TM-CC	Lu3-14027999	14027999	4.01	Lus10005839*	29112	N	Y	1	Lu3-14062648	TM-CC	Lus10005839*
Lu3-14062648	3	14062648	13970596	13976209	0.07	Lus10039458	13970596	13976209	TM-CC	Lu3-13972342	13972342	0.31	Lus10039458*	86439	N	Y		Lu3-14062648	TM-CC	Lus10039458*
Lu3-16821921	3	16821921	16901629	16905201	1.63	Lus10033533	16901629	16905201	RLK				Lus10033533	79708	N	N		Lu3-16821921	RLK	Lus10033533
Lu3-16821921	3	16821921	16736745	16739949	1.63	Lus10008712	16736745	16739949	RLK				Lus10008712	81972	N	N		Lu3-16821921	RLK	Lus10008712
Lu3-16821921	3	16821921	16881292	16888832	1.63	Lus10020500	16881292	16888832	RLK	Lu3-16886341	16886341	2.38	Lus10020500*	59371	N	Y	1	Lu3-16821921	RLK	Lus10020500*
Lu3-19020070	3	19020070	18931785	18933361	1.05	Lus10033857	18931785	18933361	WRKY	Lu3-18931953	18931953	7.18	Lus10033857*	86709	N	Y	1	Lu3-19020070	WRKY	Lus10033857*
Lu3-24637381	3	24637381	24679982	24680260	6.99	Lus10037730	24679982	24680260	RLK				Lus10037730	42601	N	N		Lu3-24637381	RLK	Lus10037730
Lu3-24637381	3	24637381	24656841	24657803	6.99	Lus10037736	24656841	24657803	RLK	Lu3-24657411	24657411	0.11	Lus10037736*	19460	N	Y	1	Lu3-24637381	RLK	Lus10037736*
Lu3-24637381	3	24637381	24676809	24679724	6.99	Lus10037731	24676809	24679724	RLK	Lu3-24678032	24678032	2.07	Lus10037731*	39428	N	Y		Lu3-24637381	RLK	Lus10037731*
Lu3-24637381	3	24637381	24681294	24684669	6.99	Lus10037729	24681294	24684669	RLK	Lu3-24683200	24683200	3.61	Lus10037729*	43913	N	Y		Lu3-24637381	RLK	Lus10037729*
Lu3-24926663	3	24926663	24826326	24827432	0.45	Lus10037705	24826326	24827432	RLP				Lus10037705	99231	N	N		Lu3-24926663	RLP	Lus10037705
Lu3-24926663	3	24926663	24906994	24907854	0.45	Lus10037687	24906994	24907854	RLK	Lu3-24907609	24907609	0.06	Lus10037687*	18809	N	Y	1	Lu3-24926663	RLK	Lus10037687*
Lu3-24926663	3	24926663	24905388	24906946	0.45	Lus10037688	24905388	24906946	RLK	Lu3-24906897	24906897	5.13	Lus10037688*	19717	N	Y		Lu3-24926663	RLK	Lus10037688*
Lu3-24926663	3	24926663	25009138	25009785	0.45	Lus10037667	25009138	25009785	TNL	Lu3-25009351	25009351	4.29	Lus10037667*	82475	N	Y		Lu3-24926663	TNL	Lus10037667*
Lu3-25442243	3	25442243	25427779	25435263	0.27	Lus10037562	25427779	25435263	TM-CC	Lu3-25428717	25428717	1.69	Lus10037562*	6980	N	Y	1	Lu3-25442243	TM-CC	Lus10037562*
Lu4-1125053	4	1125053	1087389	1090380	0.03	Lus10030349	1087389	1090380	DZC	Lu4-1088281	1088281	5.36	Lus10030349*	34673	N	Y	1	Lu4-1125053	DZC	Lus10030349*
Lu4-1125053	4	1125053	1049514	1056697	0.03	Lus10030345	1049514	1056697	TNL	Lu4-1052315	1052315	18.29	Lus10030345*	68356	N	Y		Lu4-1125053	TNL	Lus10030345*
Lu4-1960629	4	1960629	2032507	2032956	0.18	Lus10009833	2032507	2032956	RLK				Lus10009833	71878	N	N	1	Lu4-1960629	RLK	Lus10009833
Lu4-9252639	4	9252639	9303097	9305517	1.53	Lus10013039	9303097	9305517	RLK				Lus10013039	50458	N	N		Lu4-9252639	RLK	Lus10013039
Lu4-9252639	4	9252639	9299219	9301601	1.53	Lus10013040	9299219	9301601	RLK	Lu4-9300859	9300859	2.38	Lus10013040*	46580	N	Y	1	Lu4-9252639	RLK	Lus10013040*
Lu4-11526385	4	11526385	11582820	11585160	10.76	Lus10036725	11582820	11585160	WRKY				Lus10036725	56435	N	N	1	Lu4-11526385	WRKY	Lus10036725
Lu4-11526385	4	11526385	11468188	11468577	10.76	Lus10036704	11468188	11468577	RLK				Lus10036704	57808	N	N		Lu4-11526385	RLK	Lus10036704
Lu4-11526385	4	11526385	11441987	11442748	10.76	Lus10036697	11441987	11442748	RLK				Lus10036697	83637	N	N		Lu4-11526385	RLK	Lus10036697
Lu4-12432479	4	12432479	12461740	12463695	11.51	Lus10036899	12461740	12463695	RLK				Lus10036899	29261	N	N		Lu4-12432479	RLK	Lus10036899
Lu4-12432479	4	12432479	12429035	12433792	11.51	Lus10036891	12429035	12433792	WRKY	Lu4-12432479	12432479	11.51	Lus10036891**	0	Y	Y	1	Lu4-12432479	WRKY	Lus10036891**
Lu4-13869828	4	13869828	13844908	13846808	2.85	Lus10034384	13844908	13846808	RLP	Lu4-13845944	13845944	0.68	Lus10034384*	23020	N	Y	1	Lu4-13869828	RLP	Lus10034384*
Lu4-13869828	4	13869828	13822157	13825163	2.85	Lus10034387	13822157	13825163	TM-CC	Lu4-13823519	13823519	1.48	Lus10034387*	44665	N	Y		Lu4-13869828	TM-CC	Lus10034387*
Lu4-15107754	4	15107754	15185355	15189194	5.65	Lus10041639	15185355	15189194	RLK				Lus10041639	77601	N	N		Lu4-15107754	RLK	Lus10041639
Lu4-15107754	4	15107754	15023270	15024256	5.65	Lus10041606	15023270	15024256	TNL				Lus10041606	83498	N	N		Lu4-15107754	TNL	Lus10041606
Lu4-15107754	4	15107754	15019929	15020549	5.65	Lus10041605	15019929	15020549	TIR	Lu4-15020058	15020058	2.34	Lus10041605*	87205	N	Y	1	Lu4-15107754	TIR	Lus10041605*
Lu4-15155007	4	15155007	15185355	15189194	1.01	Lus10041639	15185355	15189194	RLK				Lus10041639	30348	N	N	1	Lu4-15155007	RLK	Lus10041639
Lu4-16213043	4	16213043	16212942	16215322	3.4	Lus10041860	16212942	16215322	RLK	Lu4-16213043	16213043	3.4	Lus10041860**	0	Y	Y	1	Lu4-16213043	RLK	Lus10041860**
Lu4-17170235	4	17170235	17147750	17148367	10.75	Lus10009109	17147750	17148367	TNL				Lus10009109	21868	N	N		Lu4-17170235	TNL	Lus10009109
Lu4-17170235	4	17170235	17146906	17147707	10.75	Lus10009108	17146906	17147707	TNL				Lus10009108	22528	N	N		Lu4-17170235	TNL	Lus10009108
Lu4-17170235	4	17170235	17141532	17146187	10.75	Lus10009107	17141532	17146187	TNL	Lu4-17143890	17143890	4.11	Lus10009107*	24048	N	Y	1	Lu4-17170235	TNL	Lus10009107*
Lu4-17170235	4	17170235	17129426	17131616	10.75	Lus10004040	17129426	17131616	RLK	Lu4-17130517	17130517	3.38	Lus10004040*	38619	N	Y		Lu4-17170235	RLK	Lus10004040*
Lu4-17170235	4	17170235	17091433	17094723	10.75	Lus10004046	17091433	17094723	RLK	Lu4-17091747	17091747	16.08	Lus10004046*	75512	N	Y		Lu4-17170235	RLK	Lus10004046*
Lu4-17357649	4	17357649	17305881	17309057	0.69	Lus10020779	17305881	17309057	CNL	Lu4-17307206	17307206	0.42	Lus10020779*	48592	N	Y	1	Lu4-17357649	CNL	Lus10020779*
Lu4-17946054	4	17946054	18025000	18027107	1.72	Lus10029905	18025000	18027107	TM-CC	Lu4-18026136	18026136	5.4	Lus10029905*	78946	N	Y	1	Lu4-17946054	TM-CC	Lus10029905*
Lu4-18020755	4	18020755	18025000	18027107	4.85	Lus10029905	18025000	18027107	TM-CC	Lu4-18026136	18026136	5.4	Lus10029905*	4245	N	Y	1	Lu4-18020755	TM-CC	Lus10029905*
Lu4-18020755	4	18020755	18100856	18101804	4.85	Lus10029919	18100856	18101804	TNL	Lu4-18101136	18101136	0.88	Lus10029919*	80101	N	Y		Lu4-18020755	TNL	Lus10029919*
Lu4-18020755	4	18020755	18109092	18112034	4.85	Lus10029921	18109092	18112034	TNL	Lu4-18110741	18110741	5.37	Lus10029921*	88337	N	Y		Lu4-18020755	TNL	Lus10029921*
Lu4-19237210	4	19237210	19198756	19201861	2.81	Lus10039767	19198756	19201861	RLK				Lus10039767	35349	N	N		Lu4-19237210	RLK	Lus10039767
Lu4-19237210	4	19237210	19186606	19189026	2.81	Lus10039762	19186606	19189026	RLK	Lu4-19188752	19188752	0.96	Lus10039762*	48184	N	Y	1	Lu4-19237210	RLK	Lus10039762*
Lu4-19244900	4	19244900	19198756	19201861	2.06	Lus10039767	19198756	19201861	RLK				Lus10039767	43039	N	N		Lu4-19244900	RLK	Lus10039767
Lu4-19244900	4	19244900	19186606	19189026	2.06	Lus10039762	19186606	19189026	RLK	Lu4-19188752	19188752	0.96	Lus10039762*	55874	N	Y	1	Lu4-19244900	RLK	Lus10039762*
Lu5-1333779	5	1333779	1291080	1292029	3.63	Lus10029704	1291080	1292029	CNL	Lu5-1291859	1291859	10.85	Lus10029704*	41750	N	Y	1	Lu5-1333779	CNL	Lus10029704*
Lu5-1333779	5	1333779	1289543	1290535	3.63	Lus10029705	1289543	1290535	CNL	Lu5-1290186	1290186	2.32	Lus10029705*	43244	N	Y		Lu5-1333779	CNL	Lus10029705*
Lu5-1333995	5	1333995	1291080	1292029	3.72	Lus10029704	1291080	1292029	CNL	Lu5-1291859	1291859	10.85	Lus10029704*	41966	N	Y	1	Lu5-1333995	CNL	Lus10029704*
Lu5-1333995	5	1333995	1289543	1290535	3.72	Lus10029705	1289543	1290535	CNL	Lu5-1290186	1290186	2.32	Lus10029705*	43460	N	Y		Lu5-1333995	CNL	Lus10029705*
Lu5-1402378	5	1402378	1449598	1453554	9.96	Lus10004747	1449598	1453554	TNL	Lu5-1449844	1449844	22.47	Lus10004747*	47220	N	Y	1	Lu5-1402378	TNL	Lus10004747*
Lu5-1534998	5	1534998	1534218	1535440	27.83	Lus10004727	1534218	1535440	TNL	Lu5-1534998	1534998	27.83	Lus10004727**	0	Y	Y	1	Lu5-1534998	TNL	Lus10004727**
Lu5-1534998	5	1534998	1535502	1538672	27.83	Lus10004726	1535502	1538672	TNL	Lu5-1535619	1535619	32.6	Lus10004726*	504	N	Y		Lu5-1534998	TNL	Lus10004726*
Lu5-1534998	5	1534998	1568734	1573096	27.83	Lus10004719	1568734	1573096	TNL	Lu5-1570702	1570702	27.63	Lus10004719*	33736	N	Y		Lu5-1534998	TNL	Lus10004719*
Lu5-1534998	5	1534998	1449598	1453554	27.83	Lus10004747	1449598	1453554	TNL	Lu5-1449844	1449844	22.47	Lus10004747*	81444	N	Y		Lu5-1534998	TNL	Lus10004747*
Lu5-1535619	5	1535619	1535502	1538672	32.6	Lus10004726	1535502	1538672	TNL	Lu5-1535619	1535619	32.6	Lus10004726**	0	Y	Y	1	Lu5-1535619	TNL	Lus10004726**
Lu5-1535619	5	1535619	1534218	1535440	32.6	Lus10004727	1534218	1535440	TNL	Lu5-1534998	1534998	27.83	Lus10004727*	179	N	Y		Lu5-1535619	TNL	Lus10004727*
Lu5-1535619	5	1535619	1568734	1573096	32.6	Lus10004719	1568734	1573096	TNL	Lu5-1570702	1570702	27.63	Lus10004719*	33115	N	Y		Lu5-1535619	TNL	Lus10004719*
Lu5-1535619	5	1535619	1449598	1453554	32.6	Lus10004747	1449598	1453554	TNL	Lu5-1449844	1449844	22.47	Lus10004747*	82065	N	Y		Lu5-1535619	TNL	Lus10004747*
Lu5-1552921	5	1552921	1535502	1538672	15	Lus10004726	1535502	1538672	TNL	Lu5-1535619	1535619	32.6	Lus10004726*	14249	N	Y	1	Lu5-1552921	TNL	Lus10004726*
Lu5-1552921	5	1552921	1568734	1573096	15	Lus10004719	1568734	1573096	TNL	Lu5-1570702	1570702	27.63	Lus10004719*	15813	N	Y		Lu5-1552921	TNL	Lus10004719*
Lu5-1552921	5	1552921	1534218	1535440	15	Lus10004727	1534218	1535440	TNL	Lu5-1534998	1534998	27.83	Lus10004727*	17481	N	Y		Lu5-1552921	TNL	Lus10004727*
Lu5-1552921	5	1552921	1642118	1644046	15	Lus10008500	1642118	1644046	TM-CC	Lu5-1642148	1642148	11.15	Lus10008500*	89197	N	Y		Lu5-1552921	TM-CC	Lus10008500*
Lu5-1552921	5	1552921	1449598	1453554	15	Lus10004747	1449598	1453554	TNL	Lu5-1449844	1449844	22.47	Lus10004747*	99367	N	Y		Lu5-1552921	TNL	Lus10004747*
Lu5-1569098	5	1569098	1568734	1573096	20.54	Lus10004719	1568734	1573096	TNL	Lu5-1570702	1570702	27.63	Lus10004719**	0	Y	Y	1	Lu5-1569098	TNL	Lus10004719**
Lu5-1569098	5	1569098	1535502	1538672	20.54	Lus10004726	1535502	1538672	TNL	Lu5-1535619	1535619	32.6	Lus10004726*	30426	N	Y		Lu5-1569098	TNL	Lus10004726*
Lu5-1569098	5	1569098	1534218	1535440	20.54	Lus10004727	1534218	1535440	TNL	Lu5-1534998	1534998	27.83	Lus10004727*	33658	N	Y		Lu5-1569098	TNL	Lus10004727*
Lu5-1569098	5	1569098	1642118	1644046	20.54	Lus10008500	1642118	1644046	TM-CC	Lu5-1642148	1642148	11.15	Lus10008500*	73020	N	Y		Lu5-1569098	TM-CC	Lus10008500*
Lu5-1763832	5	1763832	1714708	1718110	16.34	Lus10008486	1714708	1718110	RLK	Lu5-1715943	1715943	21.9	Lus10008486*	45722	N	Y	1	Lu5-1763832	RLK	Lus10008486*
Lu5-1863116	5	1863116	1900103	1900468	7.25	Lus10029585	1900103	1900468	DIR	Lu5-1900198	1900198	13.16	Lus10029585*	36987	N	Y	1	Lu5-1863116	DIR	Lus10029585*
Lu5-2924824	5	2924824	3005188	3006765	7.82	Lus10032303	3005188	3006765	WRKY	Lu5-3006058	3006058	24.08	Lus10032303*	80364	N	Y	1	Lu5-2924824	WRKY	Lus10032303*
Lu5-2924824	5	2924824	3015482	3018758	7.82	Lus10032306	3015482	3018758	RLK	Lu5-3016997	3016997	15.91	Lus10032306*	90658	N	Y		Lu5-2924824	RLK	Lus10032306*
Lu5-2984120	5	2984120	3005188	3006765	6.08	Lus10032303	3005188	3006765	WRKY	Lu5-3006058	3006058	24.08	Lus10032303*	21068	N	Y	1	Lu5-2984120	WRKY	Lus10032303*
Lu5-2984120	5	2984120	3015482	3018758	6.08	Lus10032306	3015482	3018758	RLK	Lu5-3016997	3016997	15.91	Lus10032306*	31362	N	Y		Lu5-2984120	RLK	Lus10032306*
Lu5-2984120	5	2984120	3052566	3053123	6.08	Lus10032310	3052566	3053123	DIR	Lu5-3052714	3052714	3.12	Lus10032310*	68446	N	Y		Lu5-2984120	DIR	Lus10032310*
Lu5-3006723	5	3006723	3005188	3006765	15.54	Lus10032303	3005188	3006765	WRKY	Lu5-3006058	3006058	24.08	Lus10032303**	0	Y	Y	1	Lu5-3006723	WRKY	Lus10032303**
Lu5-3006723	5	3006723	3015482	3018758	15.54	Lus10032306	3015482	3018758	RLK	Lu5-3016997	3016997	15.91	Lus10032306*	8759	N	Y		Lu5-3006723	RLK	Lus10032306*
Lu5-3006723	5	3006723	3052566	3053123	15.54	Lus10032310	3052566	3053123	DIR	Lu5-3052714	3052714	3.12	Lus10032310*	45843	N	Y		Lu5-3006723	DIR	Lus10032310*
Lu5-3052714	5	3052714	3151181	3151741	3.12	Lus10032331	3151181	3151741	DIR				Lus10032331	98467	N	N		Lu5-3052714	DIR	Lus10032331
Lu5-3052714	5	3052714	3052566	3053123	3.12	Lus10032310	3052566	3053123	DIR	Lu5-3052714	3052714	3.12	Lus10032310**	0	Y	Y	1	Lu5-3052714	DIR	Lus10032310**
Lu5-3052714	5	3052714	3015482	3018758	3.12	Lus10032306	3015482	3018758	RLK	Lu5-3016997	3016997	15.91	Lus10032306*	33956	N	Y		Lu5-3052714	RLK	Lus10032306*
Lu5-3052714	5	3052714	3005188	3006765	3.12	Lus10032303	3005188	3006765	WRKY	Lu5-3006058	3006058	24.08	Lus10032303*	45949	N	Y		Lu5-3052714	WRKY	Lus10032303*
Lu5-3224350	5	3224350	3206387	3209792	10.62	Lus10032345	3206387	3209792	TM-CC				Lus10032345	14558	N	N		Lu5-3224350	TM-CC	Lus10032345
Lu5-3224350	5	3224350	3151181	3151741	10.62	Lus10032331	3151181	3151741	DIR				Lus10032331	72609	N	N		Lu5-3224350	DIR	Lus10032331
Lu5-3224350	5	3224350	3223137	3225286	10.62	Lus10032351	3223137	3225286	RLK	Lu5-3224350	3224350	10.62	Lus10032351**	0	Y	Y	1	Lu5-3224350	RLK	Lus10032351**
Lu5-3281960	5	3281960	3336787	3338055	18.38	Lus10032372	3336787	3338055	WRKY				Lus10032372	54827	N	N	1	Lu5-3281960	WRKY	Lus10032372
Lu5-3281960	5	3281960	3206387	3209792	18.38	Lus10032345	3206387	3209792	TM-CC				Lus10032345	72168	N	N		Lu5-3281960	TM-CC	Lus10032345
Lu5-3281960	5	3281960	3223137	3225286	18.38	Lus10032351	3223137	3225286	RLK	Lu5-3224350	3224350	10.62	Lus10032351*	56674	N	Y		Lu5-3281960	RLK	Lus10032351*
Lu5-3299224	5	3299224	3336787	3338055	2.42	Lus10032372	3336787	3338055	WRKY				Lus10032372	37563	N	N	1	Lu5-3299224	WRKY	Lus10032372
Lu5-3299224	5	3299224	3206387	3209792	2.42	Lus10032345	3206387	3209792	TM-CC				Lus10032345	89432	N	N		Lu5-3299224	TM-CC	Lus10032345
Lu5-3299224	5	3299224	3223137	3225286	2.42	Lus10032351	3223137	3225286	RLK	Lu5-3224350	3224350	10.62	Lus10032351*	73938	N	Y		Lu5-3299224	RLK	Lus10032351*
Lu5-4646212	5	4646212	4643996	4646254	9.31	Lus10034795	4643996	4646254	RLK	Lu5-4646212	4646212	9.31	Lus10034795**	0	Y	Y	1	Lu5-4646212	RLK	Lus10034795**
Lu5-11927728	5	11927728	11928683	11929954	6.44	Lus10035284	11928683	11929954	RLK				Lus10035284	955	N	N	1	Lu5-11927728	RLK	Lus10035284
Lu5-11927728	5	11927728	11946804	11949399	6.44	Lus10035286	11946804	11949399	WRKY				Lus10035286	19076	N	N		Lu5-11927728	WRKY	Lus10035286
Lu5-13271207	5	13271207	13270430	13273781	34.99	Lus10029860	13270430	13273781	TNL	Lu5-13271207	13271207	34.99	Lus10029860**	0	Y	Y	1	Lu5-13271207	TNL	Lus10029860**
Lu5-13271207	5	13271207	13281128	13282411	34.99	Lus10029858	13281128	13282411	TNL	Lu5-13281348	13281348	30.02	Lus10029858*	9921	N	Y		Lu5-13271207	TNL	Lus10029858*
Lu5-14736164	5	14736164	14645525	14648823	5.46	Lus10028440	14645525	14648823	MLO				Lus10028440	87341	N	N		Lu5-14736164	MLO	Lus10028440
Lu5-14736164	5	14736164	14775502	14778154	5.46	Lus10028407	14775502	14778154	RLK	Lu5-14775739	14775739	4.72	Lus10028407*	39338	N	Y	1	Lu5-14736164	RLK	Lus10028407*
Lu5-14835625	5	14835625	14775502	14778154	5.15	Lus10028407	14775502	14778154	RLK	Lu5-14775739	14775739	4.72	Lus10028407*	57471	N	Y	1	Lu5-14835625	RLK	Lus10028407*
Lu5-14967901	5	14967901	15020577	15021749	17.28	Lus10028359	15020577	15021749	RLP	Lu5-15021564	15021564	21.68	Lus10028359*	52676	N	Y	1	Lu5-14967901	RLP	Lus10028359*
Lu5-14977699	5	14977699	15077659	15081716	16.32	Lus10028347	15077659	15081716	RLK				Lus10028347	99960	N	N		Lu5-14977699	RLK	Lus10028347
Lu5-14977699	5	14977699	15020577	15021749	16.32	Lus10028359	15020577	15021749	RLP	Lu5-15021564	15021564	21.68	Lus10028359*	42878	N	Y	1	Lu5-14977699	RLP	Lus10028359*
Lu5-15681773	5	15681773	15624852	15631121	8.71	Lus10024062	15624852	15631121	RLK				Lus10024062	50652	N	N		Lu5-15681773	RLK	Lus10024062
Lu5-15681773	5	15681773	15611592	15617378	8.71	Lus10024061	15611592	15617378	RLK				Lus10024061	64395	N	N		Lu5-15681773	RLK	Lus10024061
Lu5-15681773	5	15681773	15698530	15699898	8.71	Lus10024074	15698530	15699898	WRKY	Lu5-15699779	15699779	10.75	Lus10024074*	16757	N	Y	1	Lu5-15681773	WRKY	Lus10024074*
Lu5-15681773	5	15681773	15650262	15653487	8.71	Lus10024064	15650262	15653487	RLK	Lu5-15651395	15651395	15.73	Lus10024064*	28286	N	Y		Lu5-15681773	RLK	Lus10024064*
Lu5-15681773	5	15681773	15635008	15648806	8.71	Lus10024063	15635008	15648806	RLK	Lu5-15647990	15647990	12.34	Lus10024063*	32967	N	Y		Lu5-15681773	RLK	Lus10024063*
Lu5-15681773	5	15681773	15725123	15728803	8.71	Lus10024081	15725123	15728803	RLK	Lu5-15727877	15727877	22.77	Lus10024081*	43350	N	Y		Lu5-15681773	RLK	Lus10024081*
Lu5-15681773	5	15681773	15601599	15607466	8.71	Lus10024060	15601599	15607466	RLK	Lu5-15602709	15602709	1.66	Lus10024060*	74307	N	Y		Lu5-15681773	RLK	Lus10024060*
Lu5-15697144	5	15697144	15624852	15631121	25.18	Lus10024062	15624852	15631121	RLK				Lus10024062	66023	N	N		Lu5-15697144	RLK	Lus10024062
Lu5-15697144	5	15697144	15611592	15617378	25.18	Lus10024061	15611592	15617378	RLK				Lus10024061	79766	N	N		Lu5-15697144	RLK	Lus10024061
Lu5-15697144	5	15697144	15698530	15699898	25.18	Lus10024074	15698530	15699898	WRKY	Lu5-15699779	15699779	10.75	Lus10024074*	1386	N	Y	1	Lu5-15697144	WRKY	Lus10024074*
Lu5-15697144	5	15697144	15725123	15728803	25.18	Lus10024081	15725123	15728803	RLK	Lu5-15727877	15727877	22.77	Lus10024081*	27979	N	Y		Lu5-15697144	RLK	Lus10024081*
Lu5-15697144	5	15697144	15650262	15653487	25.18	Lus10024064	15650262	15653487	RLK	Lu5-15651395	15651395	15.73	Lus10024064*	43657	N	Y		Lu5-15697144	RLK	Lus10024064*
Lu5-15697144	5	15697144	15635008	15648806	25.18	Lus10024063	15635008	15648806	RLK	Lu5-15647990	15647990	12.34	Lus10024063*	48338	N	Y		Lu5-15697144	RLK	Lus10024063*
Lu5-15697144	5	15697144	15601599	15607466	25.18	Lus10024060	15601599	15607466	RLK	Lu5-15602709	15602709	1.66	Lus10024060*	89678	N	Y		Lu5-15697144	RLK	Lus10024060*
Lu5-16602027	5	16602027	16636867	16641182	20.88	Lus10039641	16636867	16641182	RLK				Lus10039641	34840	N	N	1	Lu5-16602027	RLK	Lus10039641
Lu5-16840013	5	16840013	16922051	16922660	29.67	Lus10039698	16922051	16922660	RLK				Lus10039698	82038	N	N	1	Lu5-16840013	RLK	Lus10039698
Lu5-16840013	5	16840013	16923316	16925783	29.67	Lus10039699	16923316	16925783	RLK	Lu5-16925120	16925120	11.35	Lus10039699*	83303	N	Y		Lu5-16840013	RLK	Lus10039699*
Lu6-1883039	6	1883039	1878670	1885283	0.59	Lus10017649	1878670	1885283	RLK	Lu6-1881393	1881393	11.79	Lus10017649**	0	Y	Y	1	Lu6-1883039	RLK	Lus10017649**
Lu6-2088512	6	2088512	2049388	2051511	0.62	Lus10017611	2049388	2051511	RLK	Lu6-2051260	2051260	2.24	Lus10017611*	37001	N	Y	1	Lu6-2088512	RLK	Lus10017611*
Lu6-3267375	6	3267375	3366421	3373233	5.14	Lus10019453	3366421	3373233	RLK				Lus10019453	99046	N	N		Lu6-3267375	RLK	Lus10019453
Lu6-5384325	6	5384325	5352043	5356399	1.6	Lus10032449	5352043	5356399	TM-CC				Lus10032449	27926	N	N	1	Lu6-5384325	TM-CC	Lus10032449
Lu6-5384325	6	5384325	5482883	5483860	1.6	Lus10032438	5482883	5483860	RLK				Lus10032438	98558	N	N		Lu6-5384325	RLK	Lus10032438
Lu6-5796778	6	5796778	5829864	5832029	2.41	Lus10017727	5829864	5832029	RLP				Lus10017727	33086	N	N	1	Lu6-5796778	RLP	Lus10017727
Lu6-5796778	6	5796778	5718165	5721746	2.41	Lus10036672	5718165	5721746	RLK	Lu6-5721011	5721011	2.68	Lus10036672*	75032	N	Y		Lu6-5796778	RLK	Lus10036672*
Lu6-14339498	6	14339498	14432270	14433022	8.44	Lus10025063	14432270	14433022	DIR				Lus10025063	92772	N	N	1	Lu6-14339498	DIR	Lus10025063
Lu6-14339498	6	14339498	14436889	14437416	8.44	Lus10025064	14436889	14437416	DIR				Lus10025064	97391	N	N		Lu6-14339498	DIR	Lus10025064
Lu6-14339498	6	14339498	14438998	14439717	8.44	Lus10025065	14438998	14439717	DIR				Lus10025065	99500	N	N		Lu6-14339498	DIR	Lus10025065
Lu6-14405712	6	14405712	14432270	14433022	6.65	Lus10025063	14432270	14433022	DIR				Lus10025063	26558	N	N	1	Lu6-14405712	DIR	Lus10025063
Lu6-14405712	6	14405712	14436889	14437416	6.65	Lus10025064	14436889	14437416	DIR				Lus10025064	31177	N	N		Lu6-14405712	DIR	Lus10025064
Lu6-14405712	6	14405712	14438998	14439717	6.65	Lus10025065	14438998	14439717	DIR				Lus10025065	33286	N	N		Lu6-14405712	DIR	Lus10025065
Lu6-14405712	6	14405712	14443424	14444014	6.65	Lus10025067	14443424	14444014	DIR				Lus10025067	37712	N	N		Lu6-14405712	DIR	Lus10025067
Lu6-15378264	6	15378264	15477978	15480078	0.62	Lus10021022	15477978	15480078	RLK				Lus10021022	99714	N	N		Lu6-15378264	RLK	Lus10021022
Lu6-15378264	6	15378264	15376945	15378903	0.62	Lus10021001	15376945	15378903	RLP	Lu6-15377482	15377482	0.8	Lus10021001**	0	Y	Y	1	Lu6-15378264	RLP	Lus10021001**
Lu6-15378264	6	15378264	15385416	15390253	0.62	Lus10021003	15385416	15390253	RLK	Lu6-15388684	15388684	0.84	Lus10021003*	7152	N	Y		Lu6-15378264	RLK	Lus10021003*
Lu6-16666521	6	16666521	16644297	16646375	0.42	Lus10025210	16644297	16646375	RLK				Lus10025210	20146	N	N		Lu6-16666521	RLK	Lus10025210
Lu6-16666521	6	16666521	16664523	16666663	0.42	Lus10025216	16664523	16666663	WRKY	Lu6-16666313	16666313	1.13	Lus10025216**	0	Y	Y	1	Lu6-16666521	WRKY	Lus10025216**
Lu6-16666521	6	16666521	16686849	16689706	0.42	Lus10025223	16686849	16689706	RLK	Lu6-16687317	16687317	1.57	Lus10025223*	20328	N	Y		Lu6-16666521	RLK	Lus10025223*
Lu6-16837004	6	16837004	16773894	16774565	4.15	Lus10025242	16773894	16774565	RLK				Lus10025242	62439	N	N	1	Lu6-16837004	RLK	Lus10025242
Lu6-16849336	6	16849336	16773894	16774565	5.03	Lus10025242	16773894	16774565	RLK				Lus10025242	74771	N	N		Lu6-16849336	RLK	Lus10025242
Lu6-16849336	6	16849336	16937894	16938394	5.03	Lus10025274	16937894	16938394	DIR	Lu6-16937960	16937960	1.67	Lus10025274*	88558	N	Y	1	Lu6-16849336	DIR	Lus10025274*
Lu6-17011481	6	17011481	16958731	16960974	0.4	Lus10025281	16958731	16960974	TM-CC	Lu6-16959261	16959261	3.41	Lus10025281*	50507	N	Y	1	Lu6-17011481	TM-CC	Lus10025281*
Lu6-17011481	6	17011481	16937894	16938394	0.4	Lus10025274	16937894	16938394	DIR	Lu6-16937960	16937960	1.67	Lus10025274*	73087	N	Y		Lu6-17011481	DIR	Lus10025274*
Lu6-17035443	6	17035443	16958731	16960974	0.02	Lus10025281	16958731	16960974	TM-CC	Lu6-16959261	16959261	3.41	Lus10025281*	74469	N	Y	1	Lu6-17035443	TM-CC	Lus10025281*
Lu6-17035443	6	17035443	16937894	16938394	0.02	Lus10025274	16937894	16938394	DIR	Lu6-16937960	16937960	1.67	Lus10025274*	97049	N	Y		Lu6-17035443	DIR	Lus10025274*
Lu6-17056600	6	17056600	16958731	16960974	1.01	Lus10025281	16958731	16960974	TM-CC	Lu6-16959261	16959261	3.41	Lus10025281*	95626	N	Y	1	Lu6-17056600	TM-CC	Lus10025281*
Lu7-2731752	7	2731752	2695771	2698659	6.28	Lus10012193	2695771	2698659	RLK	Lu7-2698149	2698149	3.09	Lus10012193*	33093	N	Y	1	Lu7-2731752	RLK	Lus10012193*
Lu7-2864158	7	2864158	2838905	2841730	2.41	Lus10011302	2838905	2841730	RLK				Lus10011302	22428	N	N	1	Lu7-2864158	RLK	Lus10011302
Lu7-3425810	7	3425810	3467614	3471603	1.7	Lus10023487	3467614	3471603	TNL	Lu7-3471311	3471311	9.21	Lus10023487*	41804	N	Y	1	Lu7-3425810	TNL	Lus10023487*
Lu7-3425810	7	3425810	3368906	3372339	1.7	Lus10023506	3368906	3372339	MLO	Lu7-3369629	3369629	2.28	Lus10023506*	53471	N	Y		Lu7-3425810	MLO	Lus10023506*
Lu7-4389073	7	4389073	4311389	4312487	0.77	Lus10040208	4311389	4312487	CNL				Lus10040208	76586	N	N		Lu7-4389073	CNL	Lus10040208
Lu7-4389073	7	4389073	4309085	4309381	0.77	Lus10040210	4309085	4309381	CNL				Lus10040210	79692	N	N		Lu7-4389073	CNL	Lus10040210
Lu7-4389073	7	4389073	4376947	4380527	0.77	Lus10040196	4376947	4380527	TM-CC	Lu7-4379634	4379634	3.45	Lus10040196*	8546	N	Y	1	Lu7-4389073	TM-CC	Lus10040196*
Lu7-4389073	7	4389073	4443831	4446900	0.77	Lus10040186	4443831	4446900	RLK	Lu7-4443949	4443949	1.73	Lus10040186*	54758	N	Y		Lu7-4389073	RLK	Lus10040186*
Lu7-4389073	7	4389073	4447672	4450144	0.77	Lus10040185	4447672	4450144	RLK	Lu7-4448613	4448613	1.38	Lus10040185*	58599	N	Y		Lu7-4389073	RLK	Lus10040185*
Lu7-4389073	7	4389073	4450196	4451089	0.77	Lus10040184	4450196	4451089	RLK	Lu7-4451062	4451062	2.46	Lus10040184*	61123	N	Y		Lu7-4389073	RLK	Lus10040184*
Lu7-7556076	7	7556076	7619941	7623178	1.35	Lus10006028	7619941	7623178	RLK				Lus10006028	63865	N	N	1	Lu7-7556076	RLK	Lus10006028
Lu7-17007593	7	17007593	16967785	16968282	22.62	Lus10015465	16967785	16968282	TNL				Lus10015465	39311	N	N		Lu7-17007593	TNL	Lus10015465
Lu7-17007593	7	17007593	16928445	16928858	22.62	Lus10015472	16928445	16928858	RLK				Lus10015472	78735	N	N		Lu7-17007593	RLK	Lus10015472
Lu7-17007593	7	17007593	16979755	16981169	22.62	Lus10015461	16979755	16981169	MLO	Lu7-16980131	16980131	3.5	Lus10015461*	26424	N	Y	1	Lu7-17007593	MLO	Lus10015461*
Lu7-17359522	7	17359522	17357355	17360952	0.73	Lus10023199	17357355	17360952	TM-CC	Lu7-17359522	17359522	0.73	Lus10023199**	0	Y	Y	1	Lu7-17359522	TM-CC	Lus10023199**
Lu7-17659649	7	17659649	17657006	17660870	4.85	Lus10003971	17657006	17660870	TM-CC	Lu7-17659649	17659649	4.85	Lus10003971**	0	Y	Y	1	Lu7-17659649	TM-CC	Lus10003971**
Lu8-7394085	8	7394085	7386368	7423024	1.62	Lus10021849	7386368	7423024	RLK	Lu8-7414536	7414536	3.65	Lus10021849**	0	Y	Y	1	Lu8-7394085	RLK	Lus10021849**
Lu8-14560362	8	14560362	14505473	14508403	1.12	Lus10016649	14505473	14508403	TM-CC				Lus10016649	51959	N	N	1	Lu8-14560362	TM-CC	Lus10016649
Lu8-15837449	8	15837449	15884227	15885568	2.44	Lus10022243	15884227	15885568	TM-CC				Lus10022243	46778	N	N	1	Lu8-15837449	TM-CC	Lus10022243
Lu8-15837449	8	15837449	15885633	15886882	2.44	Lus10022244	15885633	15886882	TM-CC	Lu8-15886477	15886477	0.25	Lus10022244*	48184	N	Y		Lu8-15837449	TM-CC	Lus10022244*
Lu8-15998682	8	15998682	16084319	16084564	0.85	Lus10022278	16084319	16084564	WRKY				Lus10022278	85637	N	N		Lu8-15998682	WRKY	Lus10022278
Lu8-15998682	8	15998682	15999079	16001545	0.85	Lus10022265	15999079	16001545	RLK	Lu8-15999956	15999956	1.36	Lus10022265*	397	N	Y	1	Lu8-15998682	RLK	Lus10022265*
Lu8-15999956	8	15999956	16084319	16084564	1.36	Lus10022278	16084319	16084564	WRKY				Lus10022278	84363	N	N		Lu8-15999956	WRKY	Lus10022278
Lu8-15999956	8	15999956	15999079	16001545	1.36	Lus10022265	15999079	16001545	RLK	Lu8-15999956	15999956	1.36	Lus10022265**	0	Y	Y	1	Lu8-15999956	RLK	Lus10022265**
Lu8-16129107	8	16129107	16119574	16121020	3.77	Lus10022286	16119574	16121020	RLK				Lus10022286	8087	N	N	1	Lu8-16129107	RLK	Lus10022286
Lu8-16129107	8	16129107	16118594	16119337	3.77	Lus10022285	16118594	16119337	RLK				Lus10022285	9770	N	N		Lu8-16129107	RLK	Lus10022285
Lu8-16129107	8	16129107	16084319	16084564	3.77	Lus10022278	16084319	16084564	WRKY				Lus10022278	44543	N	N		Lu8-16129107	WRKY	Lus10022278
Lu8-17997267	8	17997267	18086260	18088674	1.2	Lus10010992	18086260	18088674	RLK	Lu8-18088183	18088183	0.7	Lus10010992*	88993	N	Y	1	Lu8-17997267	RLK	Lus10010992*
Lu8-18351964	8	18351964	18276064	18278228	11.49	Lus10007826	18276064	18278228	TNL				Lus10007826	73736	N	N		Lu8-18351964	TNL	Lus10007826
Lu8-18351964	8	18351964	18350700	18354799	11.49	Lus10007812	18350700	18354799	TNL	Lu8-18351964	18351964	11.49	Lus10007812**	0	Y	Y	1	Lu8-18351964	TNL	Lus10007812**
Lu8-18351964	8	18351964	18344363	18349288	11.49	Lus10007813	18344363	18349288	TNL	Lu8-18347195	18347195	9.29	Lus10007813*	2676	N	Y		Lu8-18351964	TNL	Lus10007813*
Lu8-18351964	8	18351964	18359124	18363387	11.49	Lus10007811	18359124	18363387	TNL	Lu8-18363139	18363139	5.11	Lus10007811*	7160	N	Y		Lu8-18351964	TNL	Lus10007811*
Lu8-18351964	8	18351964	18335847	18340501	11.49	Lus10007814	18335847	18340501	TNL	Lu8-18336585	18336585	5	Lus10007814*	11463	N	Y		Lu8-18351964	TNL	Lus10007814*
Lu8-18351964	8	18351964	18366041	18370123	11.49	Lus10007810	18366041	18370123	TNL	Lu8-18368580	18368580	6.69	Lus10007810*	14077	N	Y		Lu8-18351964	TNL	Lus10007810*
Lu8-18351964	8	18351964	18372540	18375566	11.49	Lus10007809	18372540	18375566	TNL	Lu8-18374416	18374416	2.91	Lus10007809*	20576	N	Y		Lu8-18351964	TNL	Lus10007809*
Lu8-18351964	8	18351964	18376722	18380935	11.49	Lus10007808	18376722	18380935	TNL	Lu8-18378560	18378560	3.42	Lus10007808*	24758	N	Y		Lu8-18351964	TNL	Lus10007808*
Lu8-18351964	8	18351964	18309564	18313636	11.49	Lus10007821	18309564	18313636	TNL	Lu8-18310324	18310324	2.74	Lus10007821*	38328	N	Y		Lu8-18351964	TNL	Lus10007821*
Lu8-18351964	8	18351964	18299941	18302829	11.49	Lus10007822	18299941	18302829	TNL	Lu8-18300319	18300319	1.77	Lus10007822*	49135	N	Y		Lu8-18351964	TNL	Lus10007822*
Lu8-18351964	8	18351964	18281240	18285241	11.49	Lus10007825	18281240	18285241	TNL	Lu8-18283048	18283048	4.74	Lus10007825*	66723	N	Y		Lu8-18351964	TNL	Lus10007825*
Lu8-18351964	8	18351964	18275570	18276061	11.49	Lus10007827	18275570	18276061	TNL	Lu8-18275615	18275615	0.81	Lus10007827*	75903	N	Y		Lu8-18351964	TNL	Lus10007827*
Lu8-18351964	8	18351964	18271093	18275151	11.49	Lus10007828	18271093	18275151	TNL	Lu8-18272418	18272418	3.08	Lus10007828*	76813	N	Y		Lu8-18351964	TNL	Lus10007828*
Lu8-18351964	8	18351964	18263872	18267734	11.49	Lus10007829	18263872	18267734	TNL	Lu8-18266233	18266233	4.41	Lus10007829*	84230	N	Y		Lu8-18351964	TNL	Lus10007829*
Lu8-18351964	8	18351964	18260420	18262824	11.49	Lus10007830	18260420	18262824	TNL	Lu8-18262401	18262401	2.09	Lus10007830*	89140	N	Y		Lu8-18351964	TNL	Lus10007830*
Lu8-18351964	8	18351964	18254394	18258346	11.49	Lus10007831	18254394	18258346	TNL	Lu8-18258236	18258236	3.43	Lus10007831*	93618	N	Y		Lu8-18351964	TNL	Lus10007831*
Lu8-18946459	8	18946459	19028964	19030371	0.05	Lus10002248	19028964	19030371	NL				Lus10002248	82505	N	N		Lu8-18946459	NL	Lus10002248
Lu8-18946459	8	18946459	19020694	19023979	0.05	Lus10002247	19020694	19023979	TNL	Lu8-19022430	19022430	14.91	Lus10002247*	74235	N	Y	1	Lu8-18946459	TNL	Lus10002247*
Lu8-18946459	8	18946459	19037487	19042009	0.05	Lus10002249	19037487	19042009	TNL	Lu8-19040276	19040276	15.67	Lus10002249*	91028	N	Y		Lu8-18946459	TNL	Lus10002249*
Lu8-18951212	8	18951212	19028964	19030371	12.48	Lus10002248	19028964	19030371	NL				Lus10002248	77752	N	N		Lu8-18951212	NL	Lus10002248
Lu8-18951212	8	18951212	19046619	19047488	12.48	Lus10002250	19046619	19047488	TNL				Lus10002250	95407	N	N		Lu8-18951212	TNL	Lus10002250
Lu8-18951212	8	18951212	19020694	19023979	12.48	Lus10002247	19020694	19023979	TNL	Lu8-19022430	19022430	14.91	Lus10002247*	69482	N	Y	1	Lu8-18951212	TNL	Lus10002247*
Lu8-18951212	8	18951212	19037487	19042009	12.48	Lus10002249	19037487	19042009	TNL	Lu8-19040276	19040276	15.67	Lus10002249*	86275	N	Y		Lu8-18951212	TNL	Lus10002249*
Lu8-19040276	8	19040276	19046619	19047488	15.67	Lus10002250	19046619	19047488	TNL				Lus10002250	6343	N	N		Lu8-19040276	TNL	Lus10002250
Lu8-19040276	8	19040276	19028964	19030371	15.67	Lus10002248	19028964	19030371	NL				Lus10002248	9905	N	N		Lu8-19040276	NL	Lus10002248
Lu8-19040276	8	19040276	19037487	19042009	15.67	Lus10002249	19037487	19042009	TNL	Lu8-19040276	19040276	15.67	Lus10002249**	0	Y	Y	1	Lu8-19040276	TNL	Lus10002249**
Lu8-19040276	8	19040276	19020694	19023979	15.67	Lus10002247	19020694	19023979	TNL	Lu8-19022430	19022430	14.91	Lus10002247*	16297	N	Y		Lu8-19040276	TNL	Lus10002247*
Lu8-19197787	8	19197787	19172422	19173282	0.22	Lus10006317	19172422	19173282	DIR	Lu8-19172688	19172688	3.44	Lus10006317*	24505	N	Y	1	Lu8-19197787	DIR	Lus10006317*
Lu8-22034371	8	22034371	22017713	22018966	2.27	Lus10006611	22017713	22018966	RLP	Lu8-22018760	22018760	3.95	Lus10006611*	15405	N	Y	1	Lu8-22034371	RLP	Lus10006611*
Lu8-22034371	8	22034371	22013669	22014085	2.27	Lus10006610	22013669	22014085	RLP	Lu8-22013810	22013810	2.37	Lus10006610*	20286	N	Y		Lu8-22034371	RLP	Lus10006610*
Lu8-23605626	8	23605626	23623813	23626346	1.31	Lus10018382	23623813	23626346	RLK				Lus10018382	18187	N	N		Lu8-23605626	RLK	Lus10018382
Lu8-23605626	8	23605626	23628565	23630110	1.31	Lus10018380	23628565	23630110	RLK				Lus10018380	22939	N	N		Lu8-23605626	RLK	Lus10018380
Lu8-23605626	8	23605626	23642395	23642996	1.31	Lus10018378	23642395	23642996	RLK				Lus10018378	36769	N	N		Lu8-23605626	RLK	Lus10018378
Lu8-23605626	8	23605626	23627590	23628563	1.31	Lus10018381	23627590	23628563	RLK	Lu8-23628288	23628288	2.03	Lus10018381*	21964	N	Y	1	Lu8-23605626	RLK	Lus10018381*
Lu8-23605626	8	23605626	23632142	23635799	1.31	Lus10018379	23632142	23635799	RLK	Lu8-23632669	23632669	7.06	Lus10018379*	26516	N	Y		Lu8-23605626	RLK	Lus10018379*
Lu8-23605626	8	23605626	23643099	23647937	1.31	Lus10018377	23643099	23647937	RLK	Lu8-23643301	23643301	7.08	Lus10018377*	37473	N	Y		Lu8-23605626	RLK	Lus10018377*
Lu8-23605626	8	23605626	23532325	23535966	1.31	Lus10018402	23532325	23535966	RLK	Lu8-23532972	23532972	0.83	Lus10018402*	69660	N	Y		Lu8-23605626	RLK	Lus10018402*
Lu8-23605626	8	23605626	23513943	23517004	1.31	Lus10018406	23513943	23517004	RLK	Lu8-23514395	23514395	0.5	Lus10018406*	88622	N	Y		Lu8-23605626	RLK	Lus10018406*
Lu8-23605626	8	23605626	23510740	23513809	1.31	Lus10018407	23510740	23513809	RLK	Lu8-23512367	23512367	0.13	Lus10018407*	91817	N	Y		Lu8-23605626	RLK	Lus10018407*
Lu8-23605626	8	23605626	23505978	23510072	1.31	Lus10018408	23505978	23510072	RLK	Lu8-23507463	23507463	0.24	Lus10018408*	95554	N	Y		Lu8-23605626	RLK	Lus10018408*
Lu9-916748	9	916748	911825	917007	1.71	Lus10010221	911825	917007	TNL	Lu9-916748	916748	1.71	Lus10010221**	0	Y	Y	1	Lu9-916748	TNL	Lus10010221**
Lu9-916748	9	916748	918523	919456	1.71	Lus10010222	918523	919456	TNL	Lu9-919052	919052	0.96	Lus10010222*	1775	N	Y		Lu9-916748	TNL	Lus10010222*
Lu9-916748	9	916748	919710	925108	1.71	Lus10010223	919710	925108	TNL	Lu9-920444	920444	27.01	Lus10010223*	2962	N	Y		Lu9-916748	TNL	Lus10010223*
Lu9-916748	9	916748	856536	866728	1.71	Lus10010209	856536	866728	RLK	Lu9-856831	856831	0.95	Lus10010209*	50020	N	Y		Lu9-916748	RLK	Lus10010209*
Lu9-916748	9	916748	981387	984278	1.71	Lus10007516	981387	984278	RLK	Lu9-982975	982975	1.21	Lus10007516*	64639	N	Y		Lu9-916748	RLK	Lus10007516*
Lu9-1068580	9	1068580	1084029	1084604	0.76	Lus10028980	1084029	1084604	RLK	Lu9-1084078	1084078	0.53	Lus10028980*	15449	N	Y	1	Lu9-1068580	RLK	Lus10028980*
Lu9-1068580	9	1068580	981387	984278	0.76	Lus10007516	981387	984278	RLK	Lu9-982975	982975	1.21	Lus10007516*	84302	N	Y		Lu9-1068580	RLK	Lus10007516*
Lu9-1999100	9	1999100	2046907	2049680	1.21	Lus10017478	2046907	2049680	RLK				Lus10017478	47807	N	N	1	Lu9-1999100	RLK	Lus10017478
Lu9-3040038	9	3040038	3042912	3049492	0.22	Lus10007596	3042912	3049492	EDR	Lu9-3049336	3049336	3.61	Lus10007596*	2874	N	Y	1	Lu9-3040038	EDR	Lus10007596*
Lu9-3040038	9	3040038	3083474	3088890	0.22	Lus10007587	3083474	3088890	RLK	Lu9-3084881	3084881	5.51	Lus10007587*	43436	N	Y		Lu9-3040038	RLK	Lus10007587*
Lu9-3234392	9	3234392	3295804	3298169	0.59	Lus10007543	3295804	3298169	RLK				Lus10007543	61412	N	N	1	Lu9-3234392	RLK	Lus10007543
Lu9-3389033	9	3389033	3295804	3298169	0.61	Lus10007543	3295804	3298169	RLK				Lus10007543	90864	N	N		Lu9-3389033	RLK	Lus10007543
Lu9-3389033	9	3389033	3458671	3461533	0.61	Lus10040500	3458671	3461533	RLK	Lu9-3458731	3458731	3.23	Lus10040500*	69638	N	Y	1	Lu9-3389033	RLK	Lus10040500*
Lu9-3920670	9	3920670	4010807	4014021	20.89	Lus10040388	4010807	4014021	MLO				Lus10040388	90137	N	N	1	Lu9-3920670	MLO	Lus10040388
Lu9-4948236	9	4948236	4972365	4975644	10.59	Lus10028279	4972365	4975644	CNL				Lus10028279	24129	N	N	1	Lu9-4948236	CNL	Lus10028279
Lu9-4948236	9	4948236	5039187	5042259	10.59	Lus10028292	5039187	5042259	TM-CC	Lu9-5039545	5039545	3.19	Lus10028292*	90951	N	Y		Lu9-4948236	TM-CC	Lus10028292*
Lu9-5067368	9	5067368	4972365	4975644	3.2	Lus10028279	4972365	4975644	CNL				Lus10028279	91724	N	N		Lu9-5067368	CNL	Lus10028279
Lu9-5067368	9	5067368	5039187	5042259	3.2	Lus10028292	5039187	5042259	TM-CC	Lu9-5039545	5039545	3.19	Lus10028292*	25109	N	Y	1	Lu9-5067368	TM-CC	Lus10028292*
Lu9-5067368	9	5067368	5131906	5138235	3.2	Lus10004388	5131906	5138235	RLK	Lu9-5135786	5135786	2.4	Lus10004388*	64538	N	Y		Lu9-5067368	RLK	Lus10004388*
Lu9-6266682	9	6266682	6265980	6269593	0.77	Lus10031043	6265980	6269593	RLK	Lu9-6266568	6266568	1.47	Lus10031043**	0	Y	Y	1	Lu9-6266682	RLK	Lus10031043**
Lu9-6273089	9	6273089	6265980	6269593	0.46	Lus10031043	6265980	6269593	RLK	Lu9-6266568	6266568	1.47	Lus10031043*	3496	N	Y	1	Lu9-6273089	RLK	Lus10031043*
Lu9-8499442	9	8499442	8529175	8532321	13.4	Lus10011609	8529175	8532321	RLK	Lu9-8529416	8529416	1.98	Lus10011609*	29733	N	Y	1	Lu9-8499442	RLK	Lus10011609*
Lu9-8516150	9	8516150	8529175	8532321	7.96	Lus10011609	8529175	8532321	RLK	Lu9-8529416	8529416	1.98	Lus10011609*	13025	N	Y	1	Lu9-8516150	RLK	Lus10011609*
Lu9-18464274	9	18464274	18512773	18516667	1.87	Lus10007722	18512773	18516667	TNL	Lu9-18513579	18513579	3.18	Lus10007722*	48499	N	Y	1	Lu9-18464274	TNL	Lus10007722*
Lu9-18489770	9	18489770	18512773	18516667	0.34	Lus10007722	18512773	18516667	TNL	Lu9-18513579	18513579	3.18	Lus10007722*	23003	N	Y	1	Lu9-18489770	TNL	Lus10007722*
Lu9-19185021	9	19185021	19227035	19228510	3.99	Lus10024864	19227035	19228510	WRKY				Lus10024864	42014	N	N	1	Lu9-19185021	WRKY	Lus10024864
Lu9-19422735	9	19422735	19428084	19428923	0.03	Lus10024900	19428084	19428923	RLK				Lus10024900	5349	N	N		Lu9-19422735	RLK	Lus10024900
Lu9-19422735	9	19422735	19349782	19354051	0.03	Lus10024886	19349782	19354051	TNL	Lu9-19352483	19352483	7.31	Lus10024886*	68684	N	Y	1	Lu9-19422735	TNL	Lus10024886*
Lu9-19697038	9	19697038	19729257	19735152	0.02	Lus10024965	19729257	19735152	TM-CC				Lus10024965	32219	N	N	1	Lu9-19697038	TM-CC	Lus10024965
Lu10-723479	10	723479	777431	781117	4.52	Lus10031860	777431	781117	RLK				Lus10031860	53952	N	N	1	Lu10-723479	RLK	Lus10031860
Lu10-1529907	10	1529907	1554451	1554951	3.09	Lus10031702	1554451	1554951	RLK				Lus10031702	24544	N	N		Lu10-1529907	RLK	Lus10031702
Lu10-1529907	10	1529907	1550969	1553607	3.09	Lus10031703	1550969	1553607	RLK	Lu10-1552383	1552383	4.73	Lus10031703*	21062	N	Y	1	Lu10-1529907	RLK	Lus10031703*
Lu10-11682031	10	11682031	11673977	11677049	11.97	Lus10032761	11673977	11677049	RLK	Lu10-11674762	11674762	1.52	Lus10032761*	4982	N	Y	1	Lu10-11682031	RLK	Lus10032761*
Lu10-11682031	10	11682031	11656882	11659758	11.97	Lus10032759	11656882	11659758	CNL	Lu10-11656889	11656889	27.81	Lus10032759*	22273	N	Y		Lu10-11682031	CNL	Lus10032759*
Lu10-11695343	10	11695343	11673977	11677049	13.03	Lus10032761	11673977	11677049	RLK	Lu10-11674762	11674762	1.52	Lus10032761*	18294	N	Y	1	Lu10-11695343	RLK	Lus10032761*
Lu10-11695343	10	11695343	11656882	11659758	13.03	Lus10032759	11656882	11659758	CNL	Lu10-11656889	11656889	27.81	Lus10032759*	35585	N	Y		Lu10-11695343	CNL	Lus10032759*
Lu10-11715154	10	11715154	11673977	11677049	7.51	Lus10032761	11673977	11677049	RLK	Lu10-11674762	11674762	1.52	Lus10032761*	38105	N	Y	1	Lu10-11715154	RLK	Lus10032761*
Lu10-11715154	10	11715154	11656882	11659758	7.51	Lus10032759	11656882	11659758	CNL	Lu10-11656889	11656889	27.81	Lus10032759*	55396	N	Y		Lu10-11715154	CNL	Lus10032759*
Lu10-13464791	10	13464791	13473657	13475711	1.47	Lus10042678	13473657	13475711	RLK	Lu10-13475205	13475205	1.03	Lus10042678*	8866	N	Y	1	Lu10-13464791	RLK	Lus10042678*
Lu10-13464791	10	13464791	13476414	13478339	1.47	Lus10042679	13476414	13478339	RLK	Lu10-13477194	13477194	3.6	Lus10042679*	11623	N	Y		Lu10-13464791	RLK	Lus10042679*
Lu10-13703428	10	13703428	13695454	13699694	1.8	Lus10042714	13695454	13699694	TNL	Lu10-13698001	13698001	0.96	Lus10042714*	3734	N	Y	1	Lu10-13703428	TNL	Lus10042714*
Lu10-16094406	10	16094406	16154230	16157202	0.84	Lus10022900	16154230	16157202	CNL	Lu10-16154313	16154313	1.45	Lus10022900*	59824	N	Y	1	Lu10-16094406	CNL	Lus10022900*
Lu10-16129328	10	16129328	16154230	16157202	4.17	Lus10022900	16154230	16157202	CNL	Lu10-16154313	16154313	1.45	Lus10022900*	24902	N	Y	1	Lu10-16129328	CNL	Lus10022900*
Lu10-16137842	10	16137842	16154230	16157202	6.41	Lus10022900	16154230	16157202	CNL	Lu10-16154313	16154313	1.45	Lus10022900*	16388	N	Y	1	Lu10-16137842	CNL	Lus10022900*
Lu10-16605319	10	16605319	16618069	16621111	0.62	Lus10022808	16618069	16621111	TM-CC	Lu10-16618384	16618384	1.17	Lus10022808*	12750	N	Y	1	Lu10-16605319	TM-CC	Lus10022808*
Lu10-16605319	10	16605319	16697026	16699986	0.62	Lus10022792	16697026	16699986	CNL	Lu10-16699451	16699451	2.62	Lus10022792*	91707	N	Y		Lu10-16605319	CNL	Lus10022792*
Lu10-16759890	10	16759890	16697026	16699986	1.96	Lus10022792	16697026	16699986	CNL	Lu10-16699451	16699451	2.62	Lus10022792*	59904	N	Y	1	Lu10-16759890	CNL	Lus10022792*
Lu11-262510	11	262510	174231	177125	0.5	Lus10027353	174231	177125	TM-CC	Lu11-175679	175679	1.71	Lus10027353*	85385	N	Y	1	Lu11-262510	TM-CC	Lus10027353*
Lu11-262510	11	262510	169159	172623	0.5	Lus10027354	169159	172623	TM-CC	Lu11-172299	172299	1.02	Lus10027354*	89887	N	Y		Lu11-262510	TM-CC	Lus10027354*
Lu11-603845	11	603845	665690	667318	0.32	Lus10027230	665690	667318	RLK				Lus10027230	61845	N	N		Lu11-603845	RLK	Lus10027230
Lu11-603845	11	603845	634273	635683	0.32	Lus10027239	634273	635683	RLP	Lu11-635001	635001	0.94	Lus10027239*	30428	N	Y	1	Lu11-603845	RLP	Lus10027239*
Lu11-620390	11	620390	665690	667318	3.22	Lus10027230	665690	667318	RLK				Lus10027230	45300	N	N		Lu11-620390	RLK	Lus10027230
Lu11-620390	11	620390	634273	635683	3.22	Lus10027239	634273	635683	RLP	Lu11-635001	635001	0.94	Lus10027239*	13883	N	Y	1	Lu11-620390	RLP	Lus10027239*
Lu11-3025137	11	3025137	3065596	3070805	1.39	Lus10042023	3065596	3070805	TM-CC				Lus10042023	40459	N	N		Lu11-3025137	TM-CC	Lus10042023
Lu11-3025137	11	3025137	2950827	2951681	1.39	Lus10041991	2950827	2951681	RLK				Lus10041991	73456	N	N		Lu11-3025137	RLK	Lus10041991
Lu11-3025137	11	3025137	3057004	3059686	1.39	Lus10042020	3057004	3059686	TNL	Lu11-3059315	3059315	3.65	Lus10042020*	31867	N	Y	1	Lu11-3025137	TNL	Lus10042020*
Lu11-3025137	11	3025137	2951911	2953009	1.39	Lus10041992	2951911	2953009	RLK	Lu11-2952185	2952185	0.53	Lus10041992*	72128	N	Y		Lu11-3025137	RLK	Lus10041992*
Lu11-3026536	11	3026536	3065596	3070805	1.54	Lus10042023	3065596	3070805	TM-CC				Lus10042023	39060	N	N		Lu11-3026536	TM-CC	Lus10042023
Lu11-3026536	11	3026536	2950827	2951681	1.54	Lus10041991	2950827	2951681	RLK				Lus10041991	74855	N	N		Lu11-3026536	RLK	Lus10041991
Lu11-3026536	11	3026536	3057004	3059686	1.54	Lus10042020	3057004	3059686	TNL	Lu11-3059315	3059315	3.65	Lus10042020*	30468	N	Y	1	Lu11-3026536	TNL	Lus10042020*
Lu11-3026536	11	3026536	2951911	2953009	1.54	Lus10041992	2951911	2953009	RLK	Lu11-2952185	2952185	0.53	Lus10041992*	73527	N	Y		Lu11-3026536	RLK	Lus10041992*
Lu11-4814792	11	4814792	4900247	4901703	2.92	Lus10026208	4900247	4901703	RLP				Lus10026208	85455	N	N	1	Lu11-4814792	RLP	Lus10026208
Lu11-5325415	11	5325415	5356986	5357735	0.21	Lus10038212	5356986	5357735	RLK				Lus10038212	31571	N	N		Lu11-5325415	RLK	Lus10038212
Lu11-5325415	11	5325415	5231036	5234068	0.21	Lus10038174	5231036	5234068	RLK				Lus10038174	91347	N	N		Lu11-5325415	RLK	Lus10038174
Lu11-5325415	11	5325415	5399813	5400616	0.21	Lus10038227	5399813	5400616	RLK	Lu11-5400379	5400379	0.54	Lus10038227*	74398	N	Y	1	Lu11-5325415	RLK	Lus10038227*
Lu11-5688709	11	5688709	5687006	5687548	3.26	Lus10038298	5687006	5687548	DIR	Lu11-5687501	5687501	0.4	Lus10038298*	1161	N	Y	1	Lu11-5688709	DIR	Lus10038298*
Lu11-7032586	11	7032586	7044746	7047325	4.95	Lus10036608	7044746	7047325	RLK				Lus10036608	12160	N	N		Lu11-7032586	RLK	Lus10036608
Lu11-7032586	11	7032586	7008888	7010120	4.95	Lus10036616	7008888	7010120	TM-CC				Lus10036616	22466	N	N		Lu11-7032586	TM-CC	Lus10036616
Lu11-7032586	11	7032586	7005870	7008825	4.95	Lus10036617	7005870	7008825	TM-CC				Lus10036617	23761	N	N		Lu11-7032586	TM-CC	Lus10036617
Lu11-7032586	11	7032586	6974408	6975511	4.95	Lus10036624	6974408	6975511	WRKY	Lu11-6975307	6975307	4.1	Lus10036624*	57075	N	Y	1	Lu11-7032586	WRKY	Lus10036624*
Lu11-15914188	11	15914188	15865060	15871920	2.04	Lus10023612	15865060	15871920	TM-CC	Lu11-15866661	15866661	3.77	Lus10023612*	42268	N	Y	1	Lu11-15914188	TM-CC	Lus10023612*
Lu11-15914188	11	15914188	15848418	15850533	2.04	Lus10023615	15848418	15850533	WRKY	Lu11-15849102	15849102	5.18	Lus10023615*	63655	N	Y		Lu11-15914188	WRKY	Lus10023615*
Lu11-17188390	11	17188390	17129539	17131415	27.82	Lus10039295	17129539	17131415	WRKY				Lus10039295	56975	N	N		Lu11-17188390	WRKY	Lus10039295
Lu11-17188390	11	17188390	17096922	17098155	27.82	Lus10039304	17096922	17098155	TM-CC	Lu11-17097519	17097519	1.89	Lus10039304*	90235	N	Y	1	Lu11-17188390	TM-CC	Lus10039304*
Lu11-17188390	11	17188390	17096179	17096850	27.82	Lus10039305	17096179	17096850	TM-CC	Lu11-17096473	17096473	0.94	Lus10039305*	91540	N	Y		Lu11-17188390	TM-CC	Lus10039305*
Lu11-18699856	11	18699856	18696229	18699398	0.65	Lus10031230	18696229	18699398	RLK				Lus10031230	458	N	N		Lu11-18699856	RLK	Lus10031230
Lu11-18699856	11	18699856	18693790	18694870	0.65	Lus10031228	18693790	18694870	RLK				Lus10031228	4986	N	N		Lu11-18699856	RLK	Lus10031228
Lu11-18699856	11	18699856	18700928	18703536	0.65	Lus10031231	18700928	18703536	RLK	Lu11-18703358	18703358	1.14	Lus10031231*	1072	N	Y	1	Lu11-18699856	RLK	Lus10031231*
Lu11-18699856	11	18699856	18796297	18797480	0.65	Lus10031254	18796297	18797480	RLP	Lu11-18797294	18797294	0.12	Lus10031254*	96441	N	Y		Lu11-18699856	RLP	Lus10031254*
Lu11-18955548	11	18955548	19014401	19016992	0.32	Lus10031290	19014401	19016992	RLK				Lus10031290	58853	N	N	1	Lu11-18955548	RLK	Lus10031290
Lu12-720013	12	720013	799664	800605	2.61	Lus10006752	799664	800605	RLK				Lus10006752	79651	N	N		Lu12-720013	RLK	Lus10006752
Lu12-720013	12	720013	719787	720446	2.61	Lus10006772	719787	720446	RLK	Lu12-720013	720013	2.61	Lus10006772**	0	Y	Y	1	Lu12-720013	RLK	Lus10006772**
Lu12-720013	12	720013	819557	822893	2.61	Lus10006746	819557	822893	RLK	Lu12-820813	820813	1.22	Lus10006746*	99544	N	Y		Lu12-720013	RLK	Lus10006746*
Lu12-892762	12	892762	827780	831042	1.14	Lus10006745	827780	831042	RLK				Lus10006745	61720	N	N		Lu12-892762	RLK	Lus10006745
Lu12-892762	12	892762	799664	800605	1.14	Lus10006752	799664	800605	RLK				Lus10006752	92157	N	N		Lu12-892762	RLK	Lus10006752
Lu12-892762	12	892762	890823	894178	1.14	Lus10006732	890823	894178	TNL	Lu12-893958	893958	1.46	Lus10006732**	0	Y	Y	1	Lu12-892762	TNL	Lus10006732**
Lu12-892762	12	892762	920283	920975	1.14	Lus10006727	920283	920975	TM-CC	Lu12-920564	920564	1.44	Lus10006727*	27521	N	Y		Lu12-892762	TM-CC	Lus10006727*
Lu12-892762	12	892762	837969	842732	1.14	Lus10006742	837969	842732	RLK	Lu12-838006	838006	1.43	Lus10006742*	50030	N	Y		Lu12-892762	RLK	Lus10006742*
Lu12-892762	12	892762	819557	822893	1.14	Lus10006746	819557	822893	RLK	Lu12-820813	820813	1.22	Lus10006746*	69869	N	Y		Lu12-892762	RLK	Lus10006746*
Lu12-1350182	12	1350182	1369197	1373122	0.64	Lus10036251	1369197	1373122	RLK	Lu12-1371434	1371434	4.02	Lus10036251*	19015	N	Y	1	Lu12-1350182	RLK	Lus10036251*
Lu12-1350182	12	1350182	1319984	1324083	0.64	Lus10036242	1319984	1324083	RLK	Lu12-1323384	1323384	8.82	Lus10036242*	26099	N	Y		Lu12-1350182	RLK	Lus10036242*
Lu12-1353163	12	1353163	1369197	1373122	0.07	Lus10036251	1369197	1373122	RLK	Lu12-1371434	1371434	4.02	Lus10036251*	16034	N	Y	1	Lu12-1353163	RLK	Lus10036251*
Lu12-1353163	12	1353163	1319984	1324083	0.07	Lus10036242	1319984	1324083	RLK	Lu12-1323384	1323384	8.82	Lus10036242*	29080	N	Y		Lu12-1353163	RLK	Lus10036242*
Lu12-1884050	12	1884050	1851546	1852296	3.32	Lus10023335	1851546	1852296	RLK				Lus10023335	31754	N	N		Lu12-1884050	RLK	Lus10023335
Lu12-1884050	12	1884050	1873149	1874696	3.32	Lus10023329	1873149	1874696	TNL	Lu12-1874446	1874446	4.16	Lus10023329*	9354	N	Y	1	Lu12-1884050	TNL	Lus10023329*
Lu12-1884050	12	1884050	1893862	1897997	3.32	Lus10023323	1893862	1897997	RLK	Lu12-1896717	1896717	1.66	Lus10023323*	9812	N	Y		Lu12-1884050	RLK	Lus10023323*
Lu12-1884050	12	1884050	1872009	1872841	3.32	Lus10023330	1872009	1872841	TNL	Lu12-1872463	1872463	2.13	Lus10023330*	11209	N	Y		Lu12-1884050	TNL	Lus10023330*
Lu12-1884050	12	1884050	1833679	1837008	3.32	Lus10023339	1833679	1837008	RLK	Lu12-1834066	1834066	5.88	Lus10023339*	47042	N	Y		Lu12-1884050	RLK	Lus10023339*
Lu12-1896717	12	1896717	1851546	1852296	1.66	Lus10023335	1851546	1852296	RLK				Lus10023335	44421	N	N		Lu12-1896717	RLK	Lus10023335
Lu12-1896717	12	1896717	1893862	1897997	1.66	Lus10023323	1893862	1897997	RLK	Lu12-1896717	1896717	1.66	Lus10023323**	0	Y	Y	1	Lu12-1896717	RLK	Lus10023323**
Lu12-1896717	12	1896717	1873149	1874696	1.66	Lus10023329	1873149	1874696	TNL	Lu12-1874446	1874446	4.16	Lus10023329*	22021	N	Y		Lu12-1896717	TNL	Lus10023329*
Lu12-1896717	12	1896717	1872009	1872841	1.66	Lus10023330	1872009	1872841	TNL	Lu12-1872463	1872463	2.13	Lus10023330*	23876	N	Y		Lu12-1896717	TNL	Lus10023330*
Lu12-1896717	12	1896717	1833679	1837008	1.66	Lus10023339	1833679	1837008	RLK	Lu12-1834066	1834066	5.88	Lus10023339*	59709	N	Y		Lu12-1896717	RLK	Lus10023339*
Lu12-2366081	12	2366081	2345190	2348295	5.33	Lus10023220	2345190	2348295	RLK	Lu12-2345234	2345234	0.34	Lus10023220*	17786	N	Y	1	Lu12-2366081	RLK	Lus10023220*
Lu12-2667998	12	2667998	2735614	2737721	0.23	Lus10006964	2735614	2737721	RLK	Lu12-2736386	2736386	0.82	Lus10006964*	67616	N	Y	1	Lu12-2667998	RLK	Lus10006964*
Lu12-3128428	12	3128428	3133318	3136716	2.14	Lus10015277	3133318	3136716	RLK	Lu12-3136549	3136549	3.44	Lus10015277*	4890	N	Y	1	Lu12-3128428	RLK	Lus10015277*
Lu12-5085475	12	5085475	5110353	5112941	2	Lus10018289	5110353	5112941	TM-CC	Lu12-5111993	5111993	2.03	Lus10018289*	24878	N	Y	1	Lu12-5085475	TM-CC	Lus10018289*
Lu12-5111993	12	5111993	5211092	5214488	2.03	Lus10018308	5211092	5214488	TNL				Lus10018308	99099	N	N		Lu12-5111993	TNL	Lus10018308
Lu12-5111993	12	5111993	5110353	5112941	2.03	Lus10018289	5110353	5112941	TM-CC	Lu12-5111993	5111993	2.03	Lus10018289**	0	Y	Y	1	Lu12-5111993	TM-CC	Lus10018289**
Lu12-16614785	12	16614785	16524164	16526279	2.65	Lus10027878	16524164	16526279	RLP				Lus10027878	88506	N	N		Lu12-16614785	RLP	Lus10027878
Lu12-16614785	12	16614785	16614431	16619009	2.65	Lus10027903	16614431	16619009	RLP	Lu12-16617135	16617135	20.28	Lus10027903**	0	Y	Y	1	Lu12-16614785	RLP	Lus10027903**
Lu12-18491384	12	18491384	18562139	18564322	4.83	Lus10034108	18562139	18564322	RLK				Lus10034108	70755	N	N	1	Lu12-18491384	RLK	Lus10034108
Lu12-18513438	12	18513438	18562139	18564322	1.54	Lus10034108	18562139	18564322	RLK				Lus10034108	48701	N	N	1	Lu12-18513438	RLK	Lus10034108
Lu12-18665793	12	18665793	18723654	18726224	3.83	Lus10003072	18723654	18726224	RLK				Lus10003072	57861	N	N		Lu12-18665793	RLK	Lus10003072
Lu12-18665793	12	18665793	18723348	18723653	3.83	Lus10003071	18723348	18723653	RLK	Lu12-18723584	18723584	5.61	Lus10003071*	57555	N	Y	1	Lu12-18665793	RLK	Lus10003071*
Lu12-19127670	12	19127670	19122119	19129113	1.35	Lus10033608	19122119	19129113	RLK	Lu12-19128607	19128607	2.78	Lus10033608**	0	Y	Y	1	Lu12-19127670	RLK	Lus10033608**
Lu12-19651913	12	19651913	19698875	19699270	0.05	Lus10031605	19698875	19699270	RLK				Lus10031605	46962	N	N		Lu12-19651913	RLK	Lus10031605
Lu12-19651913	12	19651913	19706543	19707946	0.05	Lus10031602	19706543	19707946	RLK				Lus10031602	54630	N	N		Lu12-19651913	RLK	Lus10031602
Lu12-19651913	12	19651913	19745794	19749828	0.05	Lus10031592	19745794	19749828	RLK				Lus10031592	93881	N	N		Lu12-19651913	RLK	Lus10031592
Lu12-19651913	12	19651913	19703176	19705988	0.05	Lus10031603	19703176	19705988	RLK	Lu12-19703470	19703470	4.09	Lus10031603*	51263	N	Y	1	Lu12-19651913	RLK	Lus10031603*
Lu12-19651913	12	19651913	19708556	19709680	0.05	Lus10031601	19708556	19709680	RLP	Lu12-19709330	19709330	3.89	Lus10031601*	56643	N	Y		Lu12-19651913	RLP	Lus10031601*
Lu12-19651913	12	19651913	19725356	19727904	0.05	Lus10031596	19725356	19727904	RLK	Lu12-19727053	19727053	4.12	Lus10031596*	73443	N	Y		Lu12-19651913	RLK	Lus10031596*
Lu13-331509	13	331509	313767	314614	3.78	Lus10000744	313767	314614	TNL				Lus10000744	16895	N	N	1	Lu13-331509	TNL	Lus10000744
Lu13-348196	13	348196	313767	314614	4.79	Lus10000744	313767	314614	TNL				Lus10000744	33582	N	N	1	Lu13-348196	TNL	Lus10000744
Lu13-357119	13	357119	313767	314614	8.88	Lus10000744	313767	314614	TNL				Lus10000744	42505	N	N	1	Lu13-357119	TNL	Lus10000744
Lu13-1749576	13	1749576	1747160	1750173	1.23	Lus10001336	1747160	1750173	MLO	Lu13-1749576	1749576	1.23	Lus10001336**	0	Y	Y	1	Lu13-1749576	MLO	Lus10001336**
Lu13-2038032	13	2038032	2107200	2109308	0.59	Lus10026993	2107200	2109308	RLP				Lus10026993	69168	N	N		Lu13-2038032	RLP	Lus10026993
Lu13-2038032	13	2038032	2109984	2112573	0.59	Lus10026992	2109984	2112573	TM-CC				Lus10026992	71952	N	N		Lu13-2038032	TM-CC	Lus10026992
Lu13-2038032	13	2038032	1944672	1945903	0.59	Lus10026845	1944672	1945903	TNL				Lus10026845	92129	N	N		Lu13-2038032	TNL	Lus10026845
Lu13-2038032	13	2038032	1981440	1985178	0.59	Lus10026838	1981440	1985178	WRKY	Lu13-1981601	1981601	0.67	Lus10026838*	52854	N	Y	1	Lu13-2038032	WRKY	Lus10026838*
Lu13-2630454	13	2630454	2695609	2696436	13.26	Lus10026894	2695609	2696436	RLK	Lu13-2695753	2695753	10.65	Lus10026894*	65155	N	Y	1	Lu13-2630454	RLK	Lus10026894*
Lu13-2803036	13	2803036	2873870	2876374	0.81	Lus10001034	2873870	2876374	RLP	Lu13-2875561	2875561	1.29	Lus10001034*	70834	N	Y	1	Lu13-2803036	RLP	Lus10001034*
Lu13-2803036	13	2803036	2877002	2882692	0.81	Lus10001035	2877002	2882692	RLP	Lu13-2880924	2880924	15.3	Lus10001035*	73966	N	Y		Lu13-2803036	RLP	Lus10001035*
Lu13-2996936	13	2996936	3001560	3004717	1.06	Lus10025943	3001560	3004717	RLK	Lu13-3002781	3002781	4.95	Lus10025943*	4624	N	Y	1	Lu13-2996936	RLK	Lus10025943*
Lu13-2996936	13	2996936	2914341	2915277	1.06	Lus10001040	2914341	2915277	TNL	Lu13-2915089	2915089	1.72	Lus10001040*	81659	N	Y		Lu13-2996936	TNL	Lus10001040*
Lu13-2996936	13	2996936	2911982	2914272	1.06	Lus10001039	2911982	2914272	TNL	Lu13-2913335	2913335	2.01	Lus10001039*	82664	N	Y		Lu13-2996936	TNL	Lus10001039*
Lu13-2996936	13	2996936	2910946	2911827	1.06	Lus10001038	2910946	2911827	TNL	Lu13-2911439	2911439	0.56	Lus10001038*	85109	N	Y		Lu13-2996936	TNL	Lus10001038*
Lu13-3523564	13	3523564	3605340	3606813	5.79	Lus10026082	3605340	3606813	WRKY	Lu13-3606149	3606149	6.09	Lus10026082*	81776	N	Y	1	Lu13-3523564	WRKY	Lus10026082*
Lu13-3599975	13	3599975	3605340	3606813	0.54	Lus10026082	3605340	3606813	WRKY	Lu13-3606149	3606149	6.09	Lus10026082*	5365	N	Y	1	Lu13-3599975	WRKY	Lus10026082*
Lu13-4048698	13	4048698	4064480	4065781	12.66	Lus10002736	4064480	4065781	CNL				Lus10002736	15782	N	N	1	Lu13-4048698	CNL	Lus10002736
Lu13-4048698	13	4048698	4066720	4068303	12.66	Lus10002737	4066720	4068303	CNL				Lus10002737	18022	N	N		Lu13-4048698	CNL	Lus10002737
Lu13-4048698	13	4048698	4086952	4089951	12.66	Lus10002743	4086952	4089951	RLP				Lus10002743	38254	N	N		Lu13-4048698	RLP	Lus10002743
Lu13-4048698	13	4048698	3997321	3997740	12.66	Lus10026169	3997321	3997740	RLK				Lus10026169	50958	N	N		Lu13-4048698	RLK	Lus10026169
Lu13-4048698	13	4048698	4141596	4143026	12.66	Lus10002754	4141596	4143026	RLP				Lus10002754	92898	N	N		Lu13-4048698	RLP	Lus10002754
Lu13-4048698	13	4048698	4144251	4147241	12.66	Lus10002755	4144251	4147241	RLP				Lus10002755	95553	N	N		Lu13-4048698	RLP	Lus10002755
Lu13-4048698	13	4048698	4136784	4140702	12.66	Lus10002753	4136784	4140702	RLP	Lu13-4137156	4137156	1.31	Lus10002753*	88086	N	Y		Lu13-4048698	RLP	Lus10002753*
Lu13-4136428	13	4136428	4141596	4143026	1.44	Lus10002754	4141596	4143026	RLP				Lus10002754	5168	N	N		Lu13-4136428	RLP	Lus10002754
Lu13-4136428	13	4136428	4144251	4147241	1.44	Lus10002755	4144251	4147241	RLP				Lus10002755	7823	N	N		Lu13-4136428	RLP	Lus10002755
Lu13-4136428	13	4136428	4155858	4156274	1.44	Lus10002757	4155858	4156274	RLP				Lus10002757	19430	N	N		Lu13-4136428	RLP	Lus10002757
Lu13-4136428	13	4136428	4156861	4159803	1.44	Lus10002758	4156861	4159803	RLP				Lus10002758	20433	N	N		Lu13-4136428	RLP	Lus10002758
Lu13-4136428	13	4136428	4086952	4089951	1.44	Lus10002743	4086952	4089951	RLP				Lus10002743	46477	N	N		Lu13-4136428	RLP	Lus10002743
Lu13-4136428	13	4136428	4066720	4068303	1.44	Lus10002737	4066720	4068303	CNL				Lus10002737	68125	N	N		Lu13-4136428	CNL	Lus10002737
Lu13-4136428	13	4136428	4064480	4065781	1.44	Lus10002736	4064480	4065781	CNL				Lus10002736	70647	N	N		Lu13-4136428	CNL	Lus10002736
Lu13-4136428	13	4136428	4136784	4140702	1.44	Lus10002753	4136784	4140702	RLP	Lu13-4137156	4137156	1.31	Lus10002753*	356	N	Y	1	Lu13-4136428	RLP	Lus10002753*
Lu13-4432608	13	4432608	4448610	4451882	3.97	Lus10019722	4448610	4451882	RLK				Lus10019722	16002	N	N	1	Lu13-4432608	RLK	Lus10019722
Lu13-4432608	13	4432608	4520377	4539065	3.97	Lus10019708	4520377	4539065	TNL	Lu13-4531489	4531489	14.08	Lus10019708*	87769	N	Y		Lu13-4432608	TNL	Lus10019708*
Lu13-4531367	13	4531367	4448610	4451882	13.41	Lus10019722	4448610	4451882	RLK				Lus10019722	79485	N	N		Lu13-4531367	RLK	Lus10019722
Lu13-4531367	13	4531367	4520377	4539065	13.41	Lus10019708	4520377	4539065	TNL	Lu13-4531489	4531489	14.08	Lus10019708**	0	Y	Y	1	Lu13-4531367	TNL	Lus10019708**
Lu13-4590208	13	4590208	4520377	4539065	2.99	Lus10019708	4520377	4539065	TNL	Lu13-4531489	4531489	14.08	Lus10019708*	51143	N	Y	1	Lu13-4590208	TNL	Lus10019708*
Lu13-4791823	13	4791823	4813804	4814638	13.79	Lus10000835	4813804	4814638	RPW8				Lus10000835	21981	N	N	1	Lu13-4791823	RPW8	Lus10000835
Lu13-4791823	13	4791823	4816848	4818268	13.79	Lus10000836	4816848	4818268	RPW8				Lus10000836	25025	N	N		Lu13-4791823	RPW8	Lus10000836
Lu13-4791823	13	4791823	4871884	4875204	13.79	Lus10009328	4871884	4875204	RPW8				Lus10009328	80061	N	N		Lu13-4791823	RPW8	Lus10009328
Lu13-4830850	13	4830850	4816848	4818268	7.17	Lus10000836	4816848	4818268	RPW8				Lus10000836	12582	N	N	1	Lu13-4830850	RPW8	Lus10000836
Lu13-4830850	13	4830850	4813804	4814638	7.17	Lus10000835	4813804	4814638	RPW8				Lus10000835	16212	N	N		Lu13-4830850	RPW8	Lus10000835
Lu13-4830850	13	4830850	4871884	4875204	7.17	Lus10009328	4871884	4875204	RPW8				Lus10009328	41034	N	N		Lu13-4830850	RPW8	Lus10009328
Lu13-4866704	13	4866704	4871884	4875204	12.24	Lus10009328	4871884	4875204	RPW8				Lus10009328	5180	N	N	1	Lu13-4866704	RPW8	Lus10009328
Lu13-4866704	13	4866704	4816848	4818268	12.24	Lus10000836	4816848	4818268	RPW8				Lus10000836	48436	N	N		Lu13-4866704	RPW8	Lus10000836
Lu13-4866704	13	4866704	4813804	4814638	12.24	Lus10000835	4813804	4814638	RPW8				Lus10000835	52066	N	N		Lu13-4866704	RPW8	Lus10000835
Lu13-4866704	13	4866704	4940816	4945877	12.24	Lus10009339	4940816	4945877	RLK	Lu13-4943266	4943266	6.65	Lus10009339*	74112	N	Y		Lu13-4866704	RLK	Lus10009339*
Lu13-4900476	13	4900476	4871884	4875204	10.9	Lus10009328	4871884	4875204	RPW8				Lus10009328	25272	N	N		Lu13-4900476	RPW8	Lus10009328
Lu13-4900476	13	4900476	4816848	4818268	10.9	Lus10000836	4816848	4818268	RPW8				Lus10000836	82208	N	N		Lu13-4900476	RPW8	Lus10000836
Lu13-4900476	13	4900476	4813804	4814638	10.9	Lus10000835	4813804	4814638	RPW8				Lus10000835	85838	N	N		Lu13-4900476	RPW8	Lus10000835
Lu13-4900476	13	4900476	4940816	4945877	10.9	Lus10009339	4940816	4945877	RLK	Lu13-4943266	4943266	6.65	Lus10009339*	40340	N	Y	1	Lu13-4900476	RLK	Lus10009339*
Lu13-5102696	13	5102696	5141681	5142476	7.14	Lus10009364	5141681	5142476	RLK	Lu13-5142240	5142240	8.14	Lus10009364*	38985	N	Y	1	Lu13-5102696	RLK	Lus10009364*
Lu13-5116313	13	5116313	5141681	5142476	8.33	Lus10009364	5141681	5142476	RLK	Lu13-5142240	5142240	8.14	Lus10009364*	25368	N	Y	1	Lu13-5116313	RLK	Lus10009364*
Lu13-5142458	13	5142458	5141681	5142476	3.32	Lus10009364	5141681	5142476	RLK	Lu13-5142240	5142240	8.14	Lus10009364**	0	Y	Y	1	Lu13-5142458	RLK	Lus10009364**
Lu13-5667491	13	5667491	5675880	5676698	2.29	Lus10011577	5675880	5676698	RLK				Lus10011577	8389	N	N		Lu13-5667491	RLK	Lus10011577
Lu13-5667491	13	5667491	5672600	5675656	2.29	Lus10011576	5672600	5675656	RLK	Lu13-5675000	5675000	3.53	Lus10011576*	5109	N	Y	1	Lu13-5667491	RLK	Lus10011576*
Lu13-6229154	13	6229154	6213590	6214996	1.19	Lus10006794	6213590	6214996	CNL				Lus10006794	14158	N	N		Lu13-6229154	CNL	Lus10006794
Lu13-6229154	13	6229154	6215024	6217123	1.19	Lus10006793	6215024	6217123	CNL	Lu13-6216789	6216789	0.5	Lus10006793*	12031	N	Y	1	Lu13-6229154	CNL	Lus10006793*
Lu13-6229154	13	6229154	6251251	6254906	1.19	Lus10006789	6251251	6254906	TNL	Lu13-6253554	6253554	2.1	Lus10006789*	22097	N	Y		Lu13-6229154	TNL	Lus10006789*
Lu13-14551753	13	14551753	14643104	14643559	4.48	Lus10034711	14643104	14643559	RLK				Lus10034711	91351	N	N		Lu13-14551753	RLK	Lus10034711
Lu13-14551753	13	14551753	14567316	14570767	4.48	Lus10034697	14567316	14570767	TNL	Lu13-14569216	14569216	1.15	Lus10034697*	15563	N	Y	1	Lu13-14551753	TNL	Lus10034697*
Lu13-14603346	13	14603346	14643104	14643559	2.75	Lus10034711	14643104	14643559	RLK				Lus10034711	39758	N	N		Lu13-14603346	RLK	Lus10034711
Lu13-14603346	13	14603346	14567316	14570767	2.75	Lus10034697	14567316	14570767	TNL	Lu13-14569216	14569216	1.15	Lus10034697*	32579	N	Y	1	Lu13-14603346	TNL	Lus10034697*
Lu13-16452573	13	16452573	16548757	16551846	2.87	Lus10032162	16548757	16551846	RLK	Lu13-16549646	16549646	0.46	Lus10032162*	96184	N	Y	1	Lu13-16452573	RLK	Lus10032162*
Lu13-17247218	13	17247218	17222805	17224022	2.32	Lus10025578	17222805	17224022	RLP	Lu13-17223031	17223031	14.62	Lus10025578*	23196	N	Y	1	Lu13-17247218	RLP	Lus10025578*
Lu13-18212664	13	18212664	18177651	18182041	2.64	Lus10030839	18177651	18182041	TNL				Lus10030839	30623	N	N		Lu13-18212664	TNL	Lus10030839
Lu13-18212664	13	18212664	18211794	18215062	2.64	Lus10030845	18211794	18215062	RLK	Lu13-18212297	18212297	4.89	Lus10030845**	0	Y	Y	1	Lu13-18212664	RLK	Lus10030845**
Lu13-18212664	13	18212664	18218174	18221600	2.64	Lus10030846	18218174	18221600	RLK	Lu13-18220744	18220744	4.95	Lus10030846*	5510	N	Y		Lu13-18212664	RLK	Lus10030846*
Lu13-18212664	13	18212664	18222200	18225706	2.64	Lus10030847	18222200	18225706	RLK	Lu13-18225603	18225603	4.2	Lus10030847*	9536	N	Y		Lu13-18212664	RLK	Lus10030847*
Lu13-18212664	13	18212664	18251116	18254564	2.64	Lus10030851	18251116	18254564	RLK	Lu13-18254083	18254083	0.87	Lus10030851*	38452	N	Y		Lu13-18212664	RLK	Lus10030851*
Lu13-18212664	13	18212664	18256874	18259161	2.64	Lus10030852	18256874	18259161	RLK	Lu13-18256943	18256943	2.56	Lus10030852*	44210	N	Y		Lu13-18212664	RLK	Lus10030852*
Lu13-18212664	13	18212664	18273840	18276900	2.64	Lus10030854	18273840	18276900	RLK	Lu13-18273914	18273914	9.17	Lus10030854*	61176	N	Y		Lu13-18212664	RLK	Lus10030854*
Lu13-18212664	13	18212664	18277829	18280950	2.64	Lus10030855	18277829	18280950	RLK	Lu13-18280852	18280852	5.09	Lus10030855*	65165	N	Y		Lu13-18212664	RLK	Lus10030855*
Lu13-18212664	13	18212664	18281785	18285734	2.64	Lus10030856	18281785	18285734	RLK	Lu13-18284139	18284139	5.48	Lus10030856*	69121	N	Y		Lu13-18212664	RLK	Lus10030856*
Lu13-18313086	13	18313086	18281785	18285734	1.9	Lus10030856	18281785	18285734	RLK	Lu13-18284139	18284139	5.48	Lus10030856*	27352	N	Y	1	Lu13-18313086	RLK	Lus10030856*
Lu13-18313086	13	18313086	18277829	18280950	1.9	Lus10030855	18277829	18280950	RLK	Lu13-18280852	18280852	5.09	Lus10030855*	32136	N	Y		Lu13-18313086	RLK	Lus10030855*
Lu13-18313086	13	18313086	18273840	18276900	1.9	Lus10030854	18273840	18276900	RLK	Lu13-18273914	18273914	9.17	Lus10030854*	36186	N	Y		Lu13-18313086	RLK	Lus10030854*
Lu13-18313086	13	18313086	18256874	18259161	1.9	Lus10030852	18256874	18259161	RLK	Lu13-18256943	18256943	2.56	Lus10030852*	53925	N	Y		Lu13-18313086	RLK	Lus10030852*
Lu13-18313086	13	18313086	18251116	18254564	1.9	Lus10030851	18251116	18254564	RLK	Lu13-18254083	18254083	0.87	Lus10030851*	58522	N	Y		Lu13-18313086	RLK	Lus10030851*
Lu13-18313086	13	18313086	18222200	18225706	1.9	Lus10030847	18222200	18225706	RLK	Lu13-18225603	18225603	4.2	Lus10030847*	87380	N	Y		Lu13-18313086	RLK	Lus10030847*
Lu13-18313086	13	18313086	18218174	18221600	1.9	Lus10030846	18218174	18221600	RLK	Lu13-18220744	18220744	4.95	Lus10030846*	91486	N	Y		Lu13-18313086	RLK	Lus10030846*
Lu13-18313086	13	18313086	18211794	18215062	1.9	Lus10030845	18211794	18215062	RLK	Lu13-18212297	18212297	4.89	Lus10030845*	98024	N	Y		Lu13-18313086	RLK	Lus10030845*
Lu13-19354498	13	19354498	19445767	19447677	1.51	Lus10026651	19445767	19447677	RLP				Lus10026651	91269	N	N		Lu13-19354498	RLP	Lus10026651
Lu13-19354498	13	19354498	19358334	19360266	1.51	Lus10030424	19358334	19360266	WRKY	Lu13-19359071	19359071	1.05	Lus10030424*	3836	N	Y	1	Lu13-19354498	WRKY	Lus10030424*
Lu14-415594	14	415594	457234	460472	4.72	Lus10009429	457234	460472	RLK				Lus10009429	41640	N	N	1	Lu14-415594	RLK	Lus10009429
Lu14-1171479	14	1171479	1171345	1174215	10.89	Lus10028639	1171345	1174215	CNL	Lu14-1171479	1171479	10.89	Lus10028639**	0	Y	Y	1	Lu14-1171479	CNL	Lus10028639**
Lu14-1254821	14	1254821	1171345	1174215	9.79	Lus10028639	1171345	1174215	CNL	Lu14-1171479	1171479	10.89	Lus10028639*	80606	N	Y	1	Lu14-1254821	CNL	Lus10028639*
Lu14-2160157	14	2160157	2222430	2225632	0.9	Lus10025541	2222430	2225632	RLK				Lus10025541	62273	N	N	1	Lu14-2160157	RLK	Lus10025541
Lu14-2160157	14	2160157	2230403	2232708	0.9	Lus10025544	2230403	2232708	RLK	Lu14-2232228	2232228	0.25	Lus10025544*	70246	N	Y		Lu14-2160157	RLK	Lus10025544*
Lu14-2160157	14	2160157	2235555	2236556	0.9	Lus10025545	2235555	2236556	RLK	Lu14-2236395	2236395	3.66	Lus10025545*	75398	N	Y		Lu14-2160157	RLK	Lus10025545*
Lu14-2216515	14	2216515	2222430	2225632	4.87	Lus10025541	2222430	2225632	RLK				Lus10025541	5915	N	N		Lu14-2216515	RLK	Lus10025541
Lu14-2216515	14	2216515	2230403	2232708	4.87	Lus10025544	2230403	2232708	RLK	Lu14-2232228	2232228	0.25	Lus10025544*	13888	N	Y	1	Lu14-2216515	RLK	Lus10025544*
Lu14-2216515	14	2216515	2235555	2236556	4.87	Lus10025545	2235555	2236556	RLK	Lu14-2236395	2236395	3.66	Lus10025545*	19040	N	Y		Lu14-2216515	RLK	Lus10025545*
Lu14-2220099	14	2220099	2222430	2225632	6.89	Lus10025541	2222430	2225632	RLK				Lus10025541	2331	N	N		Lu14-2220099	RLK	Lus10025541
Lu14-2220099	14	2220099	2230403	2232708	6.89	Lus10025544	2230403	2232708	RLK	Lu14-2232228	2232228	0.25	Lus10025544*	10304	N	Y	1	Lu14-2220099	RLK	Lus10025544*
Lu14-2220099	14	2220099	2235555	2236556	6.89	Lus10025545	2235555	2236556	RLK	Lu14-2236395	2236395	3.66	Lus10025545*	15456	N	Y		Lu14-2220099	RLK	Lus10025545*
Lu14-2650923	14	2650923	2629331	2632518	6.85	Lus10013342	2629331	2632518	RLK				Lus10013342	18405	N	N	1	Lu14-2650923	RLK	Lus10013342
Lu14-3401075	14	3401075	3375494	3376985	0.43	Lus10020546	3375494	3376985	RLK				Lus10020546	24090	N	N	1	Lu14-3401075	RLK	Lus10020546
Lu14-3401075	14	3401075	3341499	3348692	0.43	Lus10020550	3341499	3348692	RLK	Lu14-3348314	3348314	12.87	Lus10020550*	52383	N	Y		Lu14-3401075	RLK	Lus10020550*
Lu14-3401075	14	3401075	3457175	3462957	0.43	Lus10020534	3457175	3462957	TNL	Lu14-3458382	3458382	7.47	Lus10020534*	56100	N	Y		Lu14-3401075	TNL	Lus10020534*
Lu14-3433849	14	3433849	3375494	3376985	5.97	Lus10020546	3375494	3376985	RLK				Lus10020546	56864	N	N		Lu14-3433849	RLK	Lus10020546
Lu14-3433849	14	3433849	3457175	3462957	5.97	Lus10020534	3457175	3462957	TNL	Lu14-3458382	3458382	7.47	Lus10020534*	23326	N	Y	1	Lu14-3433849	TNL	Lus10020534*
Lu14-3433849	14	3433849	3504202	3505209	5.97	Lus10020525	3504202	3505209	TNL	Lu14-3504227	3504227	8.58	Lus10020525*	70353	N	Y		Lu14-3433849	TNL	Lus10020525*
Lu14-3433849	14	3433849	3341499	3348692	5.97	Lus10020550	3341499	3348692	RLK	Lu14-3348314	3348314	12.87	Lus10020550*	85157	N	Y		Lu14-3433849	RLK	Lus10020550*
Lu14-3458382	14	3458382	3375494	3376985	7.47	Lus10020546	3375494	3376985	RLK				Lus10020546	81397	N	N		Lu14-3458382	RLK	Lus10020546
Lu14-3458382	14	3458382	3457175	3462957	7.47	Lus10020534	3457175	3462957	TNL	Lu14-3458382	3458382	7.47	Lus10020534**	0	Y	Y	1	Lu14-3458382	TNL	Lus10020534**
Lu14-3458382	14	3458382	3504202	3505209	7.47	Lus10020525	3504202	3505209	TNL	Lu14-3504227	3504227	8.58	Lus10020525*	45820	N	Y		Lu14-3458382	TNL	Lus10020525*
Lu14-3511703	14	3511703	3504202	3505209	2.89	Lus10020525	3504202	3505209	TNL	Lu14-3504227	3504227	8.58	Lus10020525*	6494	N	Y	1	Lu14-3511703	TNL	Lus10020525*
Lu14-3511703	14	3511703	3457175	3462957	2.89	Lus10020534	3457175	3462957	TNL	Lu14-3458382	3458382	7.47	Lus10020534*	48746	N	Y		Lu14-3511703	TNL	Lus10020534*
Lu14-3549845	14	3549845	3504202	3505209	9.76	Lus10020525	3504202	3505209	TNL	Lu14-3504227	3504227	8.58	Lus10020525*	44636	N	Y	1	Lu14-3549845	TNL	Lus10020525*
Lu14-3549845	14	3549845	3457175	3462957	9.76	Lus10020534	3457175	3462957	TNL	Lu14-3458382	3458382	7.47	Lus10020534*	86888	N	Y		Lu14-3549845	TNL	Lus10020534*
Lu14-3600594	14	3600594	3504202	3505209	0.94	Lus10020525	3504202	3505209	TNL	Lu14-3504227	3504227	8.58	Lus10020525*	95385	N	Y	1	Lu14-3600594	TNL	Lus10020525*
Lu14-4021471	14	4021471	3966552	3970345	1.58	Lus10021440	3966552	3970345	TM-CC				Lus10021440	51126	N	N		Lu14-4021471	TM-CC	Lus10021440
Lu14-4021471	14	4021471	4018836	4024903	1.58	Lus10021448	4018836	4024903	TM-CC	Lu14-4024783	4024783	3.75	Lus10021448**	0	Y	Y	1	Lu14-4021471	TM-CC	Lus10021448**
Lu14-4798201	14	4798201	4807215	4810409	0.22	Lus10012508	4807215	4810409	RLK				Lus10012508	9014	N	N	1	Lu14-4798201	RLK	Lus10012508
Lu14-4976146	14	4976146	4957874	4960241	0.47	Lus10014235	4957874	4960241	RLK	Lu14-4960122	4960122	1	Lus10014235*	15905	N	Y	1	Lu14-4976146	RLK	Lus10014235*
Lu14-4976146	14	4976146	4954671	4957103	0.47	Lus10014236	4954671	4957103	RLK	Lu14-4955376	4955376	1.67	Lus10014236*	19043	N	Y		Lu14-4976146	RLK	Lus10014236*
Lu14-4976146	14	4976146	5061029	5065135	0.47	Lus10014207	5061029	5065135	TNL	Lu14-5061620	5061620	1.69	Lus10014207*	84883	N	Y		Lu14-4976146	TNL	Lus10014207*
Lu14-5213933	14	5213933	5183018	5185961	1.49	Lus10014174	5183018	5185961	RLK	Lu14-5185427	5185427	7.52	Lus10014174*	27972	N	Y	1	Lu14-5213933	RLK	Lus10014174*
Lu14-5213933	14	5213933	5170010	5171567	1.49	Lus10014177	5170010	5171567	WRKY	Lu14-5171178	5171178	3.28	Lus10014177*	42366	N	Y		Lu14-5213933	WRKY	Lus10014177*
Lu14-5213933	14	5213933	5145249	5147954	1.49	Lus10014185	5145249	5147954	RLK	Lu14-5147718	5147718	4.24	Lus10014185*	65979	N	Y		Lu14-5213933	RLK	Lus10014185*
Lu14-5243599	14	5243599	5183018	5185961	1.3	Lus10014174	5183018	5185961	RLK	Lu14-5185427	5185427	7.52	Lus10014174*	57638	N	Y	1	Lu14-5243599	RLK	Lus10014174*
Lu14-5243599	14	5243599	5170010	5171567	1.3	Lus10014177	5170010	5171567	WRKY	Lu14-5171178	5171178	3.28	Lus10014177*	72032	N	Y		Lu14-5243599	WRKY	Lus10014177*
Lu14-5243599	14	5243599	5145249	5147954	1.3	Lus10014185	5145249	5147954	RLK	Lu14-5147718	5147718	4.24	Lus10014185*	95645	N	Y		Lu14-5243599	RLK	Lus10014185*
Lu14-5382091	14	5382091	5375403	5382647	1.28	Lus10014150	5375403	5382647	RLK	Lu14-5376136	5376136	8.75	Lus10014150**	0	Y	Y	1	Lu14-5382091	RLK	Lus10014150**
Lu14-5476624	14	5476624	5496899	5497839	0.65	Lus10006848	5496899	5497839	WRKY	Lu14-5497801	5497801	7.02	Lus10006848*	20275	N	Y	1	Lu14-5476624	WRKY	Lus10006848*
Lu14-5476624	14	5476624	5375403	5382647	0.65	Lus10014150	5375403	5382647	RLK	Lu14-5376136	5376136	8.75	Lus10014150*	93977	N	Y		Lu14-5476624	RLK	Lus10014150*
Lu14-5959395	14	5959395	5960004	5963280	3.44	Lus10015649	5960004	5963280	TNL	Lu14-5963276	5963276	5.75	Lus10015649**	0	Y	Y	1	Lu14-5959395	TNL	Lus10015649**
Lu14-5959395	14	5959395	5955689	5959658	3.44	Lus10015648	5955689	5959658	TNL	Lu14-5958584	5958584	6.82	Lus10015648**	0	Y	Y		Lu14-5959395	TNL	Lus10015648**
Lu14-5959395	14	5959395	5963346	5966177	3.44	Lus10015650	5963346	5966177	TNL	Lu14-5963946	5963946	6.87	Lus10015650*	3951	N	Y		Lu14-5959395	TNL	Lus10015650*
Lu14-10551333	14	10551333	10547787	10552007	5.78	Lus10008320	10547787	10552007	TNL	Lu14-10551333	10551333	5.78	Lus10008320**	0	Y	Y	1	Lu14-10551333	TNL	Lus10008320**
Lu14-10551333	14	10551333	10530139	10530998	5.78	Lus10008318	10530139	10530998	TNL	Lu14-10530720	10530720	0.01	Lus10008318*	20335	N	Y		Lu14-10551333	TNL	Lus10008318*
Lu14-10551333	14	10551333	10617695	10618072	5.78	Lus10008333	10617695	10618072	RLK	Lu14-10618018	10618018	5.55	Lus10008333*	66362	N	Y		Lu14-10551333	RLK	Lus10008333*
Lu14-13224994	14	13224994	13232982	13235646	6.31	Lus10032887	13232982	13235646	WRKY	Lu14-13234115	13234115	2.6	Lus10032887*	7988	N	Y	1	Lu14-13224994	WRKY	Lus10032887*
Lu14-13226830	14	13226830	13232982	13235646	6.22	Lus10032887	13232982	13235646	WRKY	Lu14-13234115	13234115	2.6	Lus10032887*	6152	N	Y	1	Lu14-13226830	WRKY	Lus10032887*
Lu14-15360622	14	15360622	15357234	15366290	2.18	Lus10035674	15357234	15366290	TNL	Lu14-15363356	15363356	3.03	Lus10035674**	0	Y	Y	1	Lu14-15360622	TNL	Lus10035674**
Lu14-15360622	14	15360622	15284609	15287694	2.18	Lus10035687	15284609	15287694	RLK	Lu14-15287595	15287595	0.44	Lus10035687*	72928	N	Y		Lu14-15360622	RLK	Lus10035687*
Lu14-15588631	14	15588631	15659036	15664924	1.93	Lus10003244	15659036	15664924	RLK	Lu14-15660810	15660810	0.9	Lus10003244*	70405	N	Y	1	Lu14-15588631	RLK	Lus10003244*
Lu14-16548135	14	16548135	16539146	16544259	0.01	Lus10018027	16539146	16544259	TM-CC				Lus10018027	3876	N	N		Lu14-16548135	TM-CC	Lus10018027
Lu14-16548135	14	16548135	16552178	16554133	0.01	Lus10018024	16552178	16554133	TNL	Lu14-16554050	16554050	0.36	Lus10018024*	4043	N	Y	1	Lu14-16548135	TNL	Lus10018024*
Lu14-16548135	14	16548135	16554809	16555030	0.01	Lus10018023	16554809	16555030	TNL	Lu14-16554995	16554995	0.25	Lus10018023*	6674	N	Y		Lu14-16548135	TNL	Lus10018023*
Lu14-16548135	14	16548135	16558322	16562253	0.01	Lus10018021	16558322	16562253	TNL	Lu14-16561215	16561215	8.12	Lus10018021*	10187	N	Y		Lu14-16548135	TNL	Lus10018021*
Lu14-16744523	14	16744523	16826426	16828276	4.79	Lus10017963	16826426	16828276	RLK				Lus10017963	81903	N	N	1	Lu14-16744523	RLK	Lus10017963
Lu14-16744523	14	16744523	16656320	16658772	4.79	Lus10017996	16656320	16658772	RLK				Lus10017996	85751	N	N		Lu14-16744523	RLK	Lus10017996
Lu14-16887287	14	16887287	16826426	16828276	0.24	Lus10017963	16826426	16828276	RLK				Lus10017963	59011	N	N		Lu14-16887287	RLK	Lus10017963
Lu14-16887287	14	16887287	16863716	16866294	0.24	Lus10017953	16863716	16866294	RLK	Lu14-16865784	16865784	0.41	Lus10017953*	20993	N	Y	1	Lu14-16887287	RLK	Lus10017953*
Lu14-17203266	14	17203266	17203248	17203932	14.04	Lus10039211	17203248	17203932	TNL	Lu14-17203266	17203266	14.04	Lus10039211**	0	Y	Y	1	Lu14-17203266	TNL	Lus10039211**
Lu14-17203266	14	17203266	17153959	17158013	14.04	Lus10005588	17153959	17158013	TNL	Lu14-17157288	17157288	0.96	Lus10005588*	45253	N	Y		Lu14-17203266	TNL	Lus10005588*
Lu14-18839873	14	18839873	18754596	18758418	0.93	Lus10015007	18754596	18758418	TM-CC				Lus10015007	81455	N	N		Lu14-18839873	TM-CC	Lus10015007
Lu14-18839873	14	18839873	18803623	18807690	0.93	Lus10014996	18803623	18807690	RLK	Lu14-18804501	18804501	3.22	Lus10014996*	32183	N	Y	1	Lu14-18839873	RLK	Lus10014996*
Lu15-2178	15	2178	46613	47143	3.4	Lus10007609	46613	47143	RLK				Lus10007609	44435	N	N		Lu15-2178	RLK	Lus10007609
Lu15-2178	15	2178	11369	14331	3.4	Lus10007601	11369	14331	RLK	Lu15-12677	12677	7.78	Lus10007601*	9191	N	Y	1	Lu15-2178	RLK	Lus10007601*
Lu15-2178	15	2178	29008	31923	3.4	Lus10007604	29008	31923	RLK	Lu15-29018	29018	2.15	Lus10007604*	26830	N	Y		Lu15-2178	RLK	Lus10007604*
Lu15-2178	15	2178	43694	46128	3.4	Lus10007608	43694	46128	RLK	Lu15-44194	44194	10.88	Lus10007608*	41516	N	Y		Lu15-2178	RLK	Lus10007608*
Lu15-2178	15	2178	47907	50779	3.4	Lus10007610	47907	50779	RLK	Lu15-48946	48946	15.63	Lus10007610*	45729	N	Y		Lu15-2178	RLK	Lus10007610*
Lu15-2178	15	2178	51620	55118	3.4	Lus10007611	51620	55118	RLK	Lu15-53261	53261	16.61	Lus10007611*	49442	N	Y		Lu15-2178	RLK	Lus10007611*
Lu15-46304	15	46304	46613	47143	11.6	Lus10007609	46613	47143	RLK				Lus10007609	309	N	N		Lu15-46304	RLK	Lus10007609
Lu15-46304	15	46304	134861	137811	11.6	Lus10007631	134861	137811	RLK				Lus10007631	88557	N	N		Lu15-46304	RLK	Lus10007631
Lu15-46304	15	46304	43694	46128	11.6	Lus10007608	43694	46128	RLK	Lu15-44194	44194	10.88	Lus10007608*	176	N	Y	1	Lu15-46304	RLK	Lus10007608*
Lu15-46304	15	46304	47907	50779	11.6	Lus10007610	47907	50779	RLK	Lu15-48946	48946	15.63	Lus10007610*	1603	N	Y		Lu15-46304	RLK	Lus10007610*
Lu15-46304	15	46304	51620	55118	11.6	Lus10007611	51620	55118	RLK	Lu15-53261	53261	16.61	Lus10007611*	5316	N	Y		Lu15-46304	RLK	Lus10007611*
Lu15-46304	15	46304	29008	31923	11.6	Lus10007604	29008	31923	RLK	Lu15-29018	29018	2.15	Lus10007604*	14381	N	Y		Lu15-46304	RLK	Lus10007604*
Lu15-46304	15	46304	11369	14331	11.6	Lus10007601	11369	14331	RLK	Lu15-12677	12677	7.78	Lus10007601*	31973	N	Y		Lu15-46304	RLK	Lus10007601*
Lu15-46304	15	46304	138808	141347	11.6	Lus10007632	138808	141347	RLK	Lu15-139914	139914	9.75	Lus10007632*	92504	N	Y		Lu15-46304	RLK	Lus10007632*
Lu15-46304	15	46304	144985	147520	11.6	Lus10007633	144985	147520	RLK	Lu15-146830	146830	6.4	Lus10007633*	98681	N	Y		Lu15-46304	RLK	Lus10007633*
Lu15-50397	15	50397	46613	47143	9	Lus10007609	46613	47143	RLK				Lus10007609	3254	N	N		Lu15-50397	RLK	Lus10007609
Lu15-50397	15	50397	134861	137811	9	Lus10007631	134861	137811	RLK				Lus10007631	84464	N	N		Lu15-50397	RLK	Lus10007631
Lu15-50397	15	50397	47907	50779	9	Lus10007610	47907	50779	RLK	Lu15-48946	48946	15.63	Lus10007610**	0	Y	Y	1	Lu15-50397	RLK	Lus10007610**
Lu15-50397	15	50397	51620	55118	9	Lus10007611	51620	55118	RLK	Lu15-53261	53261	16.61	Lus10007611*	1223	N	Y		Lu15-50397	RLK	Lus10007611*
Lu15-50397	15	50397	43694	46128	9	Lus10007608	43694	46128	RLK	Lu15-44194	44194	10.88	Lus10007608*	4269	N	Y		Lu15-50397	RLK	Lus10007608*
Lu15-50397	15	50397	29008	31923	9	Lus10007604	29008	31923	RLK	Lu15-29018	29018	2.15	Lus10007604*	18474	N	Y		Lu15-50397	RLK	Lus10007604*
Lu15-50397	15	50397	11369	14331	9	Lus10007601	11369	14331	RLK	Lu15-12677	12677	7.78	Lus10007601*	36066	N	Y		Lu15-50397	RLK	Lus10007601*
Lu15-50397	15	50397	138808	141347	9	Lus10007632	138808	141347	RLK	Lu15-139914	139914	9.75	Lus10007632*	88411	N	Y		Lu15-50397	RLK	Lus10007632*
Lu15-50397	15	50397	144985	147520	9	Lus10007633	144985	147520	RLK	Lu15-146830	146830	6.4	Lus10007633*	94588	N	Y		Lu15-50397	RLK	Lus10007633*
Lu15-50397	15	50397	148939	151622	9	Lus10007634	148939	151622	RLK	Lu15-150413	150413	9.43	Lus10007634*	98542	N	Y		Lu15-50397	RLK	Lus10007634*
Lu15-210803	15	210803	134861	137811	9.28	Lus10007631	134861	137811	RLK				Lus10007631	72992	N	N		Lu15-210803	RLK	Lus10007631
Lu15-210803	15	210803	152797	159648	9.28	Lus10007635	152797	159648	RLK	Lu15-158951	158951	8.19	Lus10007635*	51155	N	Y	1	Lu15-210803	RLK	Lus10007635*
Lu15-210803	15	210803	148939	151622	9.28	Lus10007634	148939	151622	RLK	Lu15-150413	150413	9.43	Lus10007634*	59181	N	Y		Lu15-210803	RLK	Lus10007634*
Lu15-210803	15	210803	144985	147520	9.28	Lus10007633	144985	147520	RLK	Lu15-146830	146830	6.4	Lus10007633*	63283	N	Y		Lu15-210803	RLK	Lus10007633*
Lu15-210803	15	210803	138808	141347	9.28	Lus10007632	138808	141347	RLK	Lu15-139914	139914	9.75	Lus10007632*	69456	N	Y		Lu15-210803	RLK	Lus10007632*
Lu15-1743269	15	1743269	1752890	1755753	1.3	Lus10013910	1752890	1755753	RLK				Lus10013910	9621	N	N	1	Lu15-1743269	RLK	Lus10013910
Lu15-1750689	15	1750689	1752890	1755753	1.55	Lus10013910	1752890	1755753	RLK				Lus10013910	2201	N	N	1	Lu15-1750689	RLK	Lus10013910
Lu15-2267652	15	2267652	2287700	2288290	11.81	Lus10029306	2287700	2288290	DIR				Lus10029306	20048	N	N	1	Lu15-2267652	DIR	Lus10029306
Lu15-2267652	15	2267652	2328170	2328667	11.81	Lus10029312	2328170	2328667	DIR				Lus10029312	60518	N	N		Lu15-2267652	DIR	Lus10029312
Lu15-2388308	15	2388308	2328170	2328667	4.08	Lus10029312	2328170	2328667	DIR				Lus10029312	59641	N	N	1	Lu15-2388308	DIR	Lus10029312
Lu15-3911640	15	3911640	3866177	3870320	7.09	Lus10012698	3866177	3870320	MLO	Lu15-3866559	3866559	8.4	Lus10012698*	41320	N	Y	1	Lu15-3911640	MLO	Lus10012698*
Lu15-3911640	15	3911640	3990588	4001681	7.09	Lus10012678	3990588	4001681	WRKY	Lu15-3999003	3999003	18.51	Lus10012678*	78948	N	Y		Lu15-3911640	WRKY	Lus10012678*
Lu15-3991048	15	3991048	3990588	4001681	3.48	Lus10012678	3990588	4001681	WRKY	Lu15-3999003	3999003	18.51	Lus10012678**	0	Y	Y	1	Lu15-3991048	WRKY	Lus10012678**
Lu15-7063700	15	7063700	6987299	6990719	6.46	Lus10001489	6987299	6990719	RLK				Lus10001489	72981	N	N	1	Lu15-7063700	RLK	Lus10001489
Lu15-7064467	15	7064467	6987299	6990719	0.44	Lus10001489	6987299	6990719	RLK				Lus10001489	73748	N	N	1	Lu15-7064467	RLK	Lus10001489
Lu15-9561257	15	9561257	9652963	9658293	4.4	Lus10041180	9652963	9658293	RLK	Lu15-9655968	9655968	10.24	Lus10041180*	91706	N	Y	1	Lu15-9561257	RLK	Lus10041180*
Lu15-10007503	15	10007503	10053796	10055048	0.91	Lus10041266	10053796	10055048	RLP	Lu15-10054949	10054949	1.65	Lus10041266*	46293	N	Y	1	Lu15-10007503	RLP	Lus10041266*
Lu15-10007503	15	10007503	9929463	9932255	0.91	Lus10041243	9929463	9932255	CNL	Lu15-9931487	9931487	15.95	Lus10041243*	75248	N	Y		Lu15-10007503	CNL	Lus10041243*
Lu15-13552352	15	13552352	13607216	13610043	2.29	Lus10038017	13607216	13610043	TM-CC				Lus10038017	54864	N	N		Lu15-13552352	TM-CC	Lus10038017
Lu15-13552352	15	13552352	13510053	13511304	2.29	Lus10009969	13510053	13511304	WRKY	Lu15-13510664	13510664	0.77	Lus10009969*	41048	N	Y	1	Lu15-13552352	WRKY	Lus10009969*
Lu15-13858487	15	13858487	13904865	13906814	0.18	Lus10037955	13904865	13906814	RLK	Lu15-13905581	13905581	8.22	Lus10037955*	46378	N	Y	1	Lu15-13858487	RLK	Lus10037955*
Lu15-13858487	15	13858487	13907069	13908039	0.18	Lus10037954	13907069	13908039	RLK	Lu15-13907697	13907697	6.16	Lus10037954*	48582	N	Y		Lu15-13858487	RLK	Lus10037954*
Lu15-13858487	15	13858487	13937325	13940541	0.18	Lus10037947	13937325	13940541	TM-CC	Lu15-13937880	13937880	5.9	Lus10037947*	78838	N	Y		Lu15-13858487	TM-CC	Lus10037947*
Lu15-14502675	15	14502675	14432061	14436021	0.05	Lus10037840	14432061	14436021	RLK	Lu15-14432903	14432903	1.55	Lus10037840*	66654	N	Y	1	Lu15-14502675	RLK	Lus10037840*
Lu15-14502675	15	14502675	14581443	14587086	0.05	Lus10014829	14581443	14587086	TNL	Lu15-14585103	14585103	0.58	Lus10014829*	78768	N	Y		Lu15-14502675	TNL	Lus10014829*
*: the QTN was not identified from the candidate gene; but the candidate gene had at least one SNP that had significant allele effects between two alleles of the SNP.
**: a QTN was identified on the candidate genes
