# Supplementary material for: Insights into the Genetic Architecture and Genomic Prediction of Powdery Mildew Resistance in Flax (Linum usitatissimum L.)
Source: Int J Mol Sci. 2022 Apr 29;23(9):4960. doi: 10.3390/ijms23094960 (PMC9104541; doi:10.3390/ijms23094960)
Supplement: Supplementary file 1 [file ijms-23-04960-s001.zip › TableS9.xlsx]

## Sheet: TableS9_duplciated genes
Table S9. Duplicate candidate genes co-located with quantitative trait nucleotides (QTNs) associated with powdery mildew ratings in flax.
tagQTN	Chr	Pos	QTN R2	Gene ID	Candidate gene start	Candidate gene end	family	Distance to QTN (bp)	Duplicate QTN	Duplicate Chr	Duplicate QTN pos	Duplicate QTN R2	Duplicate candidate gene Chr	Duplicate candidate gene ID	Duplicate candidate gene start	Duplicate candidate gene end	Duplicate candidate gene family	Duplicate candidate gene similarity
Lu2-1672205	2	1672205	30.2	Lus10019654	1583715	1588562	TNL	83643	Lu13-331509	13	331509	3.78	13	Lus10000744	313767	314614	TNL	0.71
Lu5-15697144	5	15697144	25.18	Lus10024081	15725123	15728803	RLK	27979	Lu4-15155007	4	15155007	1.01	4	Lus10041639	15185355	15189194	RLK	0.95
Lu5-15697144	5	15697144	25.18	Lus10024060	15601599	15607466	RLK	89678	Lu5-15681773	5	15681773	8.71	5	Lus10024061	15611592	15617378	RLK	0.98
Lu5-15697144	5	15697144	25.18	Lus10024061	15611592	15617378	RLK	79766	Lu5-15681773	5	15681773	8.71	5	Lus10024060	15601599	15607466	RLK	0.98
Lu5-15697144	5	15697144	25.18	Lus10024074	15698530	15699898	WRKY	1386	Lu13-3599975	13	3599975	0.54	13	Lus10026082	3605340	3606813	WRKY	0.59
Lu7-17007593	7	17007593	22.62	Lus10015472	16928445	16928858	RLK	78735	Lu1-25225402	1	25225402	6.25	1	Lus10028019	25231874	25232281	RLK	0.52
Lu7-17007593	7	17007593	22.62	Lus10015461	16979755	16981169	MLO	26424	Lu15-3911640	15	3911640	7.09	15	Lus10012698	3866177	3870320	MLO	0.67
Lu9-3920670	9	3920670	20.89	Lus10040388	4010807	4014021	MLO	90137	Lu7-3425810	7	3425810	1.7	7	Lus10023506	3368906	3372339	MLO	0.92
Lu5-1763832	5	1763832	16.34	Lus10008486	1714708	1718110	RLK	45722	Lu15-7064467	15	7064467	0.44	15	Lus10001489	6987299	6990719	RLK	0.96
Lu8-19040276	8	19040276	15.67	Lus10002249	19037487	19042009	TNL	1733	Lu8-18946459	8	18946459	0.05	8	Lus10002247	19020694	19023979	TNL	0.8
Lu8-19040276	8	19040276	15.67	Lus10002247	19020694	19023979	TNL	16297	Lu8-18946459	8	18946459	0.05	8	Lus10002249	19037487	19042009	TNL	0.8
Lu5-1552921	5	1552921	15	Lus10004747	1449598	1453554	TNL	99367	Lu3-5723804	3	5723804	1.52	3	Lus10040576	5746000	5750240	TNL	0.55
Lu13-4791823	13	4791823	13.79	Lus10000836	4816848	4818268	RPW8	25025	Lu13-4830850	13	4830850	7.17	13	Lus10009328	4871884	4875204	RPW8	0.69
Lu13-4791823	13	4791823	13.79	Lus10009328	4871884	4875204	RPW8	80061	Lu13-4830850	13	4830850	7.17	13	Lus10000836	4816848	4818268	RPW8	0.67
Lu13-4048698	13	4048698	12.66	Lus10002755	4144251	4147241	RLP	95553	Lu2-2254607	2	2254607	9.78	2	Lus10016341	2311709	2314696	RLP	0.92
Lu8-18951212	8	18951212	12.48	Lus10002247	19020694	19023979	TNL	69482	Lu8-18946459	8	18946459	0.05	8	Lus10002249	19037487	19042009	TNL	0.8
Lu8-18951212	8	18951212	12.48	Lus10002249	19037487	19042009	TNL	86275	Lu8-18946459	8	18946459	0.05	8	Lus10002247	19020694	19023979	TNL	0.8
Lu13-4866704	13	4866704	12.24	Lus10000836	4816848	4818268	RPW8	48436	Lu13-4830850	13	4830850	7.17	13	Lus10009328	4871884	4875204	RPW8	0.69
Lu13-4866704	13	4866704	12.24	Lus10009328	4871884	4875204	RPW8	5180	Lu13-4830850	13	4830850	7.17	13	Lus10000836	4816848	4818268	RPW8	0.67
Lu3-1644588	3	1644588	11.92	Lus10037311	1738506	1742264	RLK	93918	Lu3-1743768	3	1743768	0.67	3	Lus10037310	1744034	1747357	RLK	0.58
Lu3-1644588	3	1644588	11.92	Lus10037310	1744034	1747357	RLK	99446	Lu3-1743768	3	1743768	0.67	3	Lus10037311	1738506	1742264	RLK	0.58
Lu15-46304	15	46304	11.6	Lus10007604	29008	31923	RLK	14381	Lu6-16837004	6	16837004	4.15	6	Lus10025242	16773894	16774565	RLK	0.76
Lu15-46304	15	46304	11.6	Lus10007601	11369	14331	RLK	31973	Lu8-23605626	8	23605626	1.31	8	Lus10018406	23513943	23517004	RLK	0.85
Lu15-46304	15	46304	11.6	Lus10007609	46613	47143	RLK	309	Lu8-23605626	8	23605626	1.31	8	Lus10018402	23532325	23535966	RLK	0.96
Lu15-46304	15	46304	11.6	Lus10007632	138808	141347	RLK	92504	Lu8-23605626	8	23605626	1.31	8	Lus10018382	23623813	23626346	RLK	0.84
Lu15-46304	15	46304	11.6	Lus10007610	47907	50779	RLK	1603	Lu15-1743269	15	1743269	1.3	15	Lus10013910	1752890	1755753	RLK	0.73
Lu13-4900476	13	4900476	10.9	Lus10000836	4816848	4818268	RPW8	82208	Lu13-4830850	13	4830850	7.17	13	Lus10009328	4871884	4875204	RPW8	0.69
Lu13-4900476	13	4900476	10.9	Lus10009328	4871884	4875204	RPW8	25272	Lu13-4830850	13	4830850	7.17	13	Lus10000836	4816848	4818268	RPW8	0.67
Lu4-11526385	4	11526385	10.76	Lus10036704	11468188	11468577	RLK	57808	Lu4-11526385	4	11526385	10.76	4	Lus10036697	11441987	11442748	RLK	0.66
Lu4-11526385	4	11526385	10.76	Lus10036697	11441987	11442748	RLK	83637	Lu4-11526385	4	11526385	10.76	4	Lus10036704	11468188	11468577	RLK	0.69
Lu9-4948236	9	4948236	10.59	Lus10028292	5039187	5042259	TM-CC	90951	Lu7-4389073	7	4389073	0.77	7	Lus10040196	4376947	4380527	TM-CC	0.9
Lu9-4948236	9	4948236	10.59	Lus10028279	4972365	4975644	CNL	24129	Lu7-4389073	7	4389073	0.77	7	Lus10040210	4309085	4309381	CNL	0.85
Lu5-1402378	5	1402378	9.96	Lus10004747	1449598	1453554	TNL	47220	Lu3-5723804	3	5723804	1.52	3	Lus10040576	5746000	5750240	TNL	0.55
Lu14-1254821	14	1254821	9.79	Lus10028639	1171345	1174215	CNL	80606	Lu1-26466257	1	26466257	1.79	1	Lus10014712	26487140	26490037	CNL	0.6
Lu2-2254607	2	2254607	9.78	Lus10016338	2324392	2326916	RLP	69785	Lu2-2254607	2	2254607	9.78	2	Lus10016337	2328690	2332210	RLP	0.79
Lu2-2254607	2	2254607	9.78	Lus10016337	2328690	2332210	RLP	74083	Lu2-2254607	2	2254607	9.78	2	Lus10016338	2324392	2326916	RLP	0.79
Lu2-2254607	2	2254607	9.78	Lus10016342	2307887	2310784	RLP	53280	Lu13-4136428	13	4136428	1.44	13	Lus10002757	4155858	4156274	RLP	0.78
Lu2-2254607	2	2254607	9.78	Lus10016344	2296482	2299289	RLP	41875	Lu13-4136428	13	4136428	1.44	13	Lus10002758	4156861	4159803	RLP	0.88
Lu2-2254607	2	2254607	9.78	Lus10016341	2311709	2314696	RLP	57102	Lu13-4136428	13	4136428	1.44	13	Lus10002755	4144251	4147241	RLP	0.92
Lu15-210803	15	210803	9.28	Lus10007632	138808	141347	RLK	69456	Lu8-23605626	8	23605626	1.31	8	Lus10018382	23623813	23626346	RLK	0.84
Lu13-357119	13	357119	8.88	Lus10000744	313767	314614	TNL	42505	Lu2-1678019	2	1678019	1.88	2	Lus10019654	1583715	1588562	TNL	0.71
Lu5-15681773	5	15681773	8.71	Lus10024081	15725123	15728803	RLK	43350	Lu4-15155007	4	15155007	1.01	4	Lus10041639	15185355	15189194	RLK	0.95
Lu5-15681773	5	15681773	8.71	Lus10024060	15601599	15607466	RLK	74307	Lu5-15681773	5	15681773	8.71	5	Lus10024061	15611592	15617378	RLK	0.98
Lu5-15681773	5	15681773	8.71	Lus10024061	15611592	15617378	RLK	64395	Lu5-15681773	5	15681773	8.71	5	Lus10024060	15601599	15607466	RLK	0.98
Lu5-15681773	5	15681773	8.71	Lus10024074	15698530	15699898	WRKY	16757	Lu13-3599975	13	3599975	0.54	13	Lus10026082	3605340	3606813	WRKY	0.59
Lu5-1403794	5	1403794	8.67	Lus10004747	1449598	1453554	TNL	45804	Lu3-5723804	3	5723804	1.52	3	Lus10040576	5746000	5750240	TNL	0.55
Lu6-14339498	6	14339498	8.44	Lus10025064	14436889	14437416	DIR	97391	Lu6-14405712	6	14405712	6.65	6	Lus10025065	14438998	14439717	DIR	0.69
Lu6-14339498	6	14339498	8.44	Lus10025065	14438998	14439717	DIR	99500	Lu6-14405712	6	14405712	6.65	6	Lus10025064	14436889	14437416	DIR	0.69
Lu2-4181088	2	4181088	8.17	Lus10020183	4257022	4259288	RLK	75934	Lu3-1743768	3	1743768	0.67	3	Lus10037297	1815017	1816267	RLK	0.5
Lu1-2878991	1	2878991	7.47	Lus10042458	2871770	2873117	RLP	5874	Lu11-4814792	11	4814792	2.92	11	Lus10026208	4900247	4901703	RLP	0.91
Lu5-1863116	5	1863116	7.25	Lus10029585	1900103	1900468	DIR	36987	Lu8-19197787	8	19197787	0.22	8	Lus10006317	19172422	19173282	DIR	0.98
Lu13-4830850	13	4830850	7.17	Lus10000836	4816848	4818268	RPW8	12582	Lu13-4830850	13	4830850	7.17	13	Lus10009328	4871884	4875204	RPW8	0.69
Lu13-4830850	13	4830850	7.17	Lus10009328	4871884	4875204	RPW8	41034	Lu13-4830850	13	4830850	7.17	13	Lus10000836	4816848	4818268	RPW8	0.67
Lu15-3911640	15	3911640	7.09	Lus10012698	3866177	3870320	MLO	41320	Lu7-17007593	7	17007593	22.62	7	Lus10015461	16979755	16981169	MLO	0.67
Lu3-24637381	3	24637381	6.99	Lus10037731	24676809	24679724	RLK	39428	Lu3-24637381	3	24637381	6.99	3	Lus10037729	24681294	24684669	RLK	0.79
Lu3-24637381	3	24637381	6.99	Lus10037729	24681294	24684669	RLK	43913	Lu3-24637381	3	24637381	6.99	3	Lus10037731	24676809	24679724	RLK	0.78
Lu14-2220099	14	2220099	6.89	Lus10025544	2230403	2232708	RLK	10304	Lu14-2160157	14	2160157	0.9	14	Lus10025545	2235555	2236556	RLK	0.5
Lu14-2220099	14	2220099	6.89	Lus10025545	2235555	2236556	RLK	15456	Lu14-2160157	14	2160157	0.9	14	Lus10025544	2230403	2232708	RLK	0.51
Lu6-14405712	6	14405712	6.65	Lus10025064	14436889	14437416	DIR	31177	Lu6-14405712	6	14405712	6.65	6	Lus10025065	14438998	14439717	DIR	0.69
Lu6-14405712	6	14405712	6.65	Lus10025065	14438998	14439717	DIR	33286	Lu6-14405712	6	14405712	6.65	6	Lus10025064	14436889	14437416	DIR	0.69
Lu1-25261905	1	25261905	6.63	Lus10028019	25231874	25232281	RLK	29624	Lu7-17007593	7	17007593	22.62	7	Lus10015472	16928445	16928858	RLK	0.52
Lu15-7063700	15	7063700	6.46	Lus10001489	6987299	6990719	RLK	72981	Lu5-1763832	5	1763832	16.34	5	Lus10008486	1714708	1718110	RLK	0.96
Lu10-16137842	10	16137842	6.41	Lus10022900	16154230	16157202	CNL	16388	Lu5-1333779	5	1333779	3.63	5	Lus10029705	1289543	1290535	CNL	0.64
Lu2-23184917	2	23184917	6.31	Lus10013246	23172063	23175081	RLK	9836	Lu2-23259700	2	23259700	3.47	2	Lus10013244	23157915	23160932	RLK	0.81
Lu2-23184917	2	23184917	6.31	Lus10013244	23157915	23160932	RLK	23985	Lu2-23259700	2	23259700	3.47	2	Lus10013246	23172063	23175081	RLK	0.8
Lu7-2731752	7	2731752	6.28	Lus10012193	2695771	2698659	RLK	33093	Lu9-3234392	9	3234392	0.59	9	Lus10007543	3295804	3298169	RLK	0.95
Lu1-25225402	1	25225402	6.25	Lus10028019	25231874	25232281	RLK	6472	Lu7-17007593	7	17007593	22.62	7	Lus10015472	16928445	16928858	RLK	0.52
Lu13-3523564	13	3523564	5.79	Lus10026082	3605340	3606813	WRKY	81776	Lu5-15681773	5	15681773	8.71	5	Lus10024074	15698530	15699898	WRKY	0.6
Lu4-15107754	4	15107754	5.65	Lus10041639	15185355	15189194	RLK	77601	Lu5-15681773	5	15681773	8.71	5	Lus10024081	15725123	15728803	RLK	0.95
Lu4-15107754	4	15107754	5.65	Lus10041606	15023270	15024256	TNL	83498	Lu13-2038032	13	2038032	0.59	13	Lus10026845	1944672	1945903	TNL	0.79
Lu15-7062340	15	7062340	5.09	Lus10001489	6987299	6990719	RLK	71621	Lu5-1763832	5	1763832	16.34	5	Lus10008486	1714708	1718110	RLK	0.96
Lu6-16849336	6	16849336	5.03	Lus10025242	16773894	16774565	RLK	74771	Lu15-2178	15	2178	3.4	15	Lus10007604	29008	31923	RLK	0.76
Lu14-2216515	14	2216515	4.87	Lus10025544	2230403	2232708	RLK	13888	Lu14-2160157	14	2160157	0.9	14	Lus10025545	2235555	2236556	RLK	0.5
Lu14-2216515	14	2216515	4.87	Lus10025545	2235555	2236556	RLK	19040	Lu14-2160157	14	2160157	0.9	14	Lus10025544	2230403	2232708	RLK	0.51
Lu13-348196	13	348196	4.79	Lus10000744	313767	314614	TNL	33582	Lu2-1678019	2	1678019	1.88	2	Lus10019654	1583715	1588562	TNL	0.71
Lu14-16744523	14	16744523	4.79	Lus10017996	16656320	16658772	RLK	85751	Lu11-3025137	11	3025137	1.39	11	Lus10041992	2951911	2953009	RLK	0.98
Lu14-415594	14	415594	4.72	Lus10009429	457234	460472	RLK	41640	Lu1-28738634	1	28738634	0.55	1	Lus10006067	28745009	28748864	RLK	0.77
Lu1-27499441	1	27499441	4.69	Lus10010085	27513205	27516324	TM-CC	13764	Lu15-13552352	15	13552352	2.29	15	Lus10038017	13607216	13610043	TM-CC	0.78
Lu10-723479	10	723479	4.52	Lus10031860	777431	781117	RLK	53952	Lu11-18955548	11	18955548	0.32	11	Lus10031290	19014401	19016992	RLK	0.58
Lu3-1712987	3	1712987	4.48	Lus10037311	1738506	1742264	RLK	25519	Lu3-1743768	3	1743768	0.67	3	Lus10037310	1744034	1747357	RLK	0.58
Lu3-1712987	3	1712987	4.48	Lus10037310	1744034	1747357	RLK	31047	Lu3-1743768	3	1743768	0.67	3	Lus10037311	1738506	1742264	RLK	0.58
Lu10-16129328	10	16129328	4.17	Lus10022900	16154230	16157202	CNL	24902	Lu5-1333779	5	1333779	3.63	5	Lus10029705	1289543	1290535	CNL	0.64
Lu6-16837004	6	16837004	4.15	Lus10025242	16773894	16774565	RLK	62439	Lu15-2178	15	2178	3.4	15	Lus10007604	29008	31923	RLK	0.76
Lu9-19185021	9	19185021	3.99	Lus10024864	19227035	19228510	WRKY	42014	Lu3-19020070	3	19020070	1.05	3	Lus10033857	18931785	18933361	WRKY	0.71
Lu12-18665793	12	18665793	3.83	Lus10003072	18723654	18726224	RLK	57861	Lu9-6273089	9	6273089	0.46	9	Lus10031043	6265980	6269593	RLK	0.54
Lu13-331509	13	331509	3.78	Lus10000744	313767	314614	TNL	16895	Lu2-1678019	2	1678019	1.88	2	Lus10019654	1583715	1588562	TNL	0.71
Lu5-1333995	5	1333995	3.72	Lus10029705	1289543	1290535	CNL	43460	Lu10-16094406	10	16094406	0.84	10	Lus10022900	16154230	16157202	CNL	0.65
Lu5-1333779	5	1333779	3.63	Lus10029705	1289543	1290535	CNL	43244	Lu10-16094406	10	16094406	0.84	10	Lus10022900	16154230	16157202	CNL	0.65
Lu2-23259700	2	23259700	3.47	Lus10013246	23172063	23175081	RLK	84619	Lu2-23259700	2	23259700	3.47	2	Lus10013244	23157915	23160932	RLK	0.81
Lu2-23259700	2	23259700	3.47	Lus10013244	23157915	23160932	RLK	98768	Lu2-23259700	2	23259700	3.47	2	Lus10013246	23172063	23175081	RLK	0.8
Lu15-2178	15	2178	3.4	Lus10007604	29008	31923	RLK	26830	Lu6-16837004	6	16837004	4.15	6	Lus10025242	16773894	16774565	RLK	0.76
Lu15-2178	15	2178	3.4	Lus10007601	11369	14331	RLK	9191	Lu8-23605626	8	23605626	1.31	8	Lus10018406	23513943	23517004	RLK	0.85
Lu15-2178	15	2178	3.4	Lus10007609	46613	47143	RLK	44435	Lu8-23605626	8	23605626	1.31	8	Lus10018402	23532325	23535966	RLK	0.96
Lu15-2178	15	2178	3.4	Lus10007610	47907	50779	RLK	45729	Lu15-1743269	15	1743269	1.3	15	Lus10013910	1752890	1755753	RLK	0.73
Lu12-1884050	12	1884050	3.32	Lus10023339	1833679	1837008	RLK	47042	Lu1-302574	1	302574	0.11	1	Lus10036136	241089	242719	RLK	0.76
Lu12-1884050	12	1884050	3.32	Lus10023329	1873149	1874696	TNL	9354	Lu7-3425810	7	3425810	1.7	7	Lus10023487	3467614	3471603	TNL	0.56
Lu11-620390	11	620390	3.22	Lus10027239	634273	635683	RLP	13883	Lu4-13869828	4	13869828	2.85	4	Lus10034384	13844908	13846808	RLP	0.54
Lu9-5067368	9	5067368	3.2	Lus10028292	5039187	5042259	TM-CC	25109	Lu7-4389073	7	4389073	0.77	7	Lus10040196	4376947	4380527	TM-CC	0.9
Lu9-5067368	9	5067368	3.2	Lus10004388	5131906	5138235	RLK	64538	Lu7-4389073	7	4389073	0.77	7	Lus10040186	4443831	4446900	RLK	0.9
Lu9-5067368	9	5067368	3.2	Lus10028279	4972365	4975644	CNL	91724	Lu7-4389073	7	4389073	0.77	7	Lus10040210	4309085	4309381	CNL	0.85
Lu14-5960489	14	5960489	3.08	Lus10015648	5955689	5959658	TNL	831	Lu14-5960489	14	5960489	3.08	14	Lus10015650	5963346	5966177	TNL	0.89
Lu14-5960489	14	5960489	3.08	Lus10015650	5963346	5966177	TNL	2857	Lu14-5960489	14	5960489	3.08	14	Lus10015648	5955689	5959658	TNL	0.89
Lu11-4814792	11	4814792	2.92	Lus10026208	4900247	4901703	RLP	85455	Lu1-2878991	1	2878991	7.47	1	Lus10042458	2871770	2873117	RLP	0.93
Lu4-13869828	4	13869828	2.85	Lus10034384	13844908	13846808	RLP	23020	Lu11-603845	11	603845	0.32	11	Lus10027239	634273	635683	RLP	0.54
Lu12-720013	12	720013	2.61	Lus10006746	819557	822893	RLK	99544	Lu1-26466257	1	26466257	1.79	1	Lus10014723	26538142	26539029	RLK	0.58
Lu1-9931894	1	9931894	2.59	Lus10022736	9920158	9921484	WRKY	10410	Lu14-5243599	14	5243599	1.3	14	Lus10014177	5170010	5171567	WRKY	0.83
Lu1-9931894	1	9931894	2.59	Lus10022728	9947629	9950374	RLK	15735	Lu14-5243599	14	5243599	1.3	14	Lus10014185	5145249	5147954	RLK	0.96
Lu1-9931894	1	9931894	2.59	Lus10022738	9904469	9907409	RLK	24485	Lu14-5243599	14	5243599	1.3	14	Lus10014174	5183018	5185961	RLK	0.94
Lu2-4369359	2	4369359	2.52	Lus10020215	4421980	4423988	WRKY	52621	Lu13-2038032	13	2038032	0.59	13	Lus10026838	1981440	1985178	WRKY	0.92
Lu2-4369359	2	4369359	2.52	Lus10020188	4283474	4286653	TM-CC	82706	Lu13-2038032	13	2038032	0.59	13	Lus10026992	2109984	2112573	TM-CC	0.93
Lu2-4369359	2	4369359	2.52	Lus10020189	4289398	4291506	RLP	77853	Lu13-2038032	13	2038032	0.59	13	Lus10026993	2107200	2109308	RLP	0.94
Lu7-2864158	7	2864158	2.41	Lus10011302	2838905	2841730	RLK	22428	Lu9-3389033	9	3389033	0.61	9	Lus10040500	3458671	3461533	RLK	0.96
Lu13-17247218	13	17247218	2.32	Lus10025578	17222805	17224022	RLP	23196	Lu1-16481152	1	16481152	0.32	1	Lus10027040	16459072	16459731	RLP	0.93
Lu15-13552352	15	13552352	2.29	Lus10038017	13607216	13610043	TM-CC	54864	Lu1-27439547	1	27439547	0.14	1	Lus10010085	27513205	27516324	TM-CC	0.78
Lu13-5667491	13	5667491	2.29	Lus10011576	5672600	5675656	RLK	5109	Lu2-805034	2	805034	0.86	2	Lus10019248	722575	726044	RLK	0.94
Lu8-22034371	8	22034371	2.27	Lus10006611	22017713	22018966	RLP	15405	Lu8-22034371	8	22034371	2.27	8	Lus10006610	22013669	22014085	RLP	0.54
Lu8-22034371	8	22034371	2.27	Lus10006610	22013669	22014085	RLP	20286	Lu8-22034371	8	22034371	2.27	8	Lus10006611	22017713	22018966	RLP	0.54
Lu1-1888391	1	1888391	2.07	Lus10025875	1966159	1966953	RLK	77768	Lu11-5325415	11	5325415	0.21	11	Lus10038227	5399813	5400616	RLK	0.86
Lu12-5085475	12	5085475	2	Lus10018289	5110353	5112941	TM-CC	24878	Lu3-6007426	3	6007426	0.34	3	Lus10040620	5998536	6001221	TM-CC	0.94
Lu14-15588631	14	15588631	1.93	Lus10003244	15659036	15664924	RLK	70405	Lu3-4335448	3	4335448	0.02	3	Lus10019114	4381523	4388318	RLK	0.55
Lu13-18313086	13	18313086	1.9	Lus10030851	18251116	18254564	RLK	58522	Lu13-18313086	13	18313086	1.9	13	Lus10030847	18222200	18225706	RLK	0.7
Lu13-18313086	13	18313086	1.9	Lus10030847	18222200	18225706	RLK	87380	Lu13-18313086	13	18313086	1.9	13	Lus10030851	18251116	18254564	RLK	0.7
Lu13-18313086	13	18313086	1.9	Lus10030856	18281785	18285734	RLK	27352	Lu13-18313086	13	18313086	1.9	13	Lus10030855	18277829	18280950	RLK	0.78
Lu13-18313086	13	18313086	1.9	Lus10030855	18277829	18280950	RLK	32136	Lu13-18313086	13	18313086	1.9	13	Lus10030856	18281785	18285734	RLK	0.78
Lu13-18313086	13	18313086	1.9	Lus10030846	18218174	18221600	RLK	91486	Lu13-18313086	13	18313086	1.9	13	Lus10030845	18211794	18215062	RLK	0.81
Lu13-18313086	13	18313086	1.9	Lus10030845	18211794	18215062	RLK	98024	Lu13-18313086	13	18313086	1.9	13	Lus10030846	18218174	18221600	RLK	0.8
Lu2-1678019	2	1678019	1.88	Lus10019654	1583715	1588562	TNL	89457	Lu13-331509	13	331509	3.78	13	Lus10000744	313767	314614	TNL	0.71
Lu10-13703428	10	13703428	1.8	Lus10042714	13695454	13699694	TNL	3734	Lu13-2996936	13	2996936	1.06	13	Lus10001040	2914341	2915277	TNL	0.73
Lu1-26466257	1	26466257	1.79	Lus10014723	26538142	26539029	RLK	71885	Lu12-720013	12	720013	2.61	12	Lus10006746	819557	822893	RLK	0.57
Lu1-26466257	1	26466257	1.79	Lus10014712	26487140	26490037	CNL	20883	Lu14-1254821	14	1254821	9.79	14	Lus10028639	1171345	1174215	CNL	0.6
Lu7-3425810	7	3425810	1.7	Lus10023506	3368906	3372339	MLO	53471	Lu9-3920670	9	3920670	20.89	9	Lus10040388	4010807	4014021	MLO	0.92
Lu7-3425810	7	3425810	1.7	Lus10023487	3467614	3471603	TNL	41804	Lu12-1884050	12	1884050	3.32	12	Lus10023329	1873149	1874696	TNL	0.55
Lu15-1750689	15	1750689	1.55	Lus10013910	1752890	1755753	RLK	2201	Lu15-2178	15	2178	3.4	15	Lus10007610	47907	50779	RLK	0.73
Lu11-3026536	11	3026536	1.54	Lus10042023	3065596	3070805	TM-CC	39060	Lu14-16548135	14	16548135	0.01	14	Lus10018027	16539146	16544259	TM-CC	0.94
Lu11-3026536	11	3026536	1.54	Lus10041992	2951911	2953009	RLK	73527	Lu14-16744523	14	16744523	4.79	14	Lus10017996	16656320	16658772	RLK	0.98
Lu4-9252639	4	9252639	1.53	Lus10013039	9303097	9305517	RLK	50458	Lu2-23956609	2	23956609	1.39	2	Lus10030589	23945145	23948006	RLK	0.75
Lu3-5723804	3	5723804	1.52	Lus10040576	5746000	5750240	TNL	22196	Lu5-1403794	5	1403794	8.67	5	Lus10004747	1449598	1453554	TNL	0.56
Lu14-5213933	14	5213933	1.49	Lus10014177	5170010	5171567	WRKY	42366	Lu1-9931894	1	9931894	2.59	1	Lus10022736	9920158	9921484	WRKY	0.82
Lu14-5213933	14	5213933	1.49	Lus10014174	5183018	5185961	RLK	27972	Lu1-9931894	1	9931894	2.59	1	Lus10022738	9904469	9907409	RLK	0.95
Lu14-5213933	14	5213933	1.49	Lus10014185	5145249	5147954	RLK	65979	Lu1-9931894	1	9931894	2.59	1	Lus10022728	9947629	9950374	RLK	0.96
Lu13-4136428	13	4136428	1.44	Lus10002757	4155858	4156274	RLP	19430	Lu2-2254607	2	2254607	9.78	2	Lus10016342	2307887	2310784	RLP	0.78
Lu13-4136428	13	4136428	1.44	Lus10002758	4156861	4159803	RLP	20433	Lu2-2254607	2	2254607	9.78	2	Lus10016344	2296482	2299289	RLP	0.88
Lu13-4136428	13	4136428	1.44	Lus10002755	4144251	4147241	RLP	7823	Lu2-2254607	2	2254607	9.78	2	Lus10016341	2311709	2314696	RLP	0.92
Lu2-23956609	2	23956609	1.39	Lus10030589	23945145	23948006	RLK	8603	Lu4-9252639	4	9252639	1.53	4	Lus10013039	9303097	9305517	RLK	0.73
Lu11-3025137	11	3025137	1.39	Lus10042023	3065596	3070805	TM-CC	40459	Lu14-16548135	14	16548135	0.01	14	Lus10018027	16539146	16544259	TM-CC	0.94
Lu11-3025137	11	3025137	1.39	Lus10041992	2951911	2953009	RLK	72128	Lu14-16744523	14	16744523	4.79	14	Lus10017996	16656320	16658772	RLK	0.98
Lu8-23605626	8	23605626	1.31	Lus10018406	23513943	23517004	RLK	88622	Lu15-2178	15	2178	3.4	15	Lus10007601	11369	14331	RLK	0.85
Lu8-23605626	8	23605626	1.31	Lus10018382	23623813	23626346	RLK	18187	Lu15-210803	15	210803	9.28	15	Lus10007632	138808	141347	RLK	0.83
Lu8-23605626	8	23605626	1.31	Lus10018402	23532325	23535966	RLK	69660	Lu15-2178	15	2178	3.4	15	Lus10007609	46613	47143	RLK	0.96
Lu14-5243599	14	5243599	1.3	Lus10014177	5170010	5171567	WRKY	72032	Lu1-9931894	1	9931894	2.59	1	Lus10022736	9920158	9921484	WRKY	0.82
Lu14-5243599	14	5243599	1.3	Lus10014174	5183018	5185961	RLK	57638	Lu1-9931894	1	9931894	2.59	1	Lus10022738	9904469	9907409	RLK	0.95
Lu14-5243599	14	5243599	1.3	Lus10014185	5145249	5147954	RLK	95645	Lu1-9931894	1	9931894	2.59	1	Lus10022728	9947629	9950374	RLK	0.96
Lu15-1743269	15	1743269	1.3	Lus10013910	1752890	1755753	RLK	9621	Lu15-2178	15	2178	3.4	15	Lus10007610	47907	50779	RLK	0.73
Lu13-2996936	13	2996936	1.06	Lus10001040	2914341	2915277	TNL	81659	Lu10-13703428	10	13703428	1.8	10	Lus10042714	13695454	13699694	TNL	0.73
Lu3-19020070	3	19020070	1.05	Lus10033857	18931785	18933361	WRKY	86709	Lu9-19185021	9	19185021	3.99	9	Lus10024864	19227035	19228510	WRKY	0.74
Lu4-15155007	4	15155007	1.01	Lus10041639	15185355	15189194	RLK	30348	Lu5-15681773	5	15681773	8.71	5	Lus10024081	15725123	15728803	RLK	0.95
Lu2-4370145	2	4370145	0.94	Lus10020215	4421980	4423988	WRKY	51835	Lu13-2038032	13	2038032	0.59	13	Lus10026838	1981440	1985178	WRKY	0.92
Lu2-4370145	2	4370145	0.94	Lus10020188	4283474	4286653	TM-CC	83492	Lu13-2038032	13	2038032	0.59	13	Lus10026992	2109984	2112573	TM-CC	0.93
Lu2-4370145	2	4370145	0.94	Lus10020189	4289398	4291506	RLP	78639	Lu13-2038032	13	2038032	0.59	13	Lus10026993	2107200	2109308	RLP	0.94
Lu14-2160157	14	2160157	0.9	Lus10025544	2230403	2232708	RLK	70246	Lu14-2160157	14	2160157	0.9	14	Lus10025545	2235555	2236556	RLK	0.5
Lu14-2160157	14	2160157	0.9	Lus10025545	2235555	2236556	RLK	75398	Lu14-2160157	14	2160157	0.9	14	Lus10025544	2230403	2232708	RLK	0.51
Lu2-805034	2	805034	0.86	Lus10019248	722575	726044	RLK	78990	Lu13-5667491	13	5667491	2.29	13	Lus10011576	5672600	5675656	RLK	0.93
Lu10-16094406	10	16094406	0.84	Lus10022900	16154230	16157202	CNL	59824	Lu5-1333779	5	1333779	3.63	5	Lus10029705	1289543	1290535	CNL	0.64
Lu13-2803036	13	2803036	0.81	Lus10001034	2873870	2876374	RLP	70834	Lu13-2803036	13	2803036	0.81	13	Lus10001035	2877002	2882692	RLP	0.79
Lu13-2803036	13	2803036	0.81	Lus10001035	2877002	2882692	RLP	73966	Lu13-2803036	13	2803036	0.81	13	Lus10001034	2873870	2876374	RLP	0.79
Lu7-4389073	7	4389073	0.77	Lus10040196	4376947	4380527	TM-CC	8546	Lu9-5067368	9	5067368	3.2	9	Lus10028292	5039187	5042259	TM-CC	0.9
Lu7-4389073	7	4389073	0.77	Lus10040186	4443831	4446900	RLK	54758	Lu9-5067368	9	5067368	3.2	9	Lus10004388	5131906	5138235	RLK	0.86
Lu7-4389073	7	4389073	0.77	Lus10040210	4309085	4309381	CNL	79692	Lu9-5067368	9	5067368	3.2	9	Lus10028279	4972365	4975644	CNL	0.85
Lu3-1743768	3	1743768	0.67	Lus10037297	1815017	1816267	RLK	71249	Lu2-4181088	2	4181088	8.17	2	Lus10020183	4257022	4259288	RLK	0.52
Lu3-1743768	3	1743768	0.67	Lus10037311	1738506	1742264	RLK	1504	Lu3-1743768	3	1743768	0.67	3	Lus10037310	1744034	1747357	RLK	0.58
Lu3-1743768	3	1743768	0.67	Lus10037310	1744034	1747357	RLK	266	Lu3-1743768	3	1743768	0.67	3	Lus10037311	1738506	1742264	RLK	0.58
Lu1-229016	1	229016	0.67	Lus10036136	241089	242719	RLK	12073	Lu12-1884050	12	1884050	3.32	12	Lus10023339	1833679	1837008	RLK	0.76
Lu11-18699856	11	18699856	0.65	Lus10031254	18796297	18797480	RLP	96441	Lu3-24926663	3	24926663	0.45	3	Lus10037705	24826326	24827432	RLP	0.61
Lu14-5476624	14	5476624	0.65	Lus10014150	5375403	5382647	RLK	93977	Lu3-25442243	3	25442243	0.27	3	Lus10037562	25427779	25435263	TM-CC	0.98
Lu11-18699856	11	18699856	0.65	Lus10031230	18696229	18699398	RLK	458	Lu11-18699856	11	18699856	0.65	11	Lus10031228	18693790	18694870	RLK	0.63
Lu11-18699856	11	18699856	0.65	Lus10031228	18693790	18694870	RLK	4986	Lu11-18699856	11	18699856	0.65	11	Lus10031230	18696229	18699398	RLK	0.63
Lu9-3389033	9	3389033	0.61	Lus10040500	3458671	3461533	RLK	69638	Lu7-2864158	7	2864158	2.41	7	Lus10011302	2838905	2841730	RLK	0.96
Lu9-3389033	9	3389033	0.61	Lus10007543	3295804	3298169	RLK	90864	Lu7-2731752	7	2731752	6.28	7	Lus10012193	2695771	2698659	RLK	0.97
Lu13-2038032	13	2038032	0.59	Lus10026992	2109984	2112573	TM-CC	71952	Lu2-4370145	2	4370145	0.94	2	Lus10020188	4283474	4286653	TM-CC	0.93
Lu13-2038032	13	2038032	0.59	Lus10026993	2107200	2109308	RLP	69168	Lu2-4370145	2	4370145	0.94	2	Lus10020189	4289398	4291506	RLP	0.94
Lu13-2038032	13	2038032	0.59	Lus10026838	1981440	1985178	WRKY	52854	Lu2-4370145	2	4370145	0.94	2	Lus10020215	4421980	4423988	WRKY	0.93
Lu13-2038032	13	2038032	0.59	Lus10026845	1944672	1945903	TNL	92129	Lu4-15107754	4	15107754	5.65	4	Lus10041606	15023270	15024256	TNL	0.76
Lu9-3234392	9	3234392	0.59	Lus10007543	3295804	3298169	RLK	61412	Lu7-2731752	7	2731752	6.28	7	Lus10012193	2695771	2698659	RLK	0.97
Lu1-28738634	1	28738634	0.55	Lus10006057	28686182	28689003	RLK	49631	Lu1-28738634	1	28738634	0.55	1	Lus10006056	28681727	28684082	RLK	0.71
Lu1-28738634	1	28738634	0.55	Lus10006056	28681727	28684082	RLK	54552	Lu1-28738634	1	28738634	0.55	1	Lus10006057	28686182	28689003	RLK	0.71
Lu1-28738634	1	28738634	0.55	Lus10006067	28745009	28748864	RLK	6375	Lu14-415594	14	415594	4.72	14	Lus10009429	457234	460472	RLK	0.75
Lu13-3599975	13	3599975	0.54	Lus10026082	3605340	3606813	WRKY	5365	Lu5-15681773	5	15681773	8.71	5	Lus10024074	15698530	15699898	WRKY	0.6
Lu11-262510	11	262510	0.5	Lus10027354	169159	172623	TM-CC	89887	Lu11-262510	11	262510	0.5	11	Lus10027353	174231	177125	TM-CC	0.7
Lu11-262510	11	262510	0.5	Lus10027353	174231	177125	TM-CC	85385	Lu11-262510	11	262510	0.5	11	Lus10027354	169159	172623	TM-CC	0.7
Lu14-4976146	14	4976146	0.47	Lus10014236	4954671	4957103	RLK	19043	Lu14-4976146	14	4976146	0.47	14	Lus10014235	4957874	4960241	RLK	0.68
Lu14-4976146	14	4976146	0.47	Lus10014235	4957874	4960241	RLK	15905	Lu14-4976146	14	4976146	0.47	14	Lus10014236	4954671	4957103	RLK	0.68
Lu9-6273089	9	6273089	0.46	Lus10031043	6265980	6269593	RLK	3496	Lu12-18665793	12	18665793	3.83	12	Lus10003072	18723654	18726224	RLK	0.64
Lu3-24926663	3	24926663	0.45	Lus10037705	24826326	24827432	RLP	99231	Lu11-18699856	11	18699856	0.65	11	Lus10031254	18796297	18797480	RLP	0.61
Lu15-7064467	15	7064467	0.44	Lus10001489	6987299	6990719	RLK	73748	Lu5-1763832	5	1763832	16.34	5	Lus10008486	1714708	1718110	RLK	0.96
Lu1-6638662	1	6638662	0.41	Lus10034242	6599897	6600799	RLK	37863	Lu1-6638662	1	6638662	0.41	1	Lus10034246	6586729	6587413	RLK	0.9
Lu1-6638662	1	6638662	0.41	Lus10034246	6586729	6587413	RLK	51249	Lu1-6638662	1	6638662	0.41	1	Lus10034242	6599897	6600799	RLK	0.9
Lu3-6007426	3	6007426	0.34	Lus10040620	5998536	6001221	TM-CC	6205	Lu12-5085475	12	5085475	2	12	Lus10018289	5110353	5112941	TM-CC	0.94
Lu11-603845	11	603845	0.32	Lus10027239	634273	635683	RLP	30428	Lu4-13869828	4	13869828	2.85	4	Lus10034384	13844908	13846808	RLP	0.54
Lu11-18955548	11	18955548	0.32	Lus10031290	19014401	19016992	RLK	58853	Lu10-723479	10	723479	4.52	10	Lus10031860	777431	781117	RLK	0.81
Lu1-16481152	1	16481152	0.32	Lus10027040	16459072	16459731	RLP	21421	Lu13-17247218	13	17247218	2.32	13	Lus10025578	17222805	17224022	RLP	0.93
Lu3-25442243	3	25442243	0.27	Lus10037562	25427779	25435263	TM-CC	6980	Lu14-5476624	14	5476624	0.65	14	Lus10014150	5375403	5382647	RLK	0.98
Lu8-19197787	8	19197787	0.22	Lus10006317	19172422	19173282	DIR	24505	Lu5-1863116	5	1863116	7.25	5	Lus10029585	1900103	1900468	DIR	0.98
Lu11-5325415	11	5325415	0.21	Lus10038227	5399813	5400616	RLK	74398	Lu1-1888391	1	1888391	2.07	1	Lus10025875	1966159	1966953	RLK	0.91
Lu1-27439547	1	27439547	0.14	Lus10010085	27513205	27516324	TM-CC	73658	Lu15-13552352	15	13552352	2.29	15	Lus10038017	13607216	13610043	TM-CC	0.78
Lu1-302574	1	302574	0.11	Lus10036136	241089	242719	RLK	59855	Lu12-1884050	12	1884050	3.32	12	Lus10023339	1833679	1837008	RLK	0.76
Lu3-14062648	3	14062648	0.07	Lus10005839	14027882	14033536	TM-CC	29112	Lu3-14062648	3	14062648	0.07	3	Lus10039458	13970596	13976209	TM-CC	0.97
Lu3-14062648	3	14062648	0.07	Lus10039458	13970596	13976209	TM-CC	86439	Lu3-14062648	3	14062648	0.07	3	Lus10005839	14027882	14033536	TM-CC	0.95
Lu8-18946459	8	18946459	0.05	Lus10002247	19020694	19023979	TNL	74235	Lu8-18946459	8	18946459	0.05	8	Lus10002249	19037487	19042009	TNL	0.8
Lu8-18946459	8	18946459	0.05	Lus10002249	19037487	19042009	TNL	91028	Lu8-18946459	8	18946459	0.05	8	Lus10002247	19020694	19023979	TNL	0.8
Lu12-19651913	12	19651913	0.05	Lus10031603	19703176	19705988	RLK	51263	Lu12-19651913	12	19651913	0.05	12	Lus10031602	19706543	19707946	RLK	0.82
Lu12-19651913	12	19651913	0.05	Lus10031602	19706543	19707946	RLK	54630	Lu12-19651913	12	19651913	0.05	12	Lus10031603	19703176	19705988	RLK	0.82
Lu3-4288634	3	4288634	0.05	Lus10019114	4381523	4388318	RLK	92889	Lu14-15588631	14	15588631	1.93	14	Lus10003244	15659036	15664924	RLK	0.58
Lu1-20253410	1	20253410	0.04	Lus10020936	20199563	20202012	RLK	51398	Lu1-20253410	1	20253410	0.04	1	Lus10020935	20188774	20191973	RLK	0.98
Lu1-20253410	1	20253410	0.04	Lus10020935	20188774	20191973	RLK	61437	Lu1-20253410	1	20253410	0.04	1	Lus10020936	20199563	20202012	RLK	0.98
Lu3-4335448	3	4335448	0.02	Lus10019114	4381523	4388318	RLK	46075	Lu14-15588631	14	15588631	1.93	14	Lus10003244	15659036	15664924	RLK	0.58
Lu14-16548135	14	16548135	0.01	Lus10018027	16539146	16544259	TM-CC	3876	Lu11-3025137	11	3025137	1.39	11	Lus10042023	3065596	3070805	TM-CC	0.94
