# Supplementary figures and images for: Insights into the Genetic Architecture and Genomic Prediction of Powdery Mildew Resistance in Flax (Linum usitatissimum L.)
Source: MDPI journal article supplement (doi:10.3390/ijms23094960), 2022-04-29

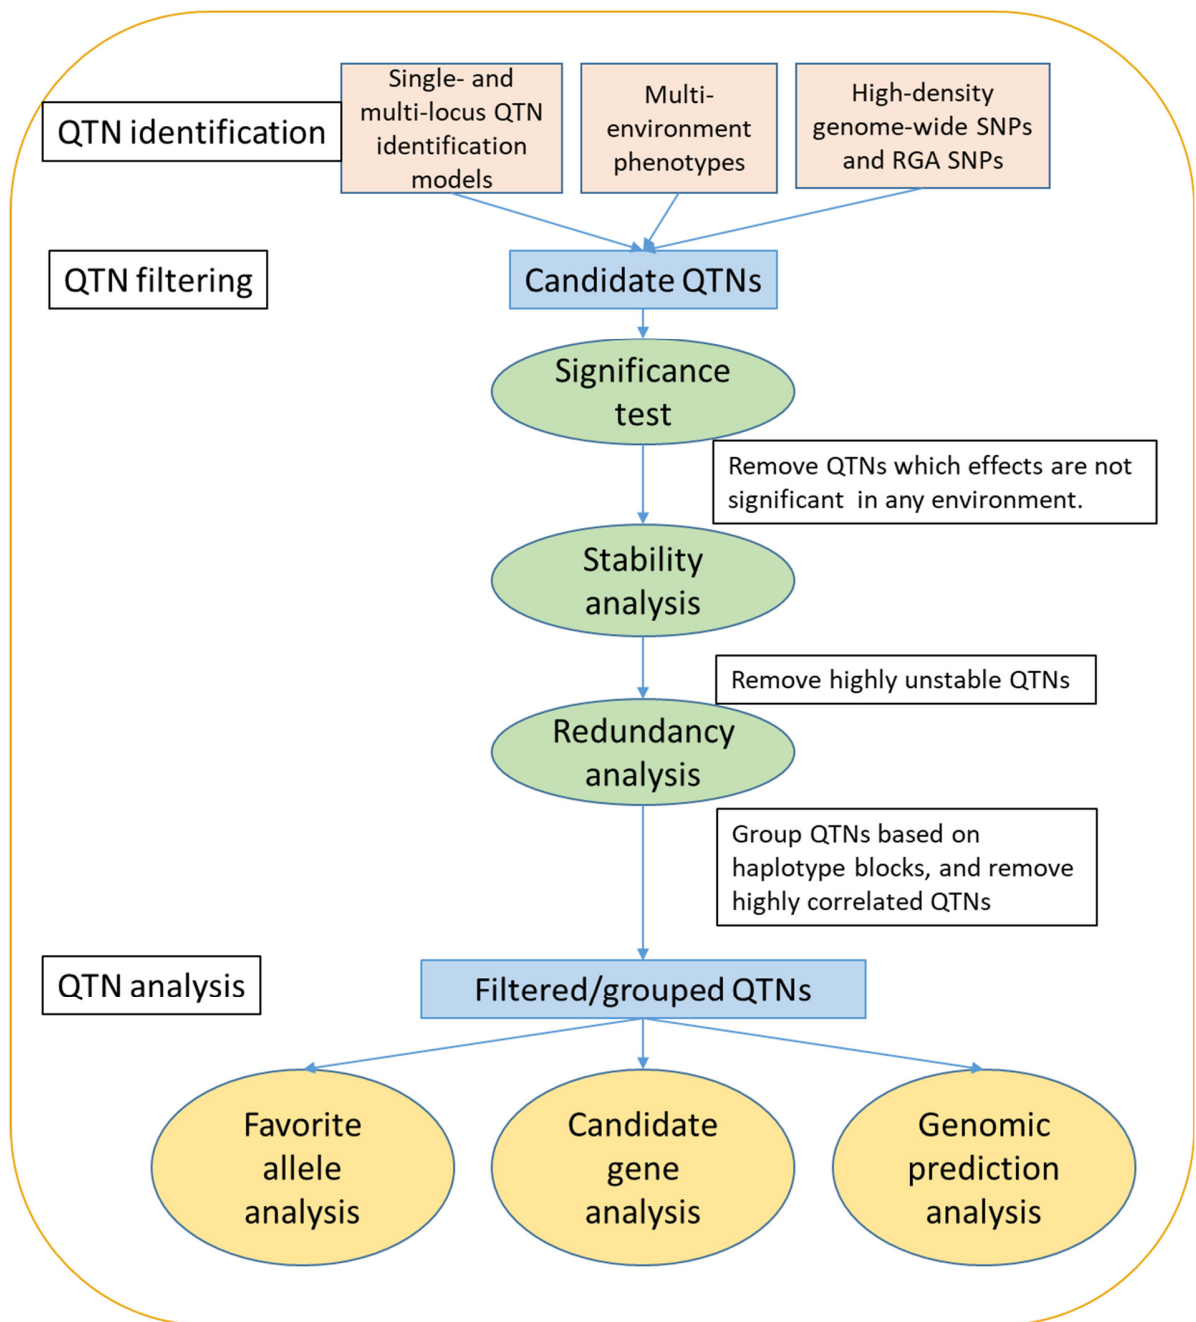

**Figure S6.** Pipeline for quantitative trait nucleotide (QTN) identification and analysis

Supplement: s1 [file s1]
